# Supplementary material
Source: PubMed Central journal article supplement (PMC3227866)
Supplement: NIHMS328033-supplement-01.pdf [file NIHMS328033-supplement-01.pdf]

**Saha et al. “Arginylation meets methylation: posttranslational modifications double up to regulate nuclear proteins and nuclear architecture in vivo”**

## **Dataset S2**

### Mass spectra of arginylated peptides with detailed description of b and y ions

The following dataset contains the mass spectra of identified arginylated peptides. Each spectrum is followed by a table containing the expected and identified ions for the spectrum. The identified ions are highlighted in bold font in the tables. In the mass spectra b and y ions are marked in red and blue respectively. The complete sequence of the modified peptide is represented on top of each spectrum.



|          |                 |    |   |    |                 |                |
|----------|-----------------|----|---|----|-----------------|----------------|
| 2329.176 | 1165.092        | 21 | N | 14 | <b>1457.688</b> | <b>729.347</b> |
| 2444.203 | <b>1222.605</b> | 22 | D | 13 | <b>1343.645</b> | <b>672.326</b> |
| 2541.255 | 1271.131        | 23 | P | 12 | <b>1228.618</b> | <b>614.812</b> |
| 2644.265 | 1322.636        | 24 | C | 11 | <b>1131.565</b> | 566.286        |
| 2715.302 | <b>1358.155</b> | 25 | A | 10 | <b>1028.556</b> | 514.782        |
| 2828.386 | <b>1414.697</b> | 26 | L | 9  | <b>957.519</b>  | 479.263        |
| 2931.395 | <b>1466.201</b> | 27 | C | 8  | 844.435         | 422.721        |
| 3018.427 | <b>1509.717</b> | 28 | S | 7  | <b>741.425</b>  | 371.216        |
| 3131.511 | <b>1566.259</b> | 29 | L | 6  | <b>654.393</b>  | 327.700        |
| 3268.570 | <b>1634.789</b> | 30 | H | 5  | <b>541.309</b>  | 271.158        |
| 3355.602 | <b>1678.305</b> | 31 | S | 4  | <b>404.250</b>  | 202.629        |
| 3468.686 | <b>1734.847</b> | 32 | I | 3  | 317.218         | 159.113        |
| 3525.708 | <b>1763.357</b> | 33 | G | 2  | 204.134         | 102.571        |
| 3653.803 | <b>1827.405</b> | 34 | K | 1  | 147.113         | 74.060         |

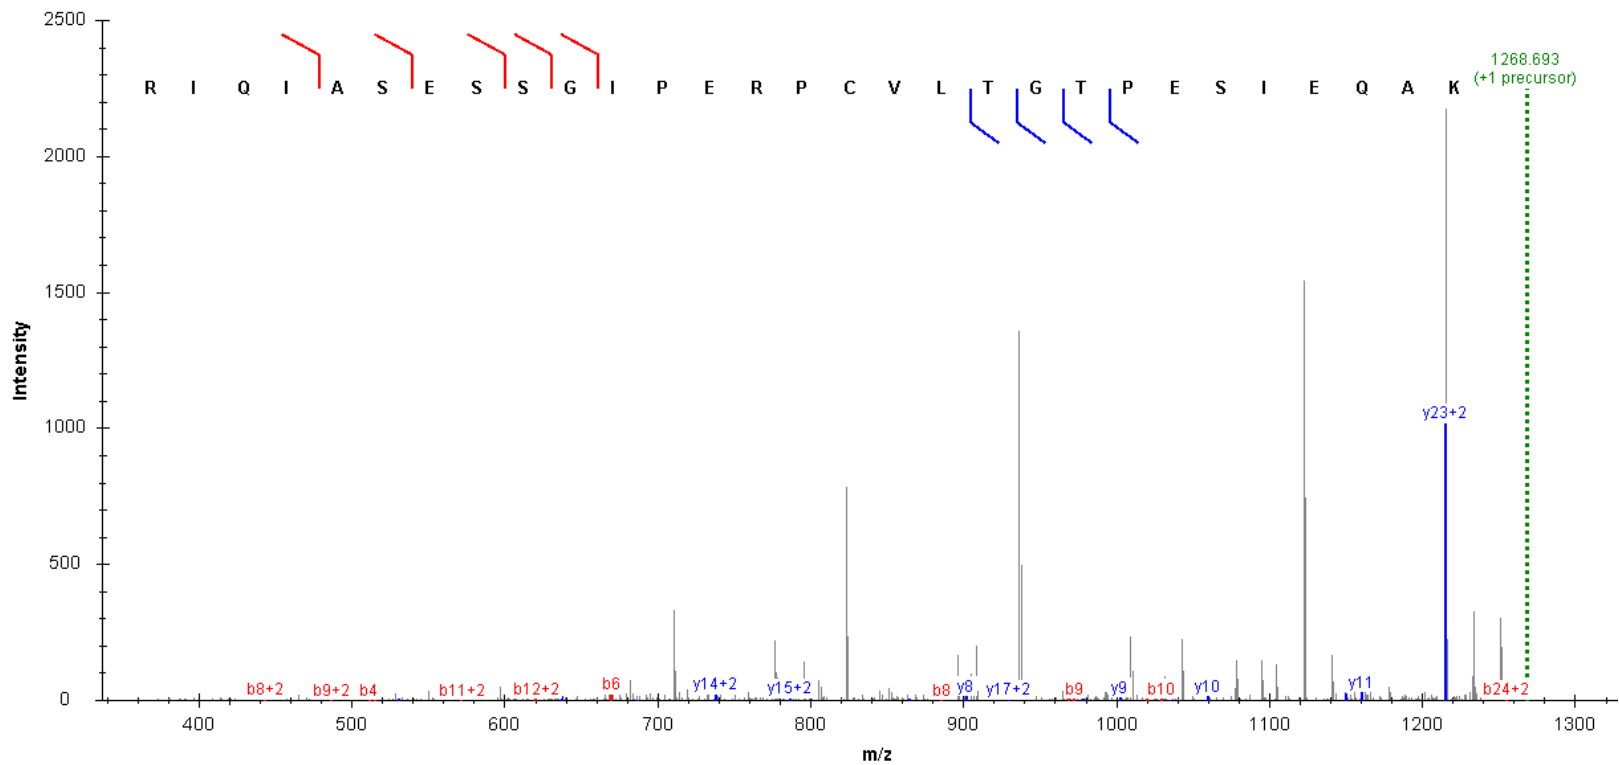

| b               | b(+2)           | #  | seq | #  | y               | y(+2)           |
|-----------------|-----------------|----|-----|----|-----------------|-----------------|
| 157.108         | 79.058          | 1  | R   | 29 | 3096.599        | 1548.803        |
| 270.192         | 135.600         | 2  | I   | 28 | 2940.498        | 1470.753        |
| 398.251         | 199.629         | 3  | Q   | 27 | 2827.414        | 1414.211        |
| <b>511.335</b>  | 256.171         | 4  | I   | 26 | 2699.356        | 1350.181        |
| 582.372         | 291.690         | 5  | A   | 25 | 2586.272        | 1293.639        |
| <b>669.404</b>  | 335.206         | 6  | S   | 24 | 2515.234        | 1258.121        |
| 798.447         | 399.727         | 7  | E   | 23 | 2428.202        | <b>1214.605</b> |
| <b>885.479</b>  | <b>443.243</b>  | 8  | S   | 22 | 2299.160        | <b>1150.084</b> |
| <b>972.511</b>  | <b>486.759</b>  | 9  | S   | 21 | 2212.128        | 1106.568        |
| <b>1029.532</b> | <b>515.270</b>  | 10 | G   | 20 | 2125.096        | 1063.052        |
| 1142.616        | <b>571.812</b>  | 11 | I   | 19 | 2068.074        | <b>1034.541</b> |
| 1239.669        | <b>620.338</b>  | 12 | P   | 18 | 1954.990        | <b>977.999</b>  |
| 1368.712        | 684.860         | 13 | E   | 17 | 1857.937        | <b>929.472</b>  |
| 1524.813        | 762.910         | 14 | R   | 16 | 1728.895        | <b>864.951</b>  |
| 1621.866        | 811.436         | 15 | P   | 15 | 1572.794        | <b>786.901</b>  |
| 1724.875        | 862.941         | 16 | C   | 14 | 1475.741        | <b>738.374</b>  |
| 1823.943        | 912.475         | 17 | V   | 13 | 1372.732        | <b>686.870</b>  |
| 1937.027        | <b>969.017</b>  | 18 | L   | 12 | 1273.663        | <b>637.335</b>  |
| 2038.075        | <b>1019.541</b> | 19 | T   | 11 | <b>1160.579</b> | 580.793         |
| 2095.096        | 1048.052        | 20 | G   | 10 | <b>1059.532</b> | <b>530.269</b>  |
| 2196.144        | 1098.576        | 21 | T   | 9  | <b>1002.510</b> | 501.759         |

|          |                 |    |   |   |                |         |
|----------|-----------------|----|---|---|----------------|---------|
| 2293.197 | 1147.102        | 22 | P | 8 | <b>901.463</b> | 451.235 |
| 2422.239 | 1211.623        | 23 | E | 7 | 804.410        | 402.709 |
| 2509.272 | <b>1255.139</b> | 24 | S | 6 | 675.367        | 338.187 |
| 2622.356 | 1311.681        | 25 | I | 5 | 588.335        | 294.671 |
| 2751.398 | 1376.203        | 26 | E | 4 | 475.251        | 238.129 |
| 2879.457 | 1440.232        | 27 | Q | 3 | 346.208        | 173.608 |
| 2950.494 | 1475.751        | 28 | A | 2 | 218.150        | 109.579 |
| 3078.589 | 1539.798        | 29 | K | 1 | 147.113        | 74.060  |

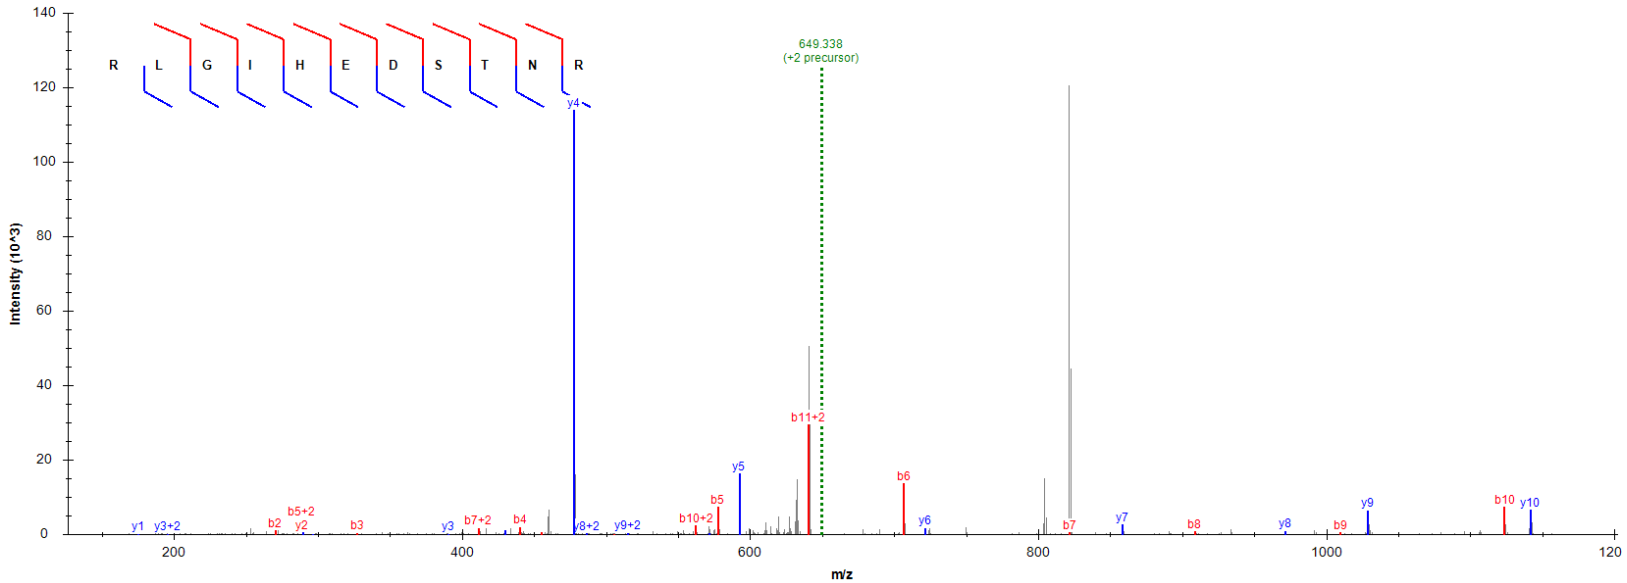

| <b>b</b>        | <b>b(+2)</b>   | <b>#</b> | <b>seq</b> | <b>#</b> | <b>y</b>        | <b>y(+2)</b>   |
|-----------------|----------------|----------|------------|----------|-----------------|----------------|
| 157.108         | 79.058         | 1        | R          | 11       | 1297.661        | 649.334        |
| <b>270.192</b>  | 135.600        | 2        | L          | 10       | <b>1141.560</b> | <b>571.283</b> |
| <b>327.214</b>  | 164.111        | 3        | G          | 9        | <b>1028.476</b> | <b>514.741</b> |
| <b>440.298</b>  | 220.653        | 4        | I          | 8        | <b>971.454</b>  | <b>486.231</b> |
| <b>577.357</b>  | <b>289.182</b> | 5        | H          | 7        | <b>858.370</b>  | <b>429.689</b> |
| <b>706.399</b>  | 353.703        | 6        | E          | 6        | <b>721.311</b>  | 361.159        |
| <b>821.426</b>  | <b>411.217</b> | 7        | D          | 5        | <b>592.269</b>  | <b>296.638</b> |
| <b>908.458</b>  | <b>454.733</b> | 8        | S          | 4        | <b>477.242</b>  | 239.124        |
| <b>1009.506</b> | <b>505.257</b> | 9        | T          | 3        | <b>390.210</b>  | <b>195.608</b> |
| <b>1123.549</b> | <b>562.278</b> | 10       | N          | 2        | <b>289.162</b>  | 145.085        |
| 1279.650        | <b>640.329</b> | 11       | R          | 1        | <b>175.119</b>  | 88.063         |

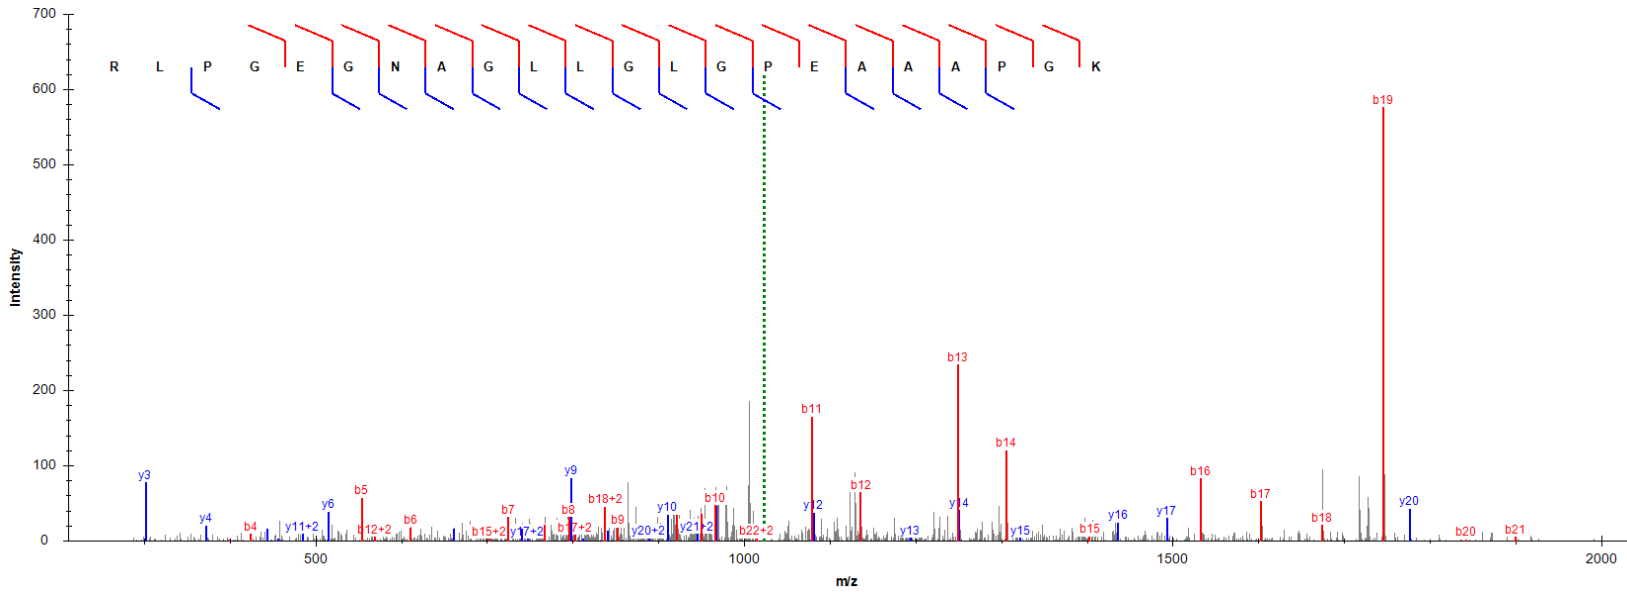

| b               | b(+2)           | #  | seq | #  | y               | y(+2)          |
|-----------------|-----------------|----|-----|----|-----------------|----------------|
| 157.108         | 79.058          | 1  | R   | 22 | 2045.114        | 1023.061       |
| 270.192         | 135.600         | 2  | L   | 21 | 1889.013        | <b>945.010</b> |
| 367.245         | 184.126         | 3  | P   | 20 | <b>1775.929</b> | <b>888.468</b> |
| <b>424.267</b>  | 212.637         | 4  | G   | 19 | 1678.876        | <b>839.942</b> |
| <b>553.309</b>  | 277.158         | 5  | E   | 18 | 1621.854        | <b>811.431</b> |
| <b>610.331</b>  | 305.669         | 6  | G   | 17 | <b>1492.812</b> | <b>746.910</b> |
| <b>724.374</b>  | 362.690         | 7  | N   | 16 | <b>1435.790</b> | 718.399        |
| <b>795.411</b>  | <b>398.209</b>  | 8  | A   | 15 | <b>1321.747</b> | <b>661.377</b> |
| <b>852.432</b>  | 426.720         | 9  | G   | 14 | <b>1250.710</b> | 625.859        |
| <b>965.516</b>  | 483.262         | 10 | L   | 13 | <b>1193.689</b> | 597.348        |
| <b>1078.600</b> | 539.804         | 11 | L   | 12 | <b>1080.605</b> | 540.806        |
| <b>1135.622</b> | <b>568.315</b>  | 12 | G   | 11 | <b>967.521</b>  | <b>484.264</b> |
| <b>1248.706</b> | 624.857         | 13 | L   | 10 | <b>910.499</b>  | <b>455.753</b> |
| <b>1305.727</b> | 653.367         | 14 | G   | 9  | <b>797.415</b>  | <b>399.211</b> |
| <b>1402.780</b> | <b>701.894</b>  | 15 | P   | 8  | <b>740.394</b>  | 370.701        |
| <b>1531.823</b> | <b>766.415</b>  | 16 | E   | 7  | 643.341         | 322.174        |
| <b>1602.860</b> | <b>801.934</b>  | 17 | A   | 6  | <b>514.298</b>  | 257.653        |
| <b>1673.897</b> | <b>837.452</b>  | 18 | A   | 5  | <b>443.261</b>  | 222.134        |
| <b>1744.934</b> | 872.971         | 19 | A   | 4  | <b>372.224</b>  | 186.616        |
| <b>1841.987</b> | <b>921.497</b>  | 20 | P   | 3  | <b>301.187</b>  | 151.097        |
| <b>1899.008</b> | <b>950.008</b>  | 21 | G   | 2  | 204.134         | 102.571        |
| 2027.103        | <b>1014.055</b> | 22 | K   | 1  | 147.113         | 74.060         |

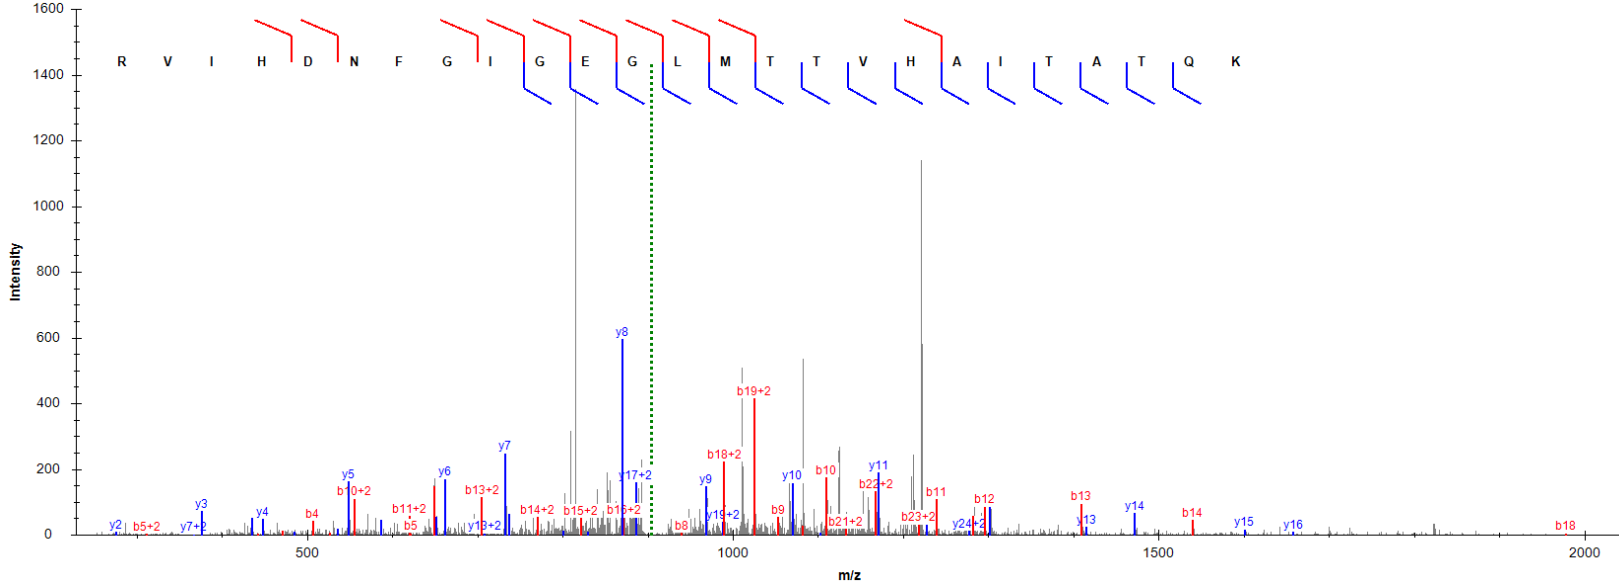

| b               | b(+2)           | #  | seq | #  | y               | y(+2)           |
|-----------------|-----------------|----|-----|----|-----------------|-----------------|
| 157.108         | 79.058          | 1  | R   | 25 | 2709.414        | 1355.211        |
| 256.177         | 128.592         | 2  | V   | 24 | 2553.313        | <b>1277.160</b> |
| 369.261         | 185.134         | 3  | I   | 23 | 2454.245        | <b>1227.626</b> |
| <b>506.320</b>  | 253.664         | 4  | H   | 22 | 2341.161        | 1171.084        |
| <b>621.347</b>  | <b>311.177</b>  | 5  | D   | 21 | 2204.102        | <b>1102.554</b> |
| 735.390         | 368.198         | 6  | N   | 20 | 2089.075        | 1045.041        |
| 882.458         | <b>441.733</b>  | 7  | F   | 19 | 1975.032        | <b>988.020</b>  |
| <b>939.480</b>  | <b>470.243</b>  | 8  | G   | 18 | 1827.963        | 914.485         |
| <b>1052.564</b> | <b>526.785</b>  | 9  | I   | 17 | 1770.942        | <b>885.975</b>  |
| <b>1109.585</b> | <b>555.296</b>  | 10 | G   | 16 | <b>1657.858</b> | <b>829.433</b>  |
| <b>1238.628</b> | <b>619.817</b>  | 11 | E   | 15 | <b>1600.836</b> | <b>800.922</b>  |
| <b>1295.649</b> | <b>648.328</b>  | 12 | G   | 14 | <b>1471.794</b> | <b>736.401</b>  |
| <b>1408.733</b> | <b>704.870</b>  | 13 | L   | 13 | <b>1414.772</b> | <b>707.890</b>  |
| <b>1539.774</b> | <b>770.390</b>  | 14 | M   | 12 | <b>1301.688</b> | <b>651.348</b>  |
| 1640.821        | <b>820.914</b>  | 15 | T   | 11 | <b>1170.648</b> | <b>585.827</b>  |
| 1741.869        | <b>871.438</b>  | 16 | T   | 10 | <b>1069.600</b> | <b>535.304</b>  |
| 1840.937        | 920.972         | 17 | V   | 9  | <b>968.552</b>  | <b>484.780</b>  |
| <b>1977.996</b> | <b>989.502</b>  | 18 | H   | 8  | <b>869.484</b>  | <b>435.246</b>  |
| 2049.033        | <b>1025.020</b> | 19 | A   | 7  | <b>732.425</b>  | <b>366.716</b>  |
| 2162.118        | <b>1081.562</b> | 20 | I   | 6  | <b>661.388</b>  | 331.198         |
| 2263.165        | <b>1132.086</b> | 21 | T   | 5  | <b>548.304</b>  | <b>274.656</b>  |
| 2334.202        | <b>1167.605</b> | 22 | A   | 4  | <b>447.256</b>  | 224.132         |
| 2435.250        | <b>1218.129</b> | 23 | T   | 3  | <b>376.219</b>  | 188.613         |
| 2563.309        | <b>1282.158</b> | 24 | Q   | 2  | <b>275.171</b>  | 138.089         |
| 2691.404        | 1346.205        | 25 | K   | 1  | 147.113         | 74.060          |



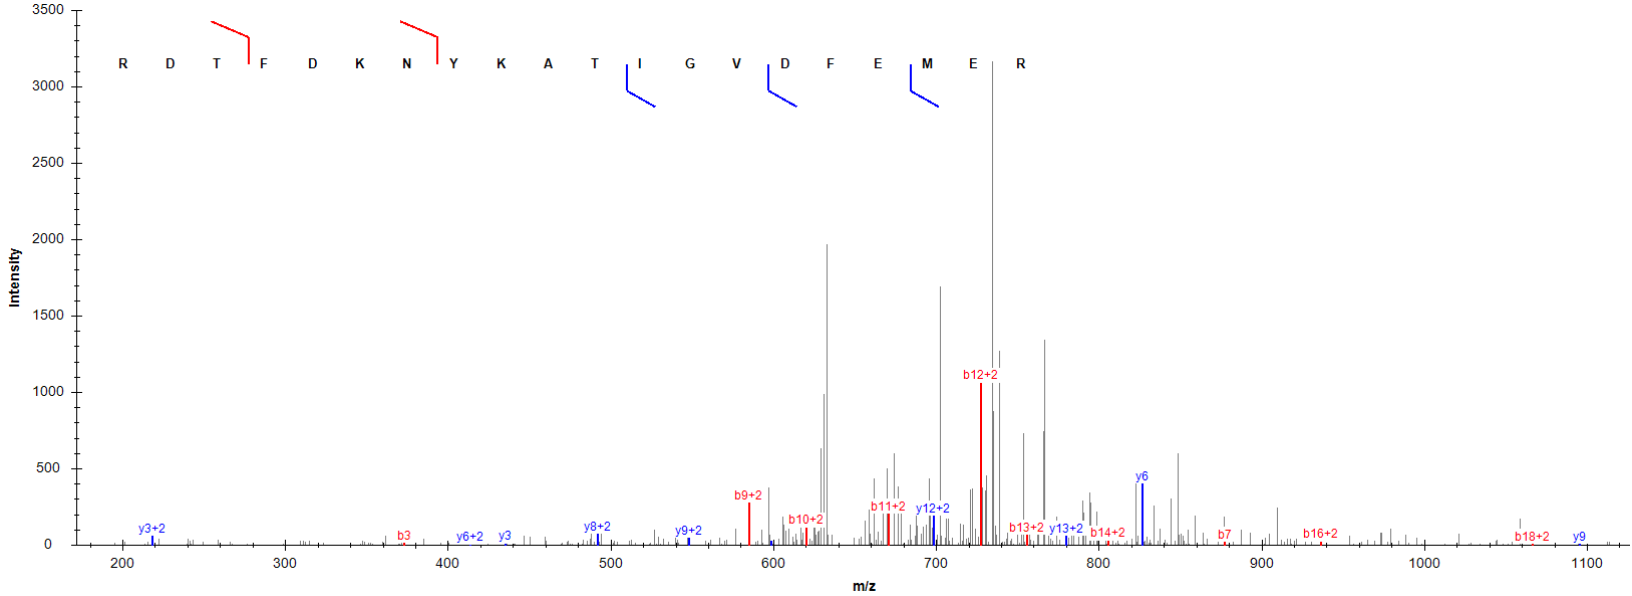

| b              | b(+2)           | #  | seq | #  | y               | y(+2)          |
|----------------|-----------------|----|-----|----|-----------------|----------------|
| 157.108        | 79.058          | 1  | R   | 20 | 2435.166        | 1218.087       |
| 272.135        | 136.571         | 2  | D   | 19 | 2279.065        | 1140.036       |
| <b>373.183</b> | 187.095         | 3  | T   | 18 | 2164.038        | 1082.523       |
| 520.251        | 260.629         | 4  | F   | 17 | 2062.990        | 1031.999       |
| 635.278        | 318.143         | 5  | D   | 16 | 1915.922        | 958.465        |
| 763.373        | 382.190         | 6  | K   | 15 | 1800.895        | 900.951        |
| <b>877.416</b> | 439.212         | 7  | N   | 14 | 1672.800        | 836.904        |
| 1040.480       | 520.743         | 8  | Y   | 13 | 1558.757        | <b>779.882</b> |
| 1168.575       | <b>584.791</b>  | 9  | K   | 12 | 1395.694        | <b>698.350</b> |
| 1239.612       | <b>620.309</b>  | 10 | A   | 11 | 1267.599        | 634.303        |
| 1340.659       | <b>670.833</b>  | 11 | T   | 10 | 1196.562        | <b>598.784</b> |
| 1453.743       | <b>727.375</b>  | 12 | I   | 9  | <b>1095.514</b> | <b>548.261</b> |
| 1510.765       | <b>755.886</b>  | 13 | G   | 8  | 982.430         | <b>491.719</b> |
| 1609.833       | <b>805.420</b>  | 14 | V   | 7  | 925.408         | 463.208        |
| 1724.860       | 862.934         | 15 | D   | 6  | <b>826.340</b>  | <b>413.674</b> |
| 1871.929       | <b>936.468</b>  | 16 | F   | 5  | 711.313         | 356.160        |
| 2000.971       | 1000.989        | 17 | E   | 4  | 564.245         | 282.626        |
| 2132.012       | <b>1066.509</b> | 18 | M   | 3  | <b>435.202</b>  | <b>218.105</b> |
| 2261.054       | 1131.031        | 19 | E   | 2  | 304.162         | 152.584        |
| 2417.155       | 1209.081        | 20 | R   | 1  | 175.119         | 88.063         |

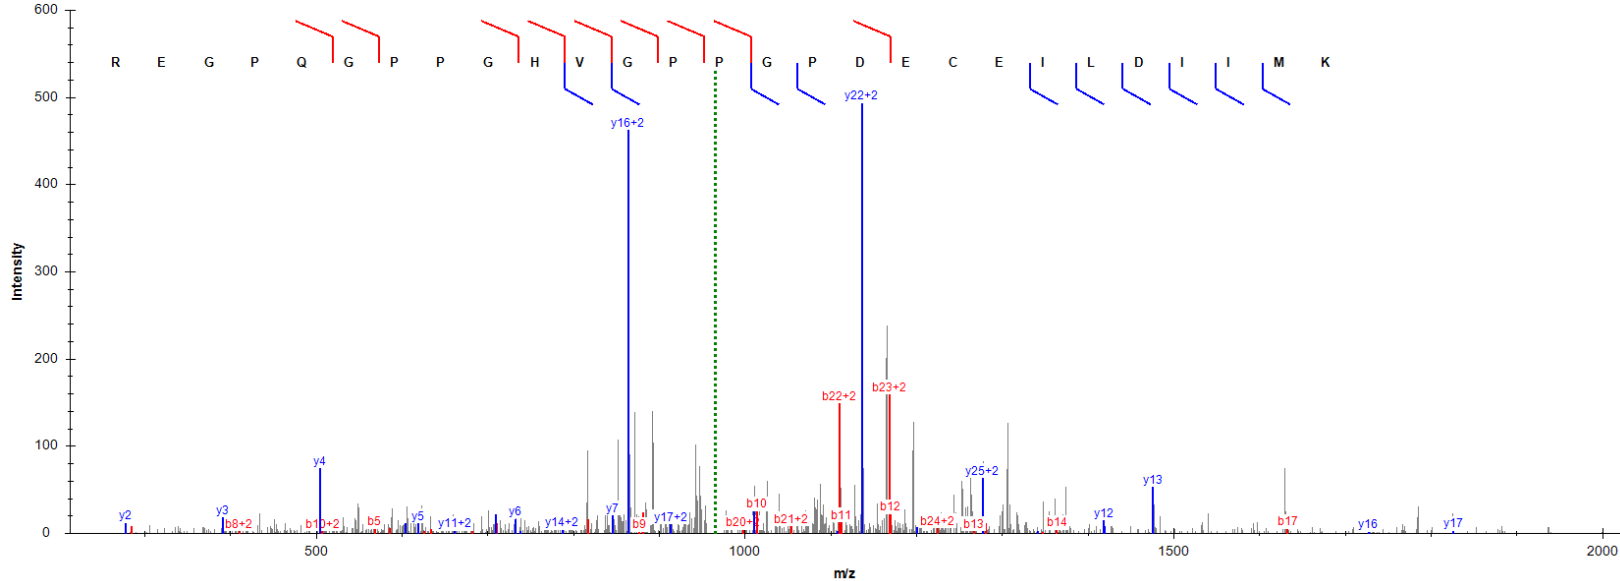

| b               | b(+2)           | #  | seq | #  | y               | y(+2)           |
|-----------------|-----------------|----|-----|----|-----------------|-----------------|
| 157.108         | 79.058          | 1  | R   | 27 | 2838.391        | <b>1419.699</b> |
| 286.151         | 143.579         | 2  | E   | 26 | 2682.290        | <b>1341.649</b> |
| 343.172         | 172.090         | 3  | G   | 25 | 2553.248        | <b>1277.127</b> |
| 440.225         | 220.616         | 4  | P   | 24 | 2496.226        | 1248.617        |
| <b>568.284</b>  | <b>284.646</b>  | 5  | Q   | 23 | 2399.173        | <b>1200.090</b> |
| <b>625.305</b>  | 313.156         | 6  | G   | 22 | 2271.115        | <b>1136.061</b> |
| 722.358         | 361.683         | 7  | P   | 21 | 2214.093        | <b>1107.550</b> |
| 819.411         | <b>410.209</b>  | 8  | P   | 20 | 2117.041        | 1059.024        |
| <b>876.432</b>  | 438.720         | 9  | G   | 19 | 2019.988        | <b>1010.498</b> |
| <b>1013.491</b> | <b>507.249</b>  | 10 | H   | 18 | 1962.966        | 981.987         |
| <b>1112.560</b> | 556.783         | 11 | V   | 17 | <b>1825.907</b> | <b>913.457</b>  |
| <b>1169.581</b> | <b>585.294</b>  | 12 | G   | 16 | <b>1726.839</b> | <b>863.923</b>  |
| <b>1266.634</b> | <b>633.821</b>  | 13 | P   | 15 | 1669.818        | 835.412         |
| <b>1363.687</b> | <b>682.347</b>  | 14 | P   | 14 | 1572.765        | <b>786.886</b>  |
| 1420.708        | <b>710.858</b>  | 15 | G   | 13 | <b>1475.712</b> | <b>738.360</b>  |
| 1517.761        | 759.384         | 16 | P   | 12 | <b>1418.691</b> | <b>709.849</b>  |
| <b>1632.788</b> | <b>816.898</b>  | 17 | D   | 11 | 1321.638        | <b>661.323</b>  |
| 1761.830        | <b>881.419</b>  | 18 | E   | 10 | 1206.611        | <b>603.809</b>  |
| 1864.840        | 932.923         | 19 | C   | 9  | 1077.568        | 539.288         |
| 1993.882        | <b>997.445</b>  | 20 | E   | 8  | 974.559         | 487.783         |
| 2106.966        | <b>1053.987</b> | 21 | I   | 7  | <b>845.516</b>  | 423.262         |
| 2220.050        | <b>1110.529</b> | 22 | L   | 6  | <b>732.432</b>  | 366.720         |
| 2335.077        | <b>1168.042</b> | 23 | D   | 5  | <b>619.348</b>  | 310.178         |
| 2448.161        | <b>1224.584</b> | 24 | I   | 4  | <b>504.321</b>  | 252.664         |
| 2561.245        | <b>1281.126</b> | 25 | I   | 3  | <b>391.237</b>  | 196.122         |

|          |                 |    |   |   |                |         |
|----------|-----------------|----|---|---|----------------|---------|
| 2692.286 | <b>1346.647</b> | 26 | M | 2 | <b>278.153</b> | 139.580 |
| 2820.381 | 1410.694        | 27 | K | 1 | 147.113        | 74.060  |

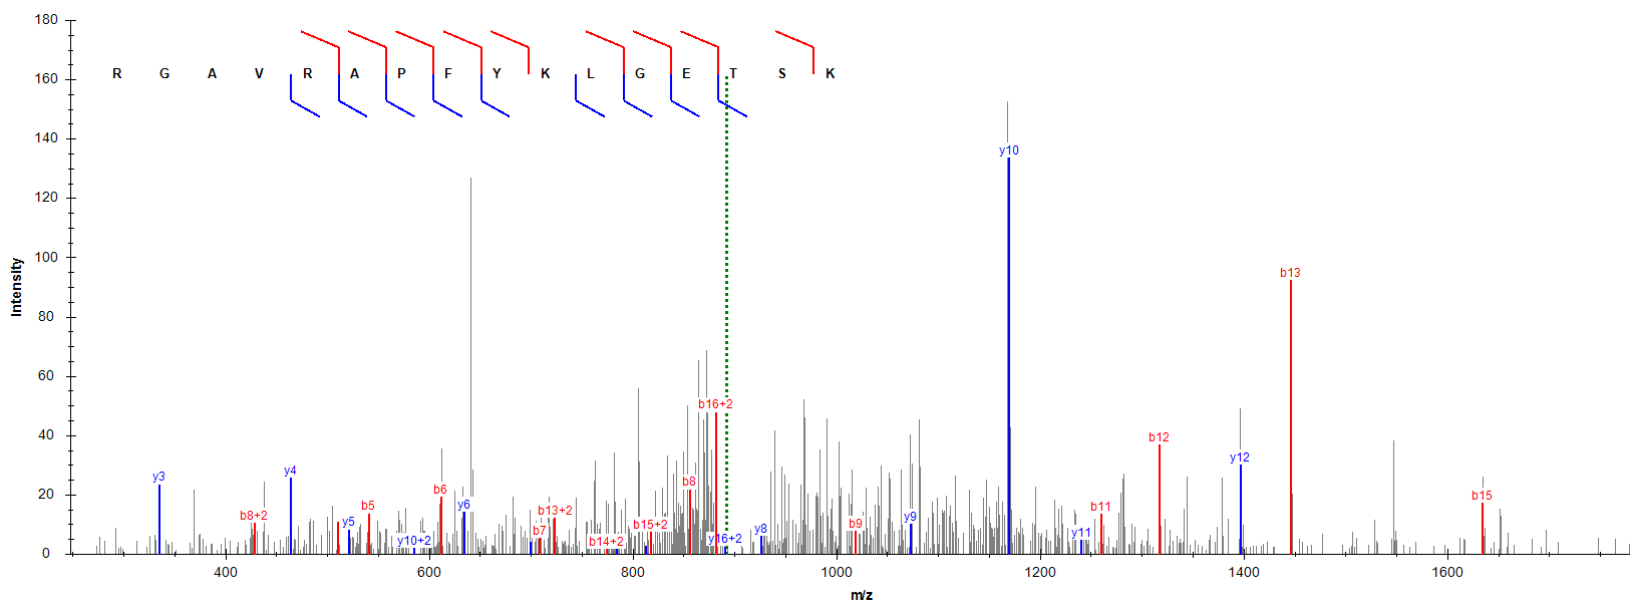

| <b>b</b>        | <b>b(+2)</b>   | <b>#</b> | <b>seq #</b> | <b>y</b> | <b>y(+2)</b>                   |
|-----------------|----------------|----------|--------------|----------|--------------------------------|
| 157.108         | 79.058         | 1        | R            | 16       | 1779.986 <b>890.497</b>        |
| 214.130         | 107.569        | 2        | G            | 15       | 1623.885 <b>812.446</b>        |
| 285.167         | 143.087        | 3        | A            | 14       | 1566.864 <b>783.936</b>        |
| 384.235         | 192.621        | 4        | V            | 13       | 1495.827 748.417               |
| <b>540.336</b>  | 270.672        | 5        | R            | 12       | <b>1396.758</b> <b>698.883</b> |
| <b>611.374</b>  | 306.190        | 6        | A            | 11       | <b>1240.657</b> 620.832        |
| <b>708.426</b>  | 354.717        | 7        | P            | 10       | <b>1169.620</b> <b>585.314</b> |
| <b>855.495</b>  | <b>428.251</b> | 8        | F            | 9        | <b>1072.567</b> 536.787        |
| <b>1018.558</b> | <b>509.783</b> | 9        | Y            | 8        | <b>925.499</b> 463.253         |
| 1146.653        | 573.830        | 10       | K            | 7        | 762.436 381.721                |
| <b>1259.737</b> | 630.372        | 11       | L            | 6        | <b>634.341</b> 317.674         |
| <b>1316.759</b> | 658.883        | 12       | G            | 5        | <b>521.257</b> 261.132         |
| <b>1445.801</b> | <b>723.404</b> | 13       | E            | 4        | <b>464.235</b> 232.621         |
| 1546.849        | <b>773.928</b> | 14       | T            | 3        | <b>335.193</b> 168.100         |
| <b>1633.881</b> | <b>817.444</b> | 15       | S            | 2        | 234.145 117.576                |
| 1761.976        | <b>881.492</b> | 16       | K            | 1        | 147.113 74.060                 |

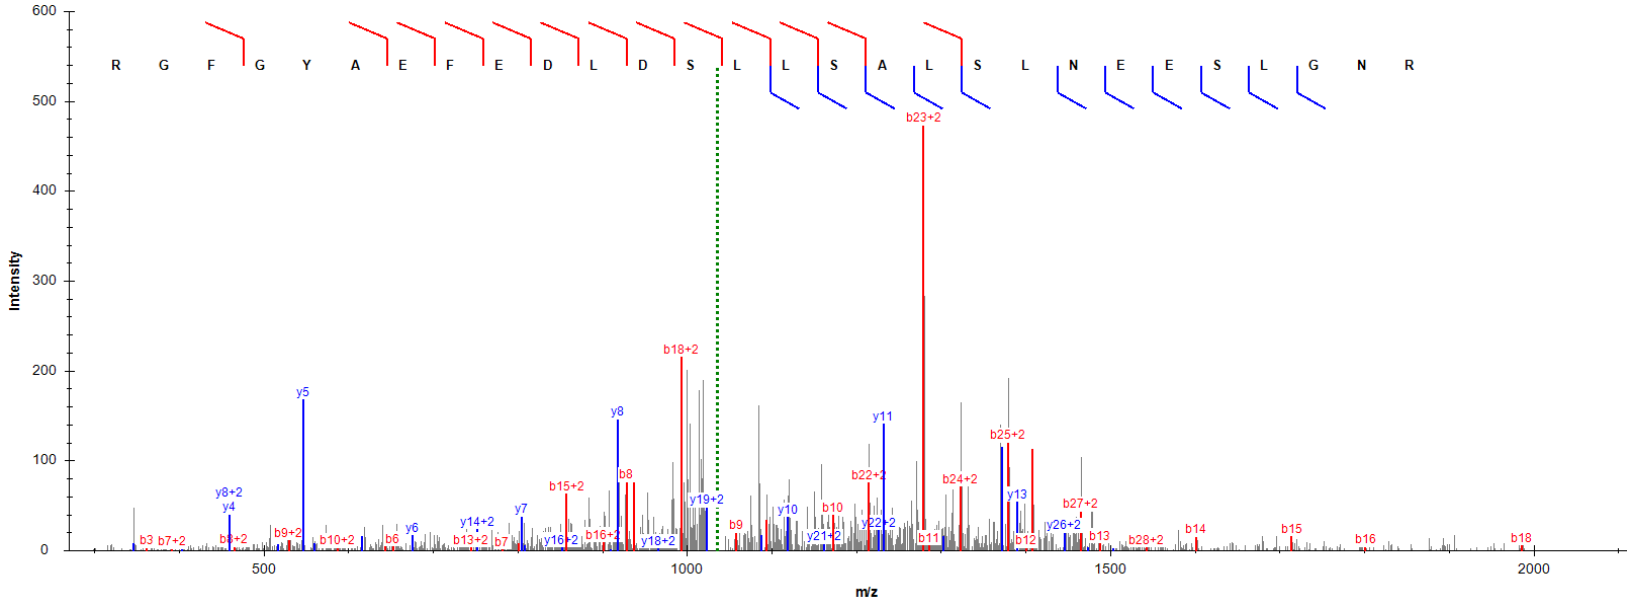

| b               | b(+2)           | #  | seq | #  | y               | y(+2)           |
|-----------------|-----------------|----|-----|----|-----------------|-----------------|
| 157.108         | 79.058          | 1  | R   | 28 | 3102.501        | 1551.754        |
| 214.130         | 107.569         | 2  | G   | 27 | 2946.400        | <b>1473.704</b> |
| <b>361.198</b>  | 181.103         | 3  | F   | 26 | 2889.379        | <b>1445.193</b> |
| 418.220         | 209.614         | 4  | G   | 25 | 2742.310        | <b>1371.659</b> |
| 581.283         | 291.145         | 5  | Y   | 24 | 2685.289        | 1343.148        |
| <b>652.320</b>  | 326.664         | 6  | A   | 23 | 2522.226        | 1261.616        |
| <b>781.363</b>  | <b>391.185</b>  | 7  | E   | 22 | 2451.189        | <b>1226.098</b> |
| <b>928.431</b>  | <b>464.719</b>  | 8  | F   | 21 | 2322.146        | <b>1161.577</b> |
| <b>1057.474</b> | <b>529.241</b>  | 9  | E   | 20 | 2175.078        | <b>1088.042</b> |
| <b>1172.501</b> | <b>586.754</b>  | 10 | D   | 19 | 2046.035        | <b>1023.521</b> |
| <b>1285.585</b> | <b>643.296</b>  | 11 | L   | 18 | 1931.008        | <b>966.008</b>  |
| <b>1400.612</b> | 700.809         | 12 | D   | 17 | 1817.924        | <b>909.466</b>  |
| <b>1487.644</b> | <b>744.326</b>  | 13 | S   | 16 | 1702.897        | <b>851.952</b>  |
| <b>1600.728</b> | <b>800.868</b>  | 14 | L   | 15 | 1615.865        | <b>808.436</b>  |
| <b>1713.812</b> | <b>857.410</b>  | 15 | L   | 14 | <b>1502.781</b> | <b>751.894</b>  |
| <b>1800.844</b> | <b>900.926</b>  | 16 | S   | 13 | <b>1389.697</b> | 695.352         |
| 1871.881        | <b>936.444</b>  | 17 | A   | 12 | <b>1302.665</b> | 651.836         |
| <b>1984.965</b> | <b>992.986</b>  | 18 | L   | 11 | <b>1231.628</b> | <b>616.317</b>  |
| 2071.997        | 1036.502        | 19 | S   | 10 | <b>1118.544</b> | <b>559.775</b>  |
| 2185.081        | <b>1093.044</b> | 20 | L   | 9  | 1031.512        | <b>516.259</b>  |
| 2299.124        | 1150.066        | 21 | N   | 8  | <b>918.428</b>  | <b>459.717</b>  |
| 2428.167        | <b>1214.587</b> | 22 | E   | 7  | <b>804.385</b>  | <b>402.696</b>  |
| 2557.209        | <b>1279.108</b> | 23 | E   | 6  | <b>675.342</b>  | 338.175         |
| 2644.241        | <b>1322.624</b> | 24 | S   | 5  | <b>546.299</b>  | 273.653         |
| 2757.325        | <b>1379.166</b> | 25 | L   | 4  | <b>459.267</b>  | 230.137         |

|          |                 |    |   |   |                |         |
|----------|-----------------|----|---|---|----------------|---------|
| 2814.347 | <b>1407.677</b> | 26 | G | 3 | <b>346.183</b> | 173.595 |
| 2928.390 | <b>1464.699</b> | 27 | N | 2 | 289.162        | 145.085 |
| 3084.491 | <b>1542.749</b> | 28 | R | 1 | 175.119        | 88.063  |

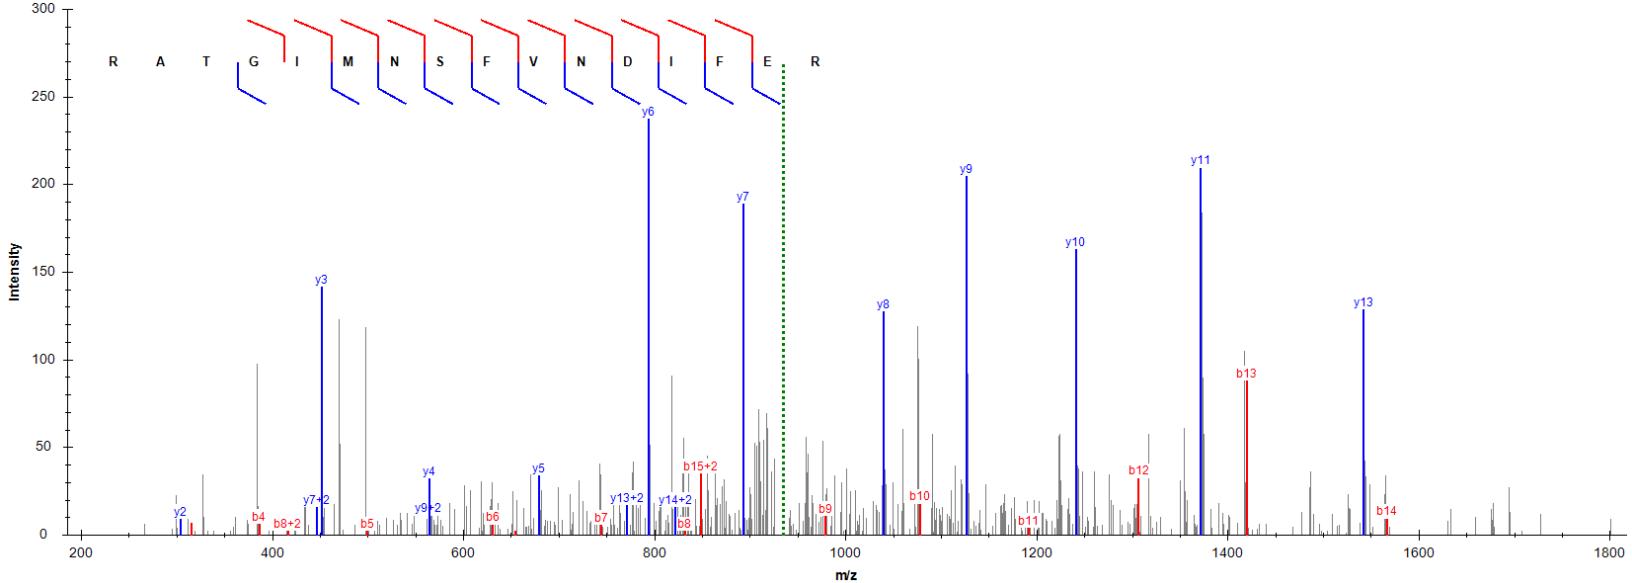

| b               | b(+2)          | #  | seq | #  | y               | y(+2)          |
|-----------------|----------------|----|-----|----|-----------------|----------------|
| 157.108         | 79.058         | 1  | R   | 16 | 1869.928        | 935.467        |
| 228.146         | 114.576        | 2  | A   | 15 | 1713.826        | 857.417        |
| 329.193         | 165.100        | 3  | T   | 14 | 1642.789        | <b>821.898</b> |
| <b>386.215</b>  | 193.611        | 4  | G   | 13 | <b>1541.742</b> | <b>771.374</b> |
| <b>499.299</b>  | 250.153        | 5  | I   | 12 | 1484.720        | 742.864        |
| <b>630.339</b>  | <b>315.673</b> | 6  | M   | 11 | <b>1371.636</b> | 686.322        |
| <b>744.382</b>  | 372.695        | 7  | N   | 10 | <b>1240.596</b> | 620.801        |
| <b>831.414</b>  | <b>416.211</b> | 8  | S   | 9  | <b>1126.553</b> | <b>563.780</b> |
| <b>978.483</b>  | 489.745        | 9  | F   | 8  | <b>1039.521</b> | 520.264        |
| <b>1077.551</b> | 539.279        | 10 | V   | 7  | <b>892.452</b>  | <b>446.730</b> |
| <b>1191.594</b> | 596.301        | 11 | N   | 6  | <b>793.384</b>  | 397.196        |
| <b>1306.621</b> | <b>653.814</b> | 12 | D   | 5  | <b>679.341</b>  | 340.174        |
| <b>1419.705</b> | 710.356        | 13 | I   | 4  | <b>564.314</b>  | 282.661        |
| <b>1566.773</b> | 783.890        | 14 | F   | 3  | <b>451.230</b>  | 226.119        |
| 1695.816        | <b>848.412</b> | 15 | E   | 2  | <b>304.162</b>  | 152.584        |
| 1851.917        | 926.462        | 16 | R   | 1  | 175.119         | 88.063         |

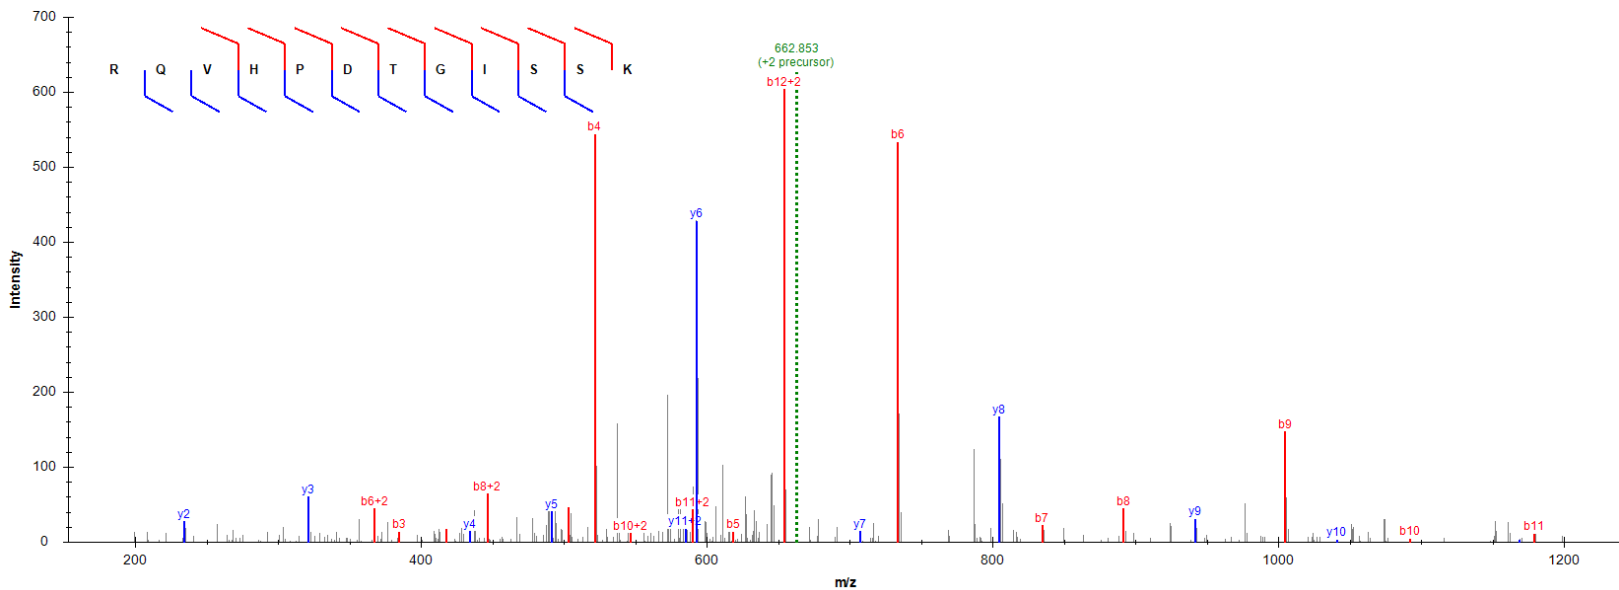

| b               | b(+2)          | #  | seq | #  | y               | y(+2)          |
|-----------------|----------------|----|-----|----|-----------------|----------------|
| 157.108         | 79.058         | 1  | R   | 12 | 1324.697        | 662.852        |
| 285.167         | 143.087        | 2  | Q   | 11 | <b>1168.596</b> | <b>584.801</b> |
| <b>384.235</b>  | 192.621        | 3  | V   | 10 | <b>1040.537</b> | 520.772        |
| <b>521.294</b>  | 261.151        | 4  | H   | 9  | <b>941.469</b>  | 471.238        |
| <b>618.347</b>  | 309.677        | 5  | P   | 8  | <b>804.410</b>  | 402.709        |
| <b>733.374</b>  | <b>367.191</b> | 6  | D   | 7  | <b>707.357</b>  | 354.182        |
| <b>834.422</b>  | <b>417.714</b> | 7  | T   | 6  | <b>592.330</b>  | 296.669        |
| <b>891.443</b>  | <b>446.225</b> | 8  | G   | 5  | <b>491.282</b>  | 246.145        |
| <b>1004.527</b> | <b>502.767</b> | 9  | I   | 4  | <b>434.261</b>  | 217.634        |
| <b>1091.559</b> | <b>546.283</b> | 10 | S   | 3  | <b>321.177</b>  | 161.092        |
| <b>1178.591</b> | <b>589.799</b> | 11 | S   | 2  | <b>234.145</b>  | 117.576        |
| 1306.686        | <b>653.847</b> | 12 | K   | 1  | 147.113         | 74.060         |



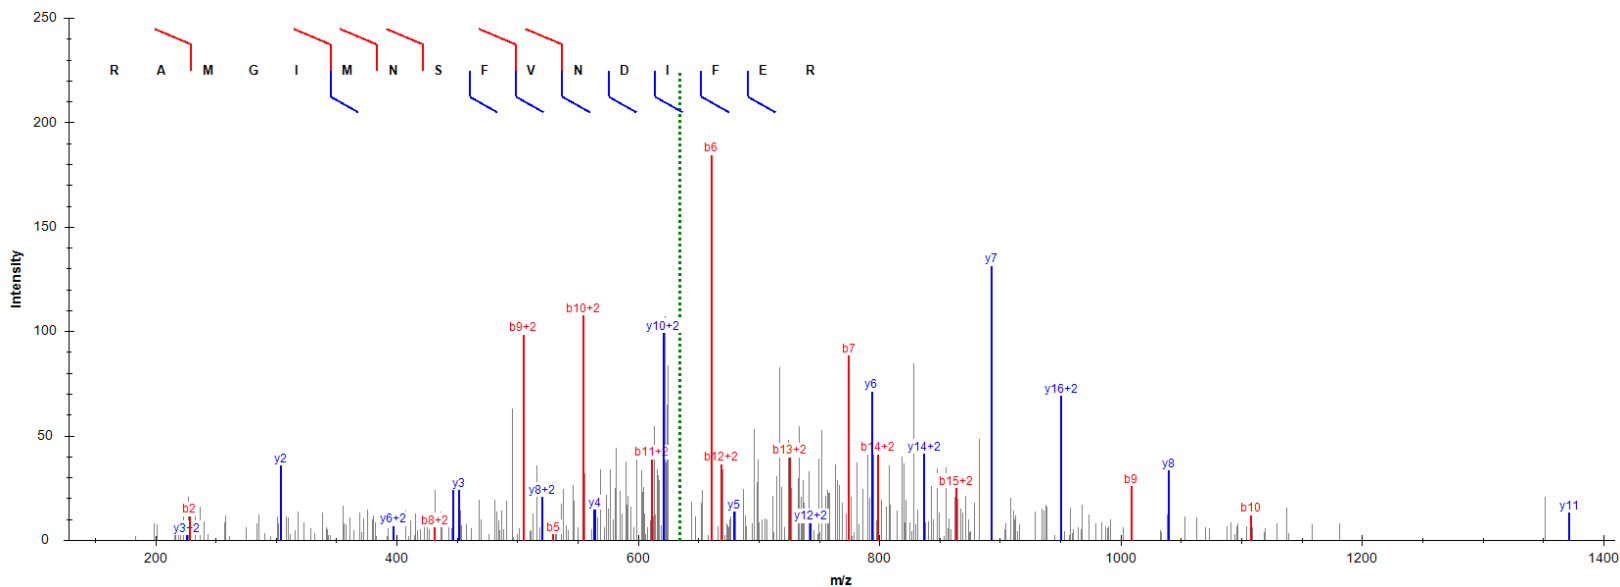

| <b>b</b>        | <b>b(+2)</b>   | <b>#</b> | <b>seq</b> | <b>#</b> | <b>y</b>        | <b>y(+2)</b>   |
|-----------------|----------------|----------|------------|----------|-----------------|----------------|
| 157.108         | 79.058         | 1        | R          | 16       | 1899.920        | <b>950.464</b> |
| <b>228.146</b>  | 114.576        | 2        | A          | 15       | 1743.819        | 872.413        |
| 359.186         | 180.097        | 3        | M          | 14       | 1672.782        | <b>836.895</b> |
| 416.207         | 208.607        | 4        | G          | 13       | 1541.742        | 771.374        |
| <b>529.292</b>  | 265.149        | 5        | I          | 12       | 1484.720        | <b>742.864</b> |
| <b>660.332</b>  | 330.670        | 6        | M          | 11       | <b>1371.636</b> | 686.322        |
| <b>774.375</b>  | 387.691        | 7        | N          | 10       | 1240.596        | <b>620.801</b> |
| 861.407         | <b>431.207</b> | 8        | S          | 9        | 1126.553        | <b>563.780</b> |
| <b>1008.475</b> | <b>504.741</b> | 9        | F          | 8        | <b>1039.521</b> | <b>520.264</b> |
| <b>1107.544</b> | <b>554.276</b> | 10       | V          | 7        | <b>892.452</b>  | <b>446.730</b> |
| 1221.587        | <b>611.297</b> | 11       | N          | 6        | <b>793.384</b>  | <b>397.196</b> |
| 1336.614        | <b>668.810</b> | 12       | D          | 5        | <b>679.341</b>  | 340.174        |
| 1449.698        | <b>725.352</b> | 13       | I          | 4        | <b>564.314</b>  | 282.661        |
| 1596.766        | <b>798.887</b> | 14       | F          | 3        | <b>451.230</b>  | <b>226.119</b> |
| 1725.809        | <b>863.408</b> | 15       | E          | 2        | <b>304.162</b>  | 152.584        |
| 1881.910        | 941.459        | 16       | R          | 1        | 175.119         | 88.063         |

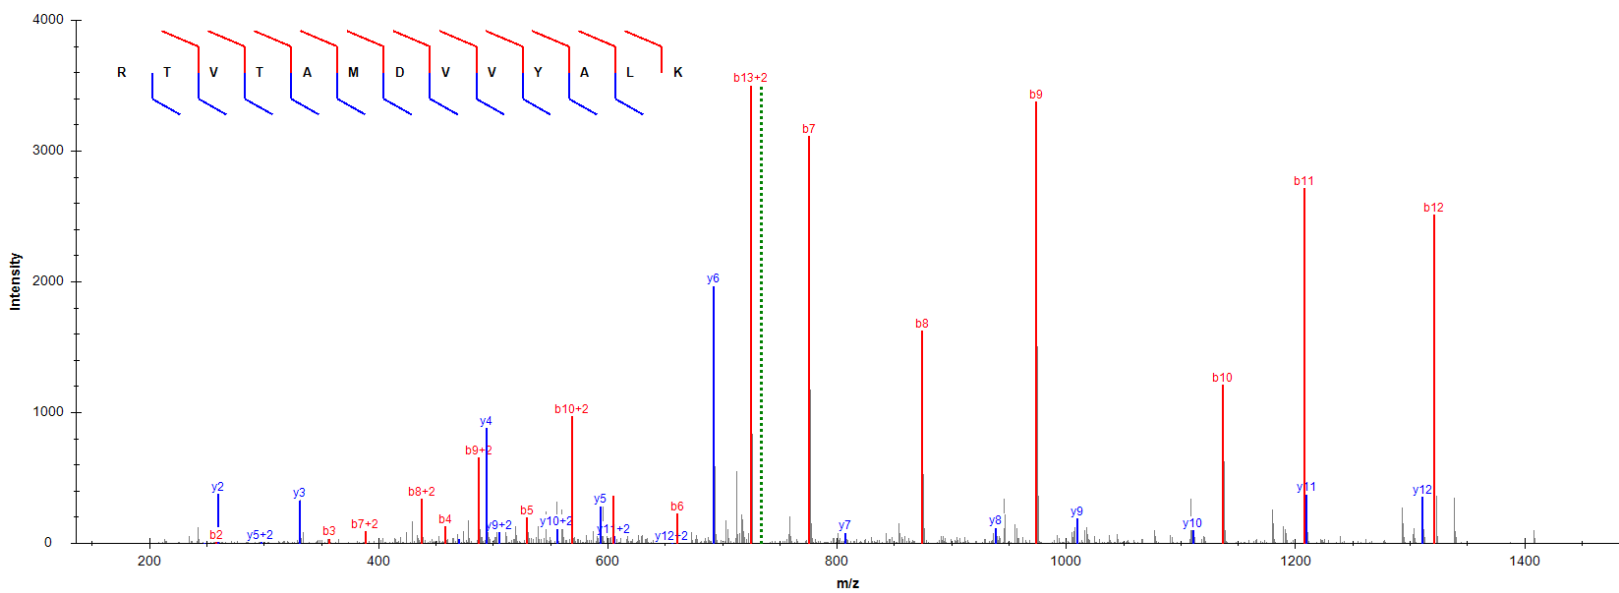

| b               | b(+2)          | #  | seq | #  | y               | y(+2)          |
|-----------------|----------------|----|-----|----|-----------------|----------------|
| 157.108         | 79.058         | 1  | R   | 13 | 1466.804        | 733.905        |
| <b>258.156</b>  | 129.582        | 2  | T   | 12 | <b>1310.702</b> | <b>655.855</b> |
| <b>357.224</b>  | 179.116        | 3  | V   | 11 | <b>1209.655</b> | <b>605.331</b> |
| <b>458.272</b>  | 229.640        | 4  | T   | 10 | <b>1110.586</b> | <b>555.797</b> |
| <b>529.309</b>  | 265.158        | 5  | A   | 9  | <b>1009.539</b> | <b>505.273</b> |
| <b>660.350</b>  | 330.679        | 6  | M   | 8  | <b>938.502</b>  | <b>469.754</b> |
| <b>775.377</b>  | <b>388.192</b> | 7  | D   | 7  | <b>807.461</b>  | 404.234        |
| <b>874.445</b>  | <b>437.726</b> | 8  | V   | 6  | <b>692.434</b>  | 346.721        |
| <b>973.514</b>  | <b>487.260</b> | 9  | V   | 5  | <b>593.366</b>  | <b>297.187</b> |
| <b>1136.577</b> | <b>568.792</b> | 10 | Y   | 4  | <b>494.297</b>  | <b>247.652</b> |
| <b>1207.614</b> | <b>604.311</b> | 11 | A   | 3  | <b>331.234</b>  | 166.121        |
| <b>1320.698</b> | <b>660.853</b> | 12 | L   | 2  | <b>260.197</b>  | 130.602        |
| 1448.793        | <b>724.900</b> | 13 | K   | 1  | 147.113         | 74.060         |

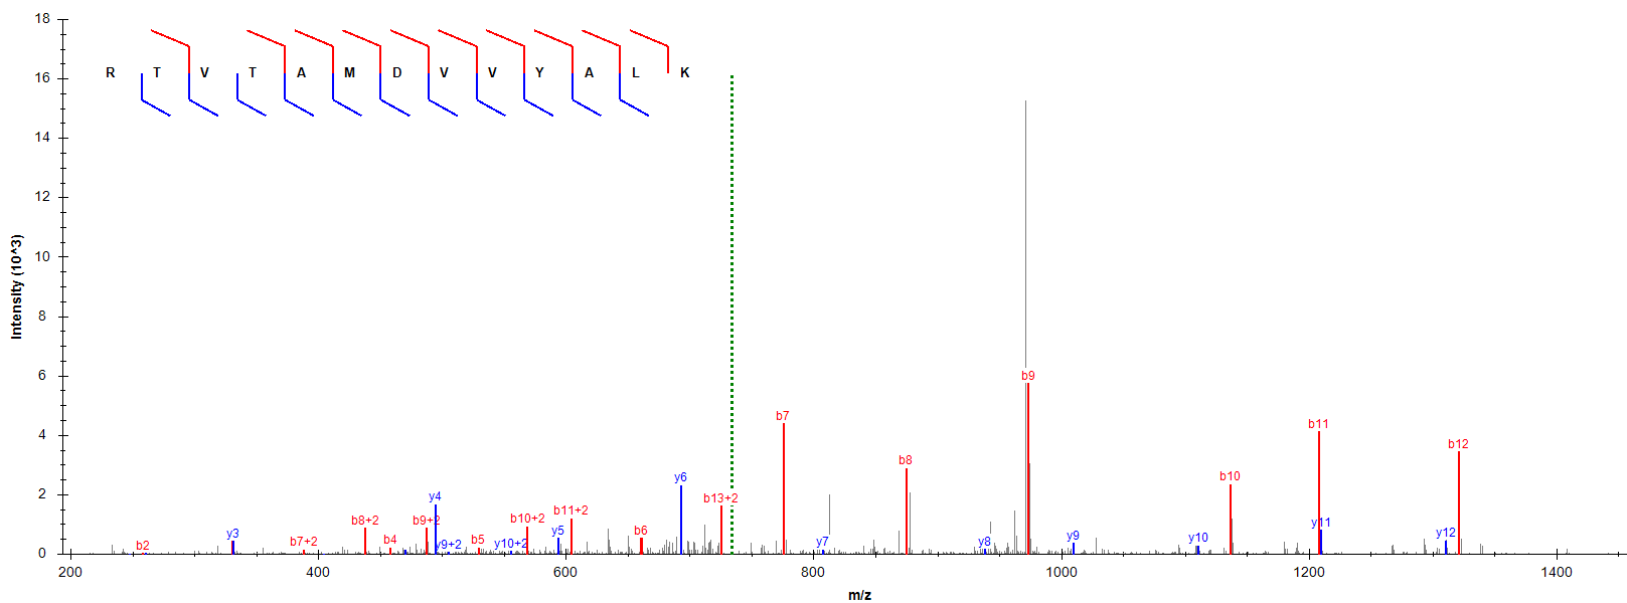

| <b>b</b>        | <b>b(+2)</b>   | <b>#</b> | <b>seq #</b> | <b>y</b> | <b>y(+2)</b>    |                |
|-----------------|----------------|----------|--------------|----------|-----------------|----------------|
| 157.108         | 79.058         | 1        | R            | 13       | 1466.804        | 733.905        |
| <b>258.156</b>  | 129.582        | 2        | T            | 12       | <b>1310.702</b> | 655.855        |
| 357.224         | 179.116        | 3        | V            | 11       | <b>1209.655</b> | 605.331        |
| <b>458.272</b>  | 229.640        | 4        | T            | 10       | <b>1110.586</b> | <b>555.797</b> |
| <b>529.309</b>  | 265.158        | 5        | A            | 9        | <b>1009.539</b> | <b>505.273</b> |
| <b>660.350</b>  | <b>330.679</b> | 6        | M            | 8        | <b>938.502</b>  | <b>469.754</b> |
| <b>775.377</b>  | <b>388.192</b> | 7        | D            | 7        | <b>807.461</b>  | <b>404.234</b> |
| <b>874.445</b>  | <b>437.726</b> | 8        | V            | 6        | <b>692.434</b>  | 346.721        |
| <b>973.514</b>  | <b>487.260</b> | 9        | V            | 5        | <b>593.366</b>  | 297.187        |
| <b>1136.577</b> | <b>568.792</b> | 10       | Y            | 4        | <b>494.297</b>  | <b>247.652</b> |
| <b>1207.614</b> | <b>604.311</b> | 11       | A            | 3        | <b>331.234</b>  | 166.121        |
| <b>1320.698</b> | <b>660.853</b> | 12       | L            | 2        | <b>260.197</b>  | 130.602        |
| 1448.793        | <b>724.900</b> | 13       | K            | 1        | 147.113         | 74.060         |

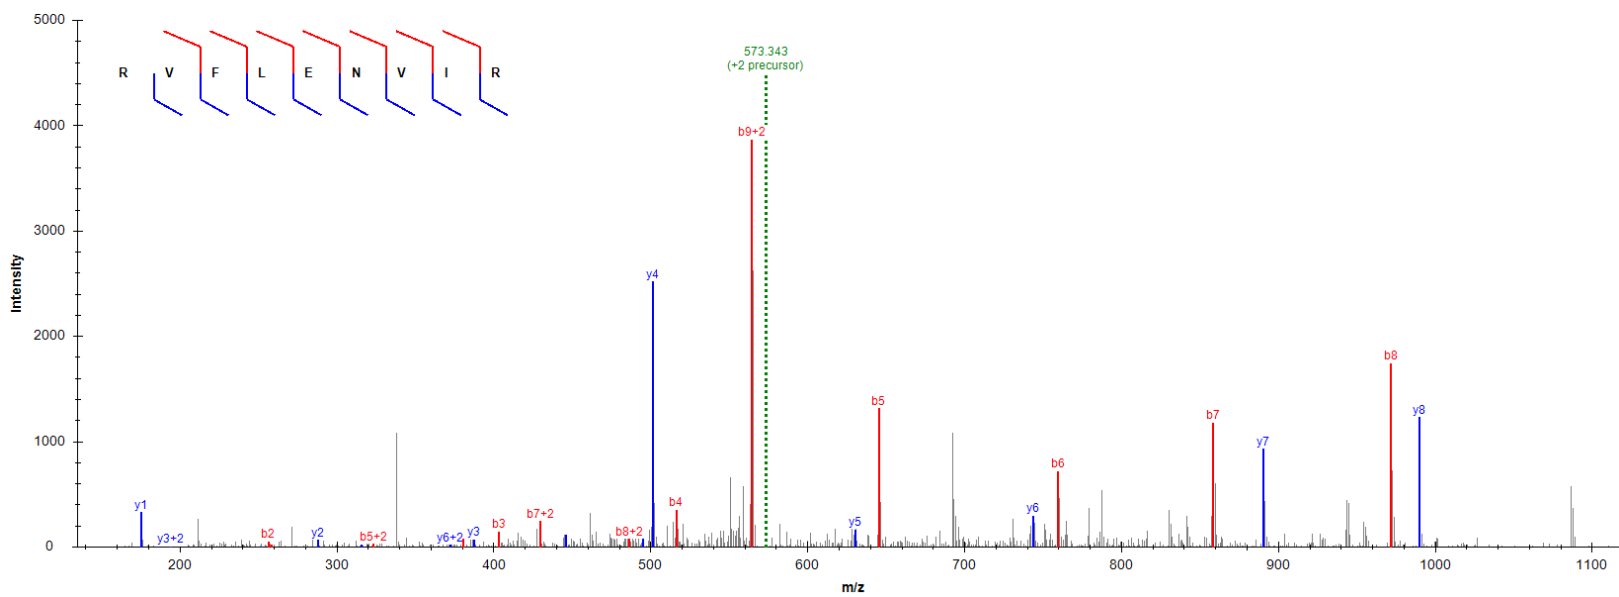

| <b>b</b>       | <b>b(+2)</b>   | <b>#</b> | <b>seq #</b> | <b>y</b> | <b>y(+2)</b>   |
|----------------|----------------|----------|--------------|----------|----------------|
| 157.108        | 79.058         | 1        | R            | 9        | 1145.679       |
| <b>256.177</b> | 128.592        | 2        | V            | 8        | <b>989.578</b> |
| <b>403.245</b> | 202.126        | 3        | F            | 7        | <b>890.509</b> |
| <b>516.329</b> | <b>258.668</b> | 4        | L            | 6        | <b>743.441</b> |
| <b>645.372</b> | <b>323.190</b> | 5        | E            | 5        | <b>630.357</b> |
| <b>759.415</b> | <b>380.211</b> | 6        | N            | 4        | <b>501.314</b> |
| <b>858.483</b> | <b>429.745</b> | 7        | V            | 3        | <b>387.271</b> |
| <b>971.567</b> | <b>486.287</b> | 8        | I            | 2        | <b>288.203</b> |
| 1127.668       | <b>564.338</b> | 9        | R            | 1        | <b>175.119</b> |

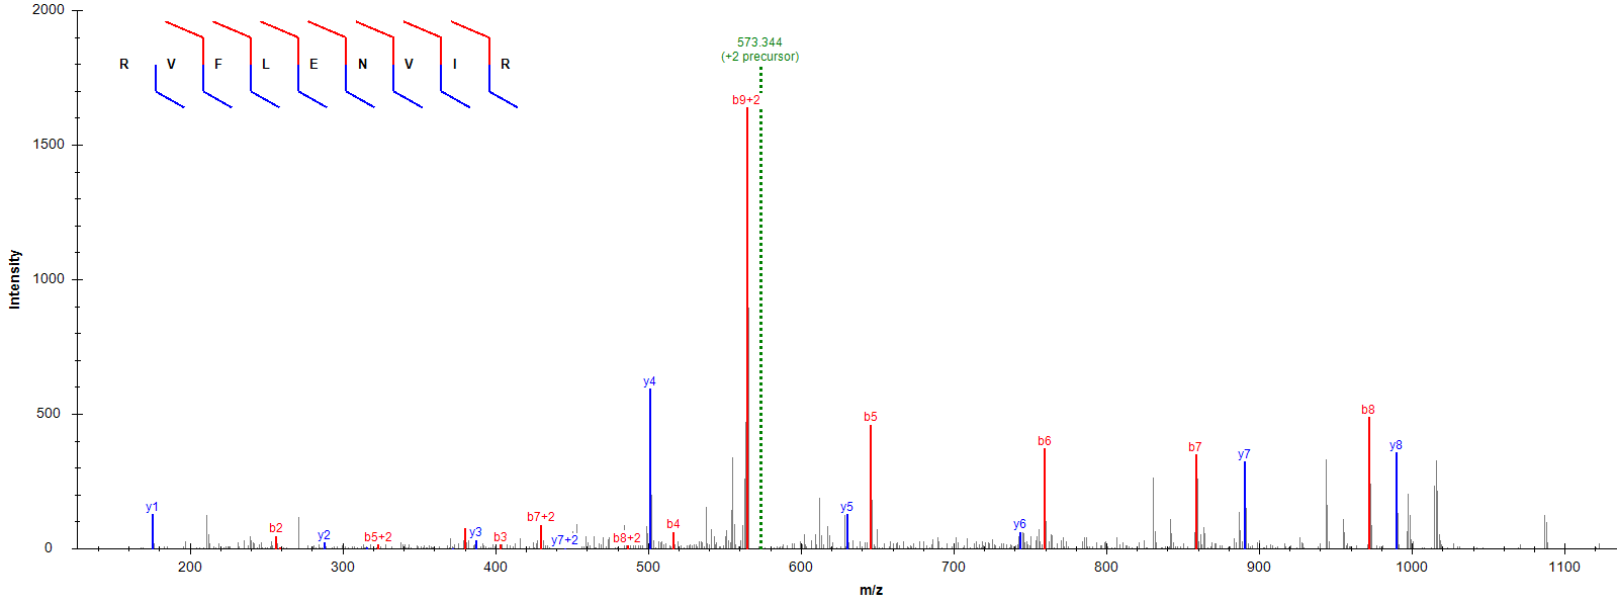

| b              | b(+2)          | # | seq | # | y              | y(+2)          |
|----------------|----------------|---|-----|---|----------------|----------------|
| 157.108        | 79.058         | 1 | R   | 9 | 1145.679       | 573.343        |
| <b>256.177</b> | 128.592        | 2 | V   | 8 | <b>989.578</b> | 495.293        |
| <b>403.245</b> | 202.126        | 3 | F   | 7 | <b>890.509</b> | <b>445.758</b> |
| <b>516.329</b> | <b>258.668</b> | 4 | L   | 6 | <b>743.441</b> | <b>372.224</b> |
| <b>645.372</b> | <b>323.190</b> | 5 | E   | 5 | <b>630.357</b> | <b>315.682</b> |
| <b>759.415</b> | <b>380.211</b> | 6 | N   | 4 | <b>501.314</b> | 251.161        |
| <b>858.483</b> | <b>429.745</b> | 7 | V   | 3 | <b>387.271</b> | 194.139        |
| <b>971.567</b> | <b>486.287</b> | 8 | I   | 2 | <b>288.203</b> | 144.605        |
| 1127.668       | <b>564.338</b> | 9 | R   | 1 | <b>175.119</b> | 88.063         |

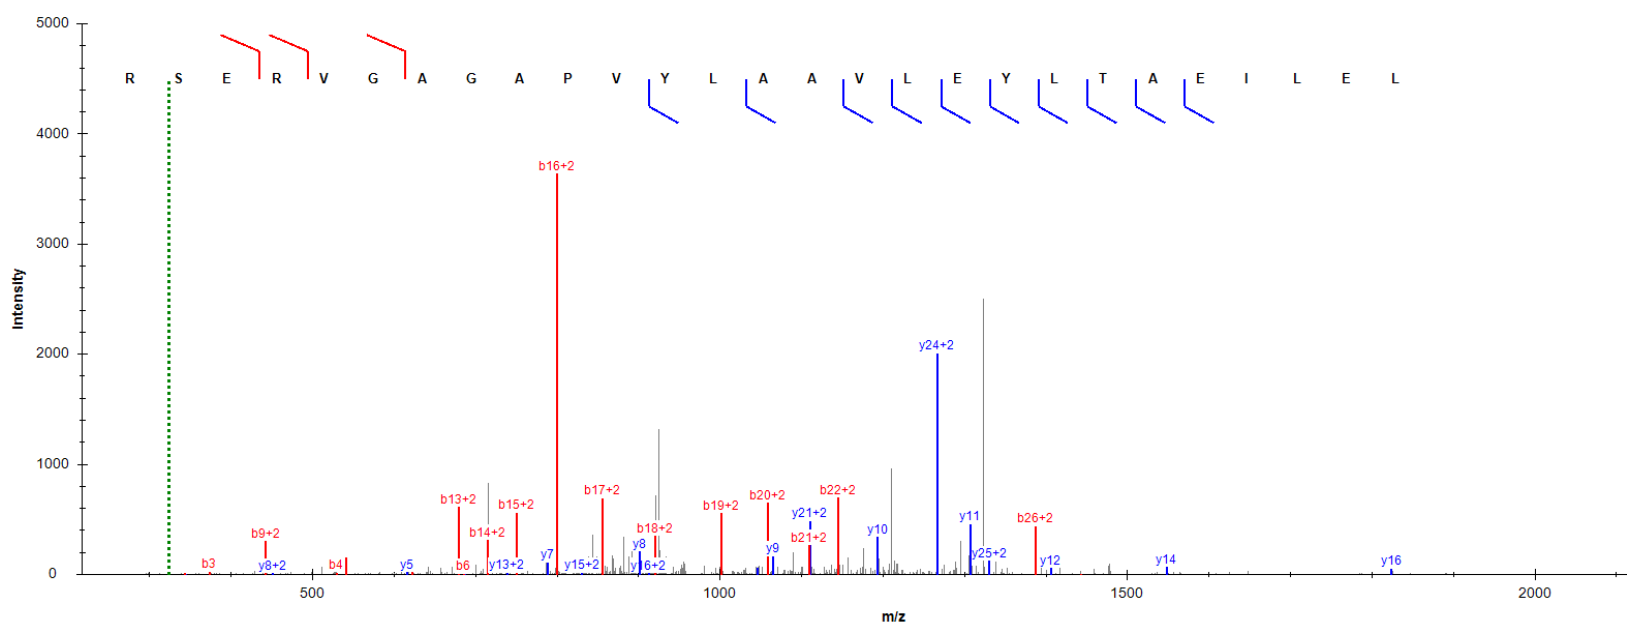

| b              | b(+2)           | #  | seq | #  | y               | y(+2)           |
|----------------|-----------------|----|-----|----|-----------------|-----------------|
| 157.108        | 79.058          | 1  | R   | 27 | 2903.588        | 1452.297        |
| 244.140        | 122.574         | 2  | S   | 26 | 2747.487        | 1374.247        |
| <b>373.183</b> | 187.095         | 3  | E   | 25 | 2660.455        | <b>1330.731</b> |
| <b>529.284</b> | 265.146         | 4  | R   | 24 | 2531.412        | <b>1266.210</b> |
| 628.353        | 314.680         | 5  | V   | 23 | 2375.311        | 1188.159        |
| <b>685.374</b> | <b>343.191</b>  | 6  | G   | 22 | 2276.242        | 1138.625        |
| 756.411        | 378.709         | 7  | A   | 21 | 2219.221        | <b>1110.114</b> |
| 813.433        | 407.220         | 8  | G   | 20 | 2148.184        | 1074.596        |
| 884.470        | <b>442.738</b>  | 9  | A   | 19 | 2091.162        | <b>1046.085</b> |
| 981.522        | 491.265         | 10 | P   | 18 | 2020.125        | 1010.566        |
| 1080.591       | <b>540.799</b>  | 11 | V   | 17 | 1923.073        | 962.040         |
| 1243.654       | <b>622.331</b>  | 12 | Y   | 16 | <b>1824.004</b> | <b>912.506</b>  |
| 1356.738       | <b>678.873</b>  | 13 | L   | 15 | 1660.941        | <b>830.974</b>  |
| 1427.775       | <b>714.391</b>  | 14 | A   | 14 | <b>1547.857</b> | 774.432         |
| 1498.812       | <b>749.910</b>  | 15 | A   | 13 | 1476.820        | <b>738.913</b>  |
| 1597.881       | <b>799.444</b>  | 16 | V   | 12 | <b>1405.782</b> | 703.395         |
| 1710.965       | <b>855.986</b>  | 17 | L   | 11 | <b>1306.714</b> | 653.861         |
| 1840.008       | <b>920.507</b>  | 18 | E   | 10 | <b>1193.630</b> | 597.319         |
| 2003.071       | <b>1002.039</b> | 19 | Y   | 9  | <b>1064.587</b> | 532.797         |
| 2116.155       | <b>1058.581</b> | 20 | L   | 8  | <b>901.524</b>  | <b>451.266</b>  |
| 2217.203       | <b>1109.105</b> | 21 | T   | 7  | <b>788.440</b>  | 394.724         |

|          |                 |    |   |   |                |                |
|----------|-----------------|----|---|---|----------------|----------------|
| 2288.240 | <b>1144.624</b> | 22 | A | 6 | <b>687.392</b> | <b>344.200</b> |
| 2417.282 | 1209.145        | 23 | E | 5 | <b>616.355</b> | 308.681        |
| 2530.366 | 1265.687        | 24 | I | 4 | 487.313        | 244.160        |
| 2643.450 | 1322.229        | 25 | L | 3 | 374.229        | 187.618        |
| 2772.493 | <b>1386.750</b> | 26 | E | 2 | 261.144        | 131.076        |
| 2885.577 | <b>1443.292</b> | 27 | L | 1 | 132.102        | 66.555         |

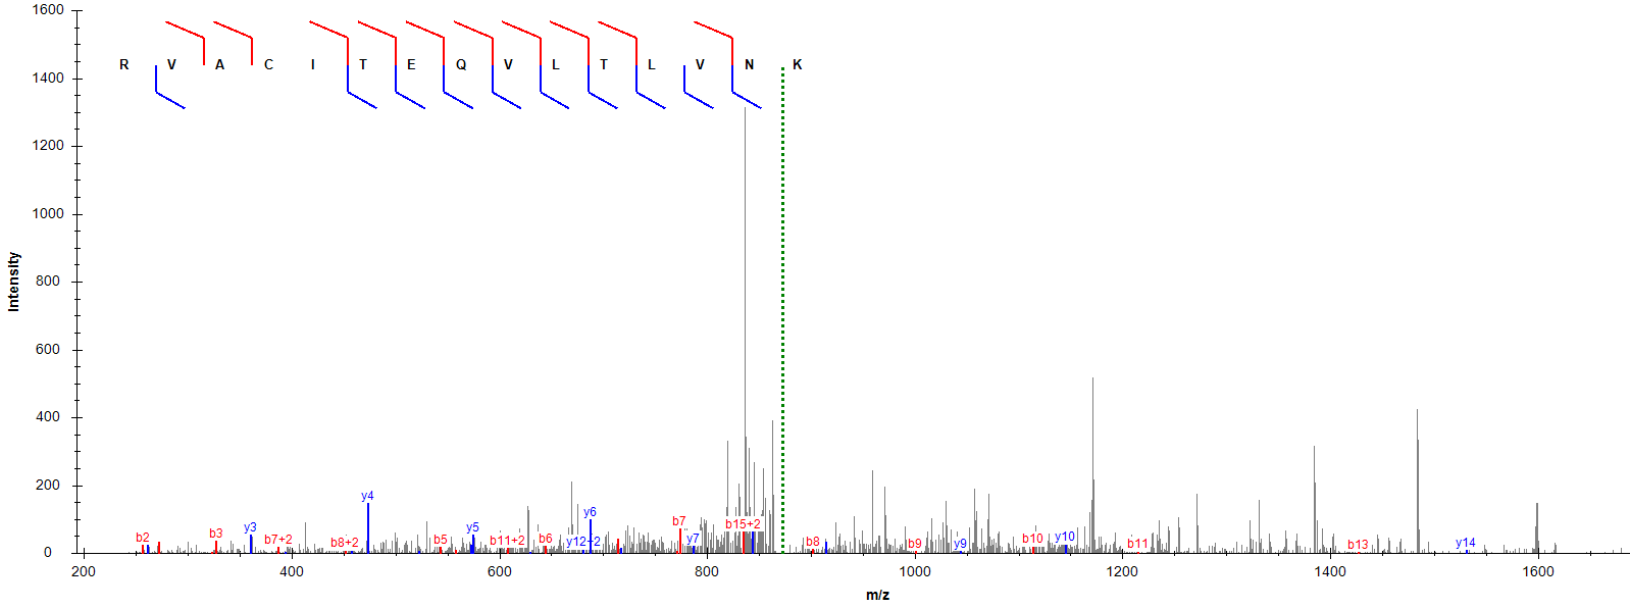

| b               | b(+2)          | #  | seq | #  | y               | y(+2)          |
|-----------------|----------------|----|-----|----|-----------------|----------------|
| 157.108         | 79.058         | 1  | R   | 15 | 1686.957        | <b>843.982</b> |
| <b>256.177</b>  | 128.592        | 2  | V   | 14 | <b>1530.856</b> | 765.932        |
| <b>327.214</b>  | 164.111        | 3  | A   | 13 | 1431.788        | <b>716.397</b> |
| 430.223         | 215.615        | 4  | C   | 12 | 1360.750        | <b>680.879</b> |
| <b>543.307</b>  | <b>272.157</b> | 5  | I   | 11 | 1257.741        | <b>629.374</b> |
| <b>644.355</b>  | <b>322.681</b> | 6  | T   | 10 | <b>1144.657</b> | <b>572.832</b> |
| <b>773.397</b>  | <b>387.202</b> | 7  | E   | 9  | <b>1043.610</b> | <b>522.308</b> |
| <b>901.456</b>  | <b>451.232</b> | 8  | Q   | 8  | <b>914.567</b>  | <b>457.787</b> |
| <b>1000.524</b> | 500.766        | 9  | V   | 7  | <b>786.508</b>  | <b>393.758</b> |
| <b>1113.608</b> | <b>557.308</b> | 10 | L   | 6  | <b>687.440</b>  | 344.224        |
| <b>1214.656</b> | <b>607.832</b> | 11 | T   | 5  | <b>574.356</b>  | 287.682        |
| 1327.740        | 664.374        | 12 | L   | 4  | <b>473.308</b>  | 237.158        |
| <b>1426.809</b> | <b>713.908</b> | 13 | V   | 3  | <b>360.224</b>  | 180.616        |
| 1540.852        | <b>770.929</b> | 14 | N   | 2  | <b>261.156</b>  | 131.082        |
| 1668.947        | <b>834.977</b> | 15 | K   | 1  | 147.113         | 74.060         |



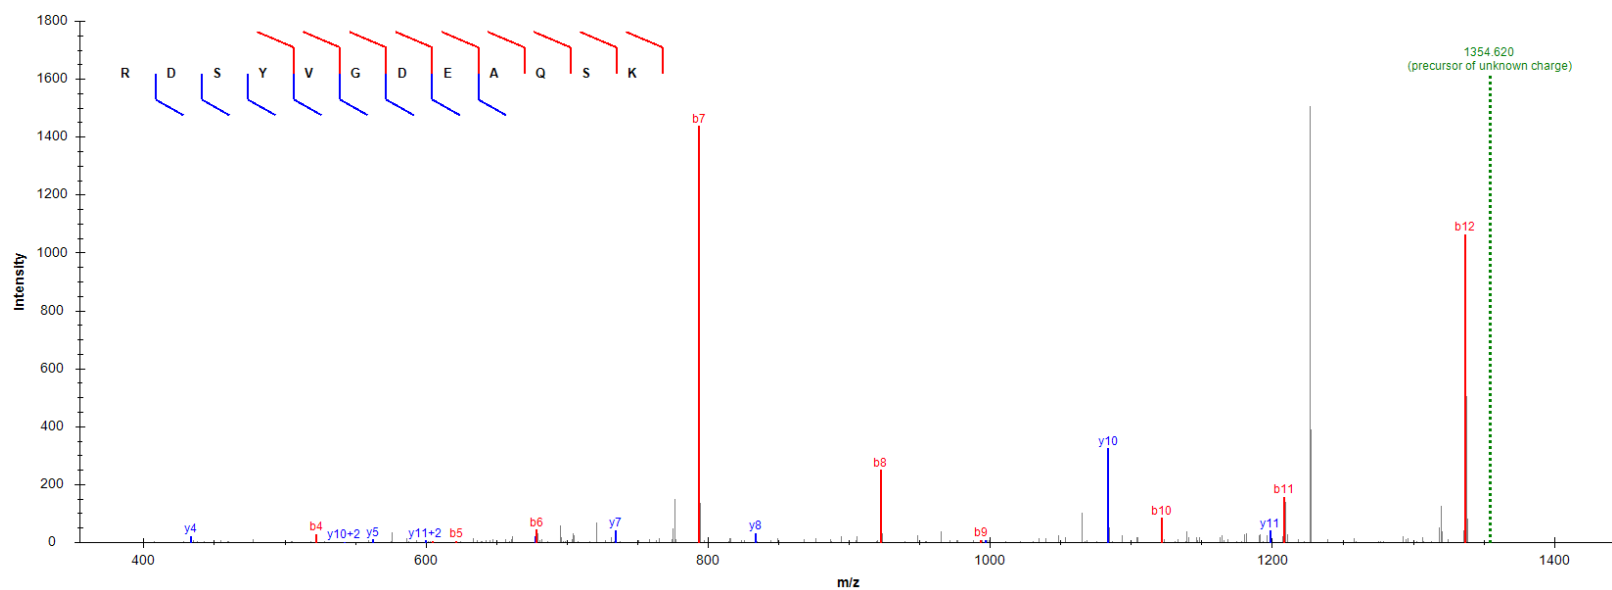

| <b>b</b>        | <b>b(+2)</b>   | <b>#</b> | <b>seq</b> | <b>#</b> | <b>y</b>        | <b>y(+2)</b>   |
|-----------------|----------------|----------|------------|----------|-----------------|----------------|
| 157.108         | 79.058         | 1        | R          | 12       | 1354.623        | <b>677.815</b> |
| 272.135         | 136.571        | 2        | D          | 11       | <b>1198.522</b> | <b>599.765</b> |
| 359.167         | 180.087        | 3        | S          | 10       | <b>1083.495</b> | <b>542.251</b> |
| <b>522.231</b>  | 261.619        | 4        | Y          | 9        | <b>996.463</b>  | 498.735        |
| <b>621.299</b>  | 311.153        | 5        | V          | 8        | <b>833.400</b>  | 417.204        |
| <b>678.321</b>  | 339.664        | 6        | G          | 7        | <b>734.332</b>  | 367.669        |
| <b>793.348</b>  | 397.177        | 7        | D          | 6        | <b>677.310</b>  | 339.159        |
| <b>922.390</b>  | 461.699        | 8        | E          | 5        | <b>562.283</b>  | 281.645        |
| <b>993.427</b>  | 497.217        | 9        | A          | 4        | <b>433.241</b>  | 217.124        |
| <b>1121.486</b> | 561.247        | 10       | Q          | 3        | 362.203         | 181.605        |
| <b>1208.518</b> | <b>604.763</b> | 11       | S          | 2        | 234.145         | 117.576        |
| <b>1336.613</b> | 668.810        | 12       | K          | 1        | 147.113         | 74.060         |

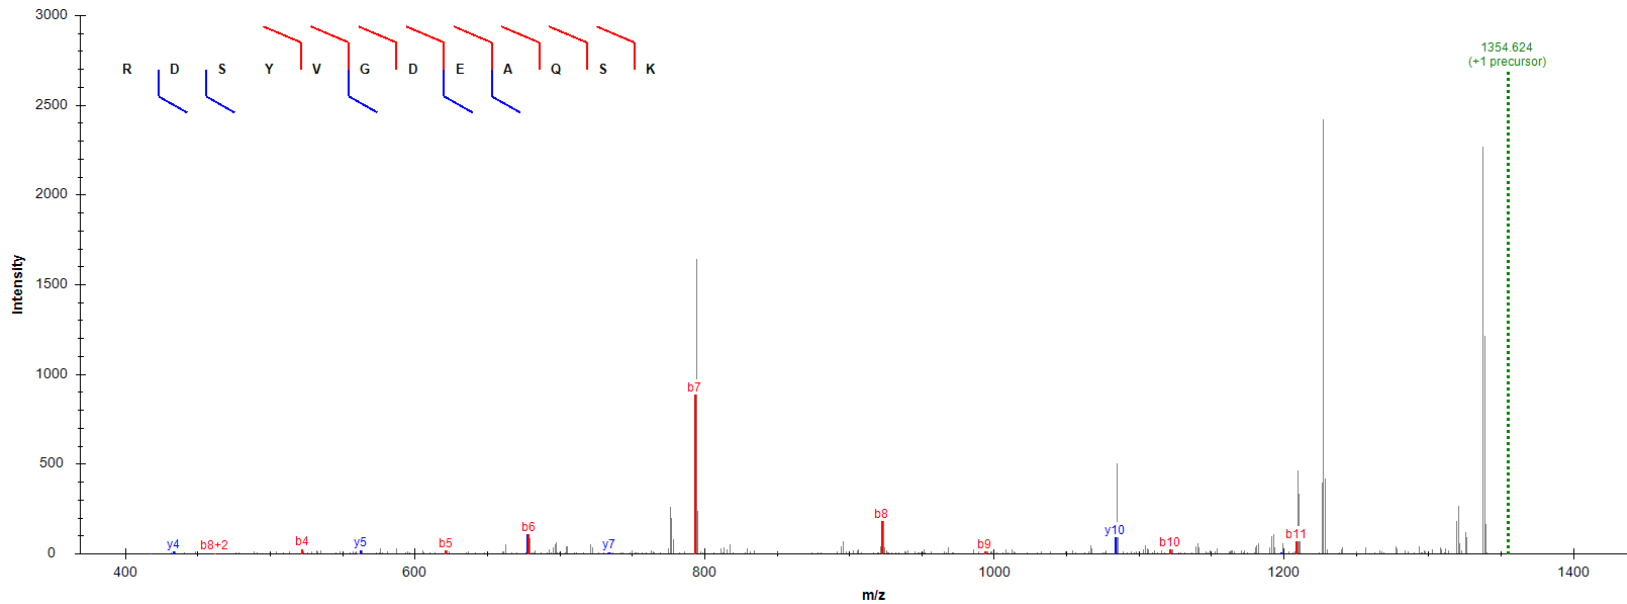

| b               | b(+2)          | #  | seq | #  | y               | y(+2)          |
|-----------------|----------------|----|-----|----|-----------------|----------------|
| 157.108         | 79.058         | 1  | R   | 12 | 1354.623        | <b>677.815</b> |
| 272.135         | 136.571        | 2  | D   | 11 | <b>1198.522</b> | 599.765        |
| 359.167         | 180.087        | 3  | S   | 10 | <b>1083.495</b> | 542.251        |
| <b>522.231</b>  | 261.619        | 4  | Y   | 9  | 996.463         | 498.735        |
| <b>621.299</b>  | 311.153        | 5  | V   | 8  | 833.400         | <b>417.204</b> |
| <b>678.321</b>  | 339.664        | 6  | G   | 7  | <b>734.332</b>  | 367.669        |
| <b>793.348</b>  | 397.177        | 7  | D   | 6  | 677.310         | 339.159        |
| <b>922.390</b>  | <b>461.699</b> | 8  | E   | 5  | <b>562.283</b>  | 281.645        |
| <b>993.427</b>  | 497.217        | 9  | A   | 4  | <b>433.241</b>  | 217.124        |
| <b>1121.486</b> | <b>561.247</b> | 10 | Q   | 3  | 362.203         | 181.605        |
| <b>1208.518</b> | 604.763        | 11 | S   | 2  | 234.145         | 117.576        |
| 1336.613        | 668.810        | 12 | K   | 1  | 147.113         | 74.060         |

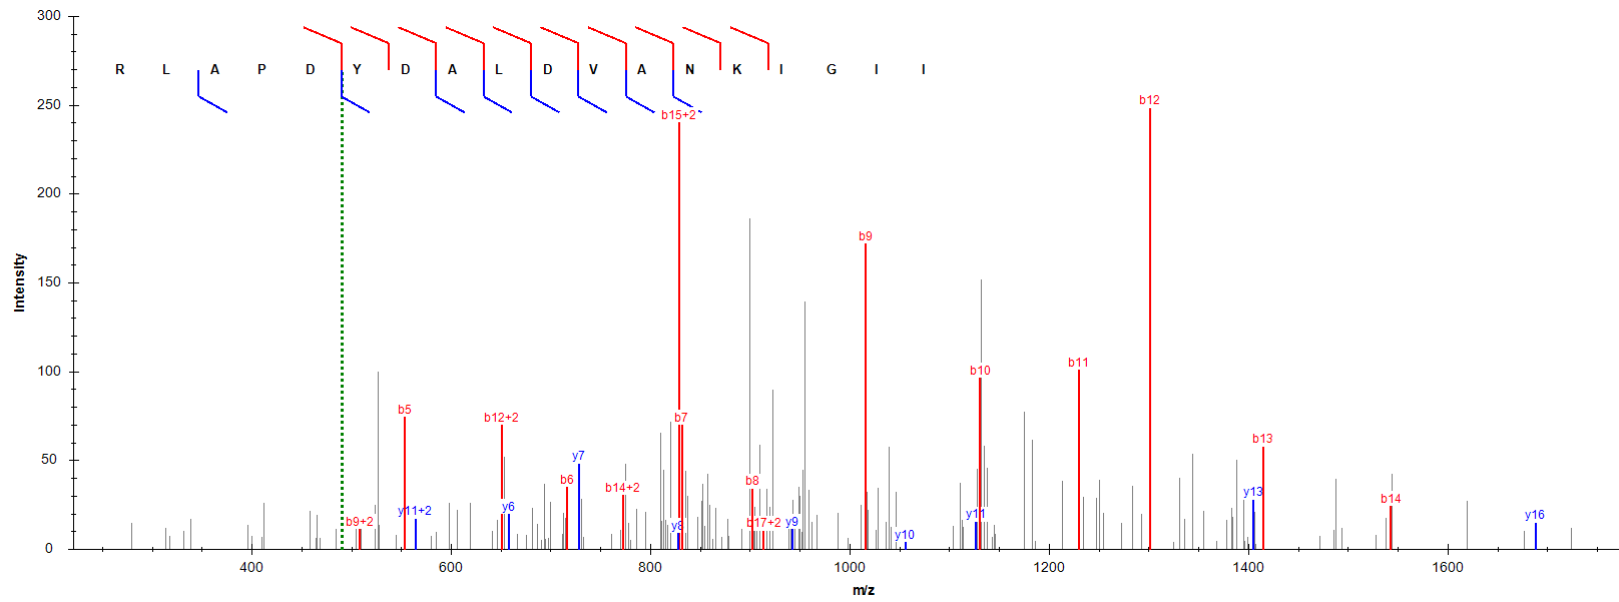

| <b>b</b>        | <b>b(+2)</b>   | <b>#</b> | <b>seq #</b> | <b>y</b> | <b>y(+2)</b>                   |
|-----------------|----------------|----------|--------------|----------|--------------------------------|
| 157.108         | 79.058         | 1        | R            | 18       | 1957.075 979.041               |
| 270.192         | 135.600        | 2        | L            | 17       | 1800.974 900.991               |
| 341.230         | 171.118        | 3        | A            | 16       | <b>1687.890</b> 844.449        |
| 438.282         | 219.645        | 4        | P            | 15       | 1616.853 808.930               |
| <b>553.309</b>  | 277.158        | 5        | D            | 14       | 1519.800 760.404               |
| <b>716.373</b>  | 358.690        | 6        | Y            | 13       | <b>1404.773</b> 702.890        |
| <b>831.400</b>  | 416.203        | 7        | D            | 12       | 1241.710 621.359               |
| <b>902.437</b>  | 451.722        | 8        | A            | 11       | <b>1126.683</b> <b>563.845</b> |
| <b>1015.521</b> | <b>508.264</b> | 9        | L            | 10       | <b>1055.646</b> 528.327        |
| <b>1130.548</b> | 565.777        | 10       | D            | 9        | <b>942.562</b> 471.785         |
| <b>1229.616</b> | 615.312        | 11       | V            | 8        | <b>827.535</b> 414.271         |
| <b>1300.653</b> | <b>650.830</b> | 12       | A            | 7        | <b>728.467</b> 364.737         |
| <b>1414.696</b> | 707.852        | 13       | N            | 6        | <b>657.429</b> 329.218         |
| <b>1542.791</b> | <b>771.899</b> | 14       | K            | 5        | 543.386 272.197                |
| 1655.875        | <b>828.441</b> | 15       | I            | 4        | 415.291 208.149                |
| 1712.897        | 856.952        | 16       | G            | 3        | 302.207 151.607                |
| 1825.981        | <b>913.494</b> | 17       | I            | 2        | 245.186 123.097                |
| 1939.065        | 970.036        | 18       | I            | 1        | 132.102 66.555                 |

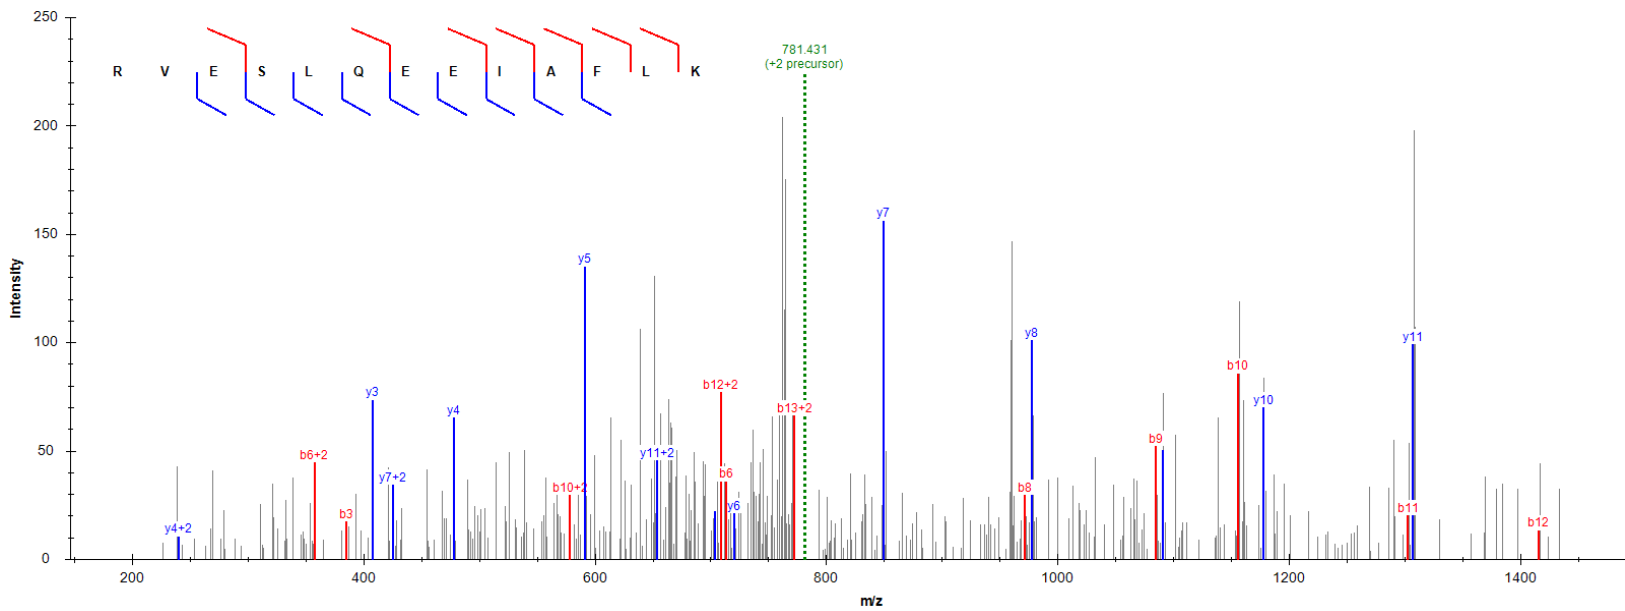

| b               | b(+2)          | #  | seq | #  | y               | y(+2)          |
|-----------------|----------------|----|-----|----|-----------------|----------------|
| 157.108         | 79.058         | 1  | R   | 13 | 1561.858        | 781.433        |
| 256.177         | 128.592        | 2  | V   | 12 | 1405.757        | <b>703.382</b> |
| <b>385.219</b>  | 193.113        | 3  | E   | 11 | <b>1306.689</b> | <b>653.848</b> |
| 472.251         | 236.629        | 4  | S   | 10 | <b>1177.646</b> | 589.327        |
| 585.335         | 293.171        | 5  | L   | 9  | <b>1090.614</b> | 545.811        |
| <b>713.394</b>  | <b>357.201</b> | 6  | Q   | 8  | <b>977.530</b>  | 489.269        |
| 842.437         | 421.722        | 7  | E   | 7  | <b>849.472</b>  | <b>425.239</b> |
| <b>971.479</b>  | 486.243        | 8  | E   | 6  | <b>720.429</b>  | 360.718        |
| <b>1084.563</b> | 542.785        | 9  | I   | 5  | <b>591.386</b>  | 296.197        |
| <b>1155.600</b> | <b>578.304</b> | 10 | A   | 4  | <b>478.302</b>  | <b>239.655</b> |
| <b>1302.669</b> | 651.838        | 11 | F   | 3  | <b>407.265</b>  | 204.136        |
| <b>1415.753</b> | <b>708.380</b> | 12 | L   | 2  | 260.197         | 130.602        |
| 1543.848        | <b>772.428</b> | 13 | K   | 1  | 147.113         | 74.060         |

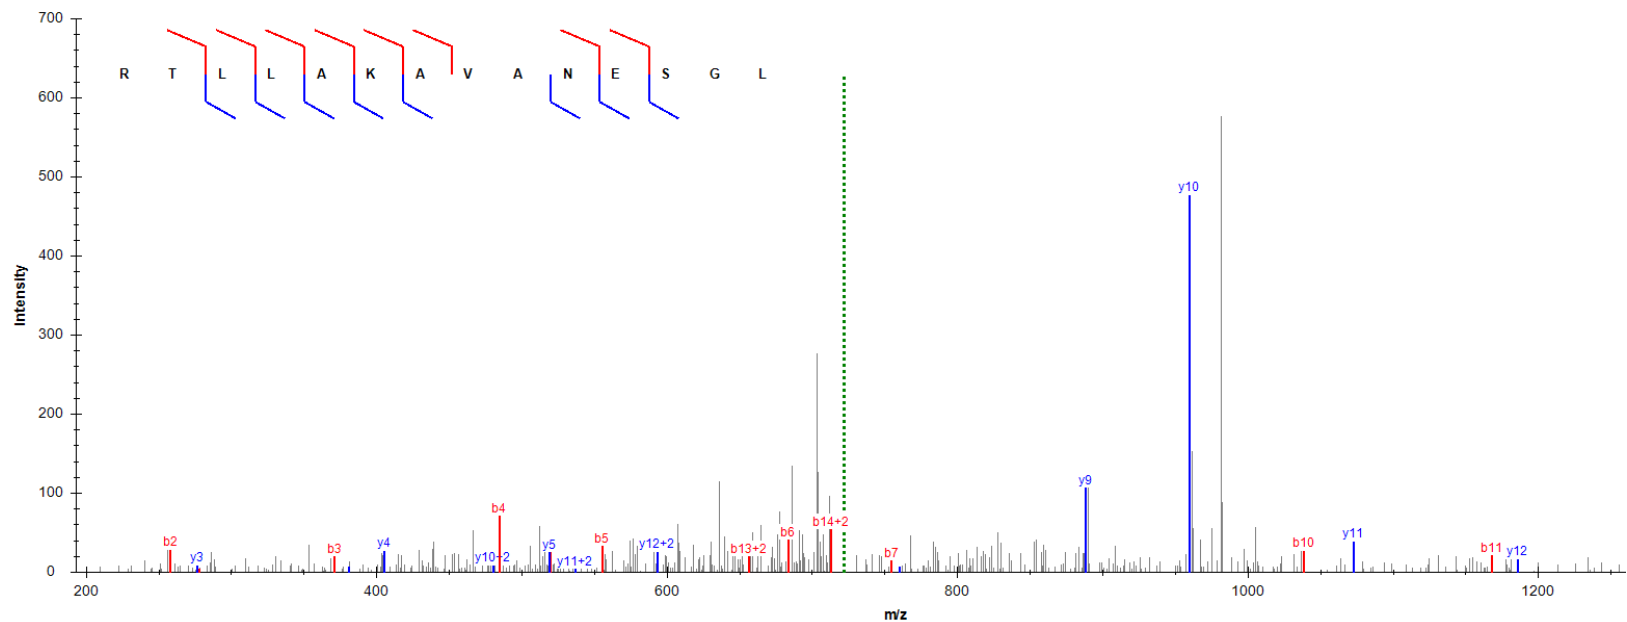

| <b>b</b>        | <b>b(+2)</b>   | <b>#</b> | <b>seq</b> | <b>#</b> | <b>y</b>        | <b>y(+2)</b>   |
|-----------------|----------------|----------|------------|----------|-----------------|----------------|
| 157.108         | 79.058         | 1        | R          | 14       | 1442.833        | 721.920        |
| <b>258.156</b>  | 129.582        | 2        | T          | 13       | 1286.731        | 643.869        |
| <b>371.240</b>  | 186.124        | 3        | L          | 12       | <b>1185.684</b> | <b>593.346</b> |
| <b>484.324</b>  | 242.666        | 4        | L          | 11       | <b>1072.600</b> | <b>536.803</b> |
| <b>555.361</b>  | <b>278.184</b> | 5        | A          | 10       | <b>959.516</b>  | <b>480.261</b> |
| <b>683.456</b>  | 342.232        | 6        | K          | 9        | <b>888.479</b>  | 444.743        |
| <b>754.493</b>  | 377.750        | 7        | A          | 8        | <b>760.384</b>  | <b>380.695</b> |
| 853.562         | 427.285        | 8        | V          | 7        | 689.346         | 345.177        |
| 924.599         | 462.803        | 9        | A          | 6        | 590.278         | 295.643        |
| <b>1038.642</b> | <b>519.825</b> | 10       | N          | 5        | <b>519.241</b>  | 260.124        |
| <b>1167.684</b> | 584.346        | 11       | E          | 4        | <b>405.198</b>  | 203.103        |
| 1254.716        | 627.862        | 12       | S          | 3        | <b>276.155</b>  | 138.581        |
| 1311.738        | <b>656.373</b> | 13       | G          | 2        | 189.123         | 95.065         |
| 1424.822        | <b>712.915</b> | 14       | L          | 1        | 132.102         | 66.555         |

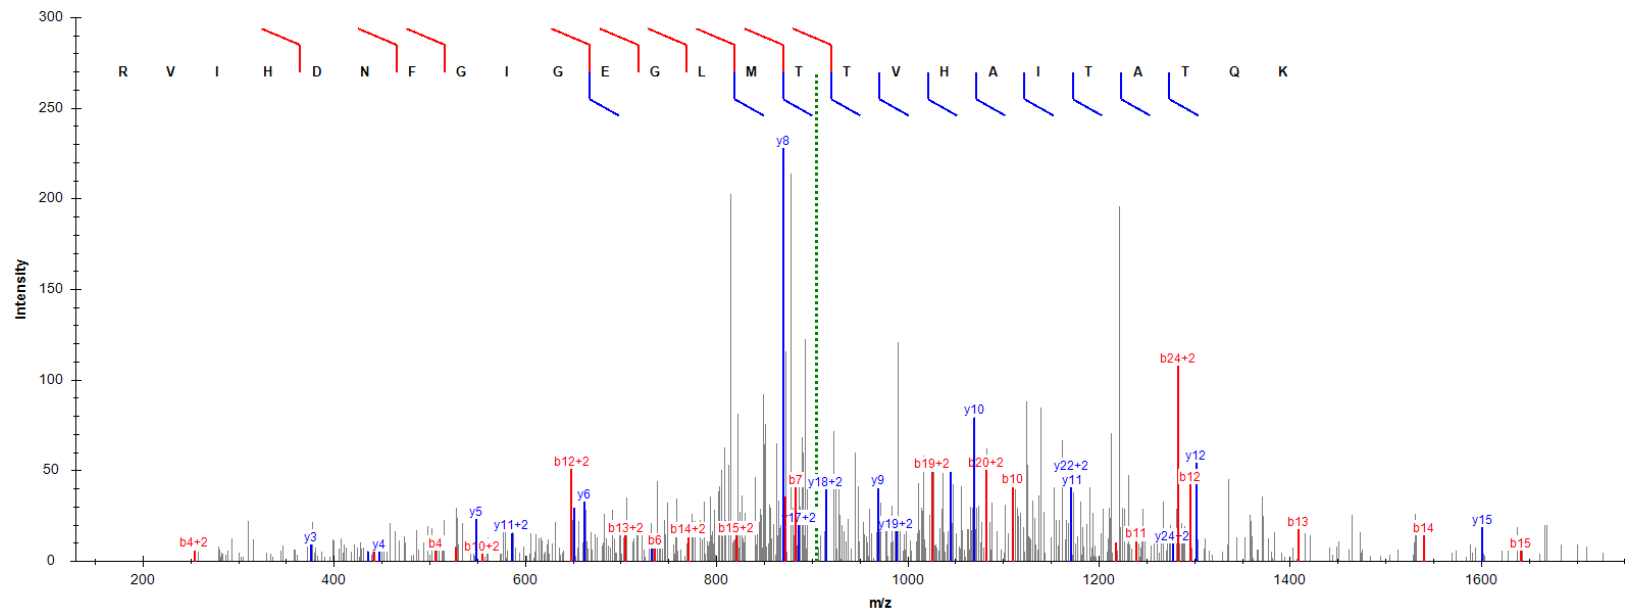

| b               | b(+2)           | #  | seq | #  | y               | y(+2)           |
|-----------------|-----------------|----|-----|----|-----------------|-----------------|
| 157.108         | 79.058          | 1  | R   | 25 | 2709.414        | 1355.211        |
| 256.177         | 128.592         | 2  | V   | 24 | 2553.313        | <b>1277.160</b> |
| 369.261         | 185.134         | 3  | I   | 23 | 2454.245        | 1227.626        |
| <b>506.320</b>  | <b>253.664</b>  | 4  | H   | 22 | 2341.161        | <b>1171.084</b> |
| 621.347         | 311.177         | 5  | D   | 21 | 2204.102        | 1102.554        |
| <b>735.390</b>  | 368.198         | 6  | N   | 20 | 2089.075        | <b>1045.041</b> |
| <b>882.458</b>  | <b>441.733</b>  | 7  | F   | 19 | 1975.032        | <b>988.020</b>  |
| 939.480         | 470.243         | 8  | G   | 18 | 1827.963        | <b>914.485</b>  |
| 1052.564        | <b>526.785</b>  | 9  | I   | 17 | 1770.942        | <b>885.975</b>  |
| <b>1109.585</b> | <b>555.296</b>  | 10 | G   | 16 | 1657.858        | 829.433         |
| <b>1238.628</b> | 619.817         | 11 | E   | 15 | <b>1600.836</b> | 800.922         |
| <b>1295.649</b> | <b>648.328</b>  | 12 | G   | 14 | 1471.794        | 736.401         |
| <b>1408.733</b> | <b>704.870</b>  | 13 | L   | 13 | 1414.772        | 707.890         |
| <b>1539.774</b> | <b>770.390</b>  | 14 | M   | 12 | <b>1301.688</b> | <b>651.348</b>  |
| <b>1640.821</b> | <b>820.914</b>  | 15 | T   | 11 | <b>1170.648</b> | <b>585.827</b>  |
| 1741.869        | <b>871.438</b>  | 16 | T   | 10 | <b>1069.600</b> | 535.304         |
| 1840.937        | 920.972         | 17 | V   | 9  | <b>968.552</b>  | 484.780         |
| 1977.996        | 989.502         | 18 | H   | 8  | <b>869.484</b>  | <b>435.246</b>  |
| 2049.033        | <b>1025.020</b> | 19 | A   | 7  | <b>732.425</b>  | 366.716         |
| 2162.118        | <b>1081.562</b> | 20 | I   | 6  | <b>661.388</b>  | 331.198         |
| 2263.165        | 1132.086        | 21 | T   | 5  | <b>548.304</b>  | 274.656         |
| 2334.202        | 1167.605        | 22 | A   | 4  | <b>447.256</b>  | 224.132         |

|          |                 |    |   |   |                |         |
|----------|-----------------|----|---|---|----------------|---------|
| 2435.250 | <b>1218.129</b> | 23 | T | 3 | <b>376.219</b> | 188.613 |
| 2563.309 | <b>1282.158</b> | 24 | Q | 2 | 275.171        | 138.089 |
| 2691.404 | 1346.205        | 25 | K | 1 | 147.113        | 74.060  |

Saha\_et\_al\_Figure S1

Natural peptide

R\*\* SPCCIVTSTYGWTANMER

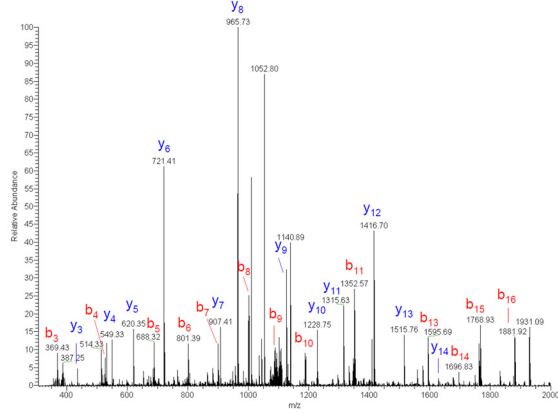

Synthetic peptide

R\*\* SPCCIVTSTYGWTANMER

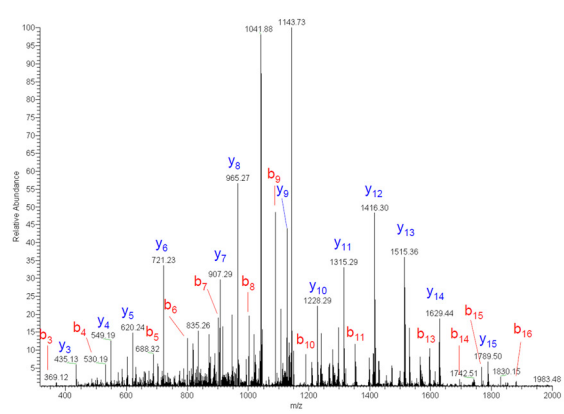

| b               | b(+2)           | #  | seq | #  | y               | y(+2)           |
|-----------------|-----------------|----|-----|----|-----------------|-----------------|
| 185.140         | 93.073          | 1  | R   | 19 | 2203.009        | <b>1102.008</b> |
| 272.172         | 136.589         | 2  | S   | 18 | 2018.877        | <b>1009.942</b> |
| <b>369.224</b>  | 185.116         | 3  | P   | 17 | <b>1931.845</b> | <b>966.426</b>  |
| 472.234         | 236.620         | 4  | C   | 16 | <b>1834.792</b> | <b>917.900</b>  |
| <b>575.243</b>  | 288.125         | 5  | C   | 15 | <b>1731.783</b> | <b>866.395</b>  |
| <b>688.327</b>  | 344.667         | 6  | I   | 14 | <b>1628.774</b> | <b>814.890</b>  |
| <b>787.395</b>  | 394.201         | 7  | V   | 13 | <b>1515.690</b> | <b>758.348</b>  |
| <b>888.443</b>  | <b>444.725</b>  | 8  | T   | 12 | <b>1416.621</b> | <b>708.814</b>  |
| <b>975.475</b>  | <b>488.241</b>  | 9  | S   | 11 | <b>1315.574</b> | <b>658.290</b>  |
| <b>1076.523</b> | <b>538.765</b>  | 10 | T   | 10 | <b>1228.542</b> | <b>614.774</b>  |
| <b>1239.586</b> | <b>620.297</b>  | 11 | Y   | 9  | <b>1127.494</b> | 564.251         |
| <b>1296.608</b> | <b>648.807</b>  | 12 | G   | 8  | <b>964.431</b>  | <b>482.719</b>  |
| <b>1482.687</b> | 741.847         | 13 | W   | 7  | <b>907.409</b>  | <b>454.208</b>  |
| <b>1583.734</b> | 792.371         | 14 | T   | 6  | <b>721.330</b>  | 361.169         |
| <b>1654.772</b> | <b>827.889</b>  | 15 | A   | 5  | <b>620.282</b>  | 310.645         |
| <b>1768.815</b> | <b>884.911</b>  | 16 | N   | 4  | <b>549.245</b>  | 275.126         |
| 1899.855        | <b>950.431</b>  | 17 | M   | 3  | <b>435.202</b>  | 218.105         |
| 2028.898        | <b>1014.952</b> | 18 | E   | 2  | 304.162         | 152.584         |
| 2184.999        | <b>1093.003</b> | 19 | R   | 1  | 175.119         | 88.063          |

| b               | b(+2)           | #  | seq | #  | y               | y(+2)           |
|-----------------|-----------------|----|-----|----|-----------------|-----------------|
| 185.140         | 93.073          | 1  | R   | 19 | 2203.009        | 1102.008        |
| 272.172         | 136.589         | 2  | S   | 18 | 2018.877        | <b>1009.942</b> |
| <b>369.224</b>  | 185.116         | 3  | P   | 17 | <b>1931.845</b> | <b>966.426</b>  |
| <b>472.234</b>  | 236.620         | 4  | C   | 16 | <b>1834.792</b> | <b>917.900</b>  |
| <b>575.243</b>  | 288.125         | 5  | C   | 15 | <b>1731.783</b> | 866.395         |
| <b>688.327</b>  | 344.667         | 6  | I   | 14 | <b>1628.774</b> | <b>814.890</b>  |
| <b>787.395</b>  | 394.201         | 7  | V   | 13 | <b>1515.690</b> | <b>758.348</b>  |
| <b>888.443</b>  | <b>444.725</b>  | 8  | T   | 12 | <b>1416.621</b> | <b>708.814</b>  |
| <b>975.475</b>  | <b>488.241</b>  | 9  | S   | 11 | <b>1315.574</b> | <b>658.290</b>  |
| <b>1076.523</b> | 538.765         | 10 | T   | 10 | <b>1228.542</b> | <b>614.774</b>  |
| <b>1239.586</b> | <b>620.297</b>  | 11 | Y   | 9  | <b>1127.494</b> | <b>564.251</b>  |
| <b>1296.608</b> | <b>648.807</b>  | 12 | G   | 8  | <b>964.431</b>  | 482.719         |
| <b>1482.687</b> | <b>741.847</b>  | 13 | W   | 7  | <b>907.409</b>  | <b>454.208</b>  |
| <b>1583.734</b> | <b>792.371</b>  | 14 | T   | 6  | <b>721.330</b>  | 361.169         |
| <b>1654.772</b> | <b>827.889</b>  | 15 | A   | 5  | <b>620.282</b>  | 310.645         |
| <b>1768.815</b> | 884.911         | 16 | N   | 4  | <b>549.245</b>  | 275.126         |
| <b>1899.855</b> | <b>950.431</b>  | 17 | M   | 3  | <b>435.202</b>  | 218.105         |
| 2028.898        | <b>1014.952</b> | 18 | E   | 2  | 304.162         | 152.584         |
| 2184.999        | <b>1093.003</b> | 19 | R   | 1  | 175.119         | 88.063          |



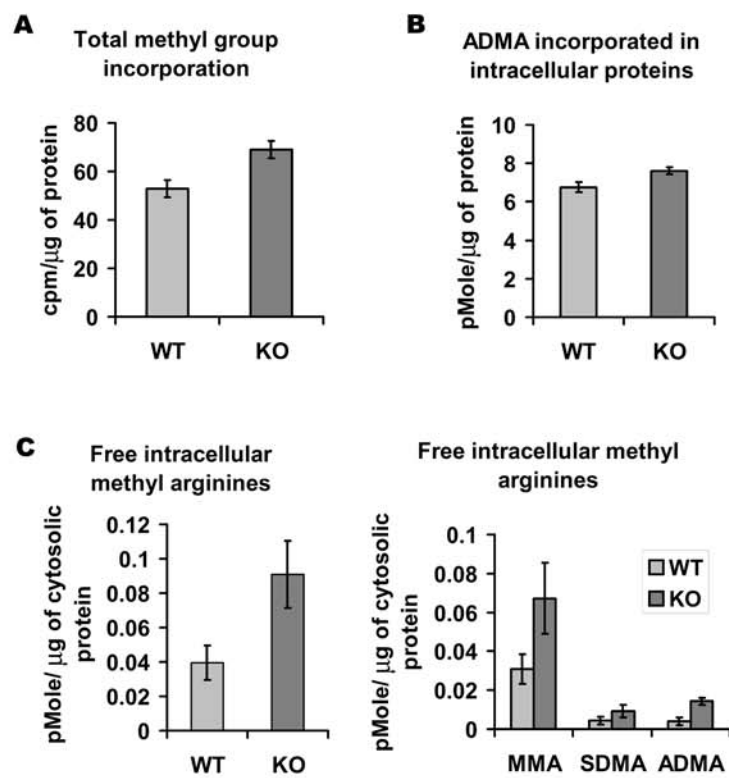

Saha\_et\_al\_Figure S3

**A**

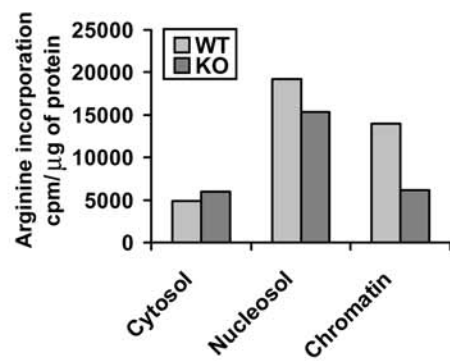

**B**

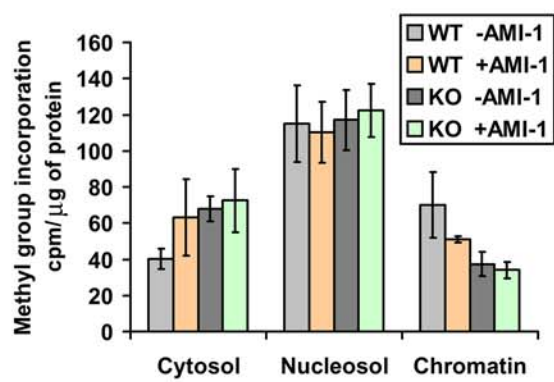

Saha\_et\_al\_Figure S4

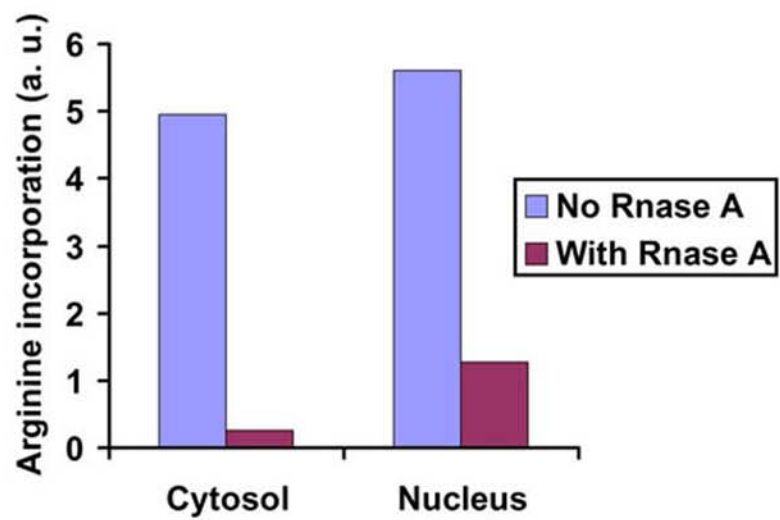

**A**

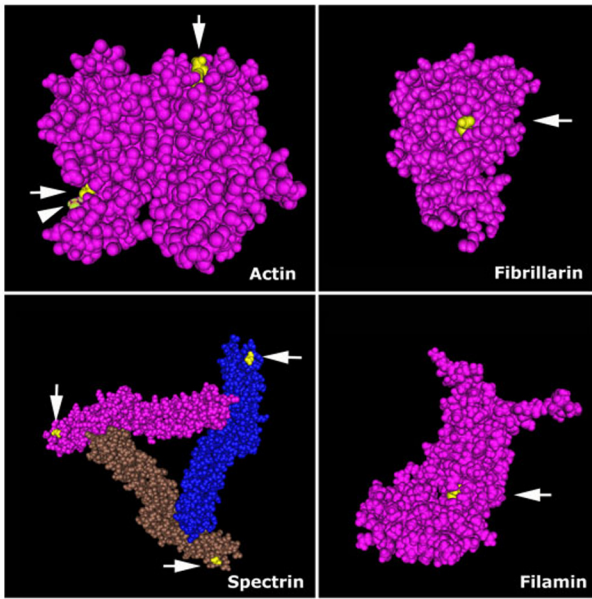

**B**

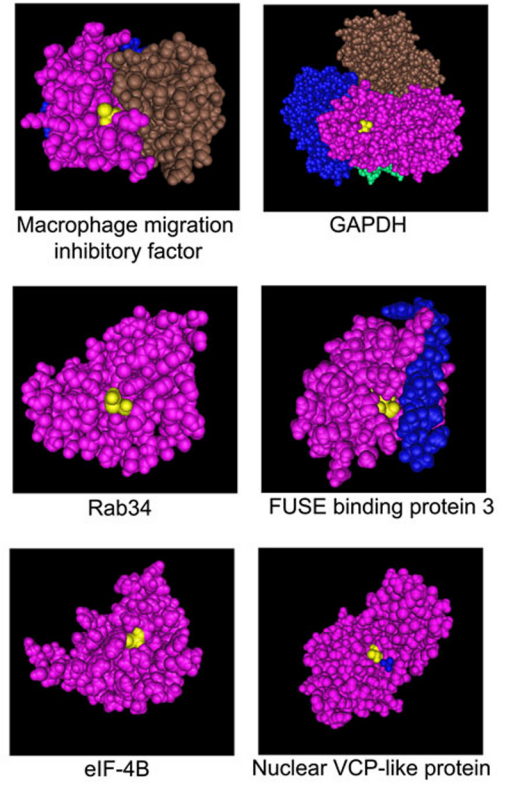

**Saha et al. “Arginylation meets methylation: posttranslational modifications double up to regulate nuclear proteins and nuclear architecture in vivo”**

**Dataset S1**

Mass spectra of arginylated/methylated peptides with detailed description of b and y ions

The following dataset contains the mass spectra of identified arginylated/methylated peptides. Each spectrum is followed by a table containing the expected and identified ions for the spectrum. The identified ions are highlighted in bold font in the tables. In the mass spectra b and y ions are marked in red and blue respectively. The complete sequence of the modified peptide is represented on top of each spectrum.

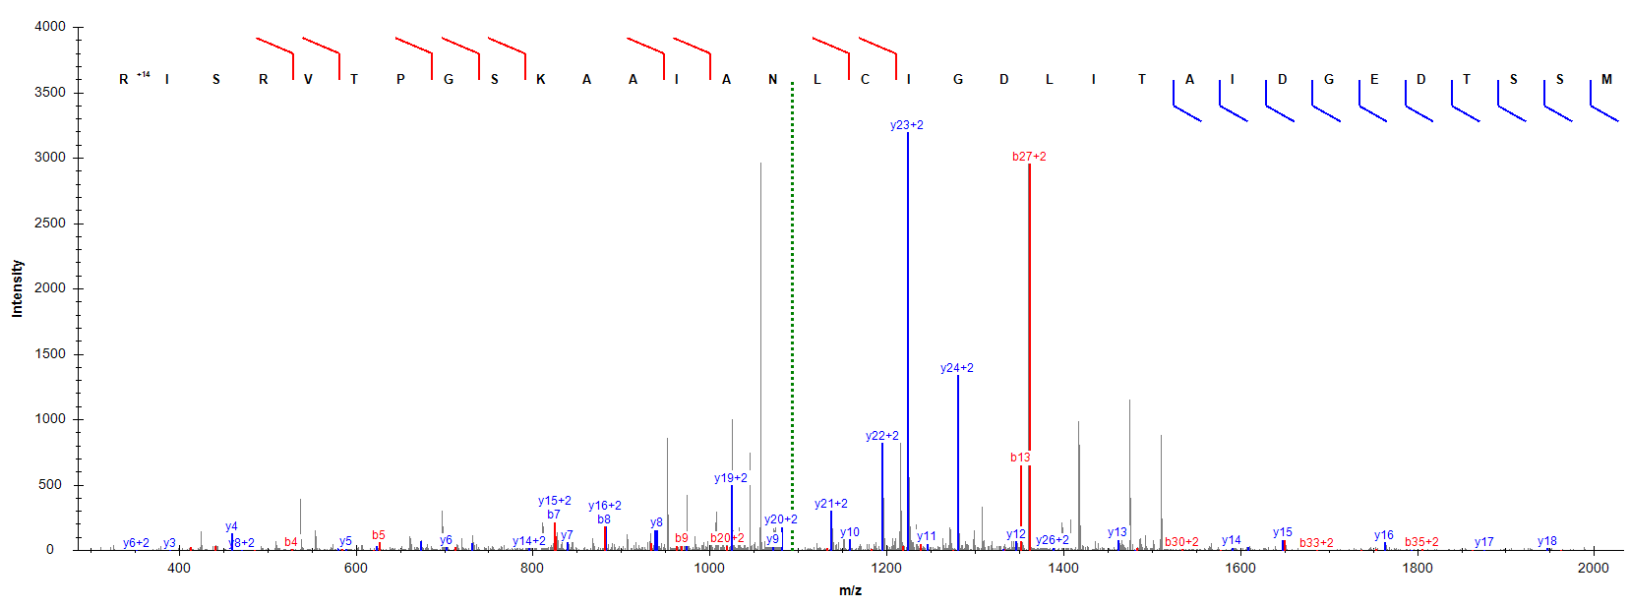

| <b>b</b>        | <b>b(+2)</b>    | <b>#</b> | <b>seq</b> | <b>#</b> | <b>y</b>        | <b>y(+2)</b>    |
|-----------------|-----------------|----------|------------|----------|-----------------|-----------------|
| 171.124         | 86.066          | 1        | R          | 41       | 4311.207        | 2156.107        |
| 284.208         | 142.608         | 2        | I          | 40       | 4141.090        | 2071.049        |
| 371.240         | 186.124         | 3        | S          | 39       | 4028.006        | 2014.507        |
| <b>527.341</b>  | 264.174         | 4        | R          | 38       | 3940.974        | 1970.991        |
| <b>626.410</b>  | 313.708         | 5        | V          | 37       | 3784.873        | 1892.940        |
| 727.457         | 364.232         | 6        | T          | 36       | 3685.805        | 1843.406        |
| <b>824.510</b>  | <b>412.759</b>  | 7        | P          | 35       | 3584.757        | <b>1792.882</b> |
| <b>881.532</b>  | <b>441.269</b>  | 8        | G          | 34       | 3487.704        | 1744.356        |
| <b>968.564</b>  | <b>484.785</b>  | 9        | S          | 33       | 3430.683        | 1715.845        |
| 1096.659        | 548.833         | 10       | K          | 32       | 3343.651        | 1672.329        |
| 1167.696        | <b>584.351</b>  | 11       | A          | 31       | 3215.556        | <b>1608.282</b> |
| <b>1238.733</b> | <b>619.870</b>  | 12       | A          | 30       | 3144.519        | 1572.763        |
| <b>1351.817</b> | 676.412         | 13       | I          | 29       | 3073.482        | 1537.244        |
| 1422.854        | <b>711.931</b>  | 14       | A          | 28       | 2960.398        | <b>1480.702</b> |
| 1536.897        | 768.952         | 15       | N          | 27       | 2889.360        | 1445.184        |
| <b>1649.981</b> | <b>825.494</b>  | 16       | L          | 26       | 2775.318        | <b>1388.162</b> |
| <b>1752.990</b> | 876.999         | 17       | C          | 25       | 2662.233        | <b>1331.620</b> |
| 1866.074        | <b>933.541</b>  | 18       | I          | 24       | 2559.224        | <b>1280.116</b> |
| 1923.096        | <b>962.051</b>  | 19       | G          | 23       | 2446.140        | <b>1223.574</b> |
| 2038.123        | <b>1019.565</b> | 20       | D          | 22       | 2389.119        | <b>1195.063</b> |
| 2151.207        | 1076.107        | 21       | L          | 21       | 2274.092        | <b>1137.550</b> |
| 2264.291        | <b>1132.649</b> | 22       | I          | 20       | 2161.008        | <b>1081.008</b> |
| 2365.338        | <b>1183.173</b> | 23       | T          | 19       | 2047.924        | <b>1024.465</b> |
| 2436.376        | <b>1218.691</b> | 24       | A          | 18       | <b>1946.876</b> | <b>973.942</b>  |

|          |                 |    |   |    |                 |                |
|----------|-----------------|----|---|----|-----------------|----------------|
| 2549.460 | <b>1275.233</b> | 25 | I | 17 | <b>1875.839</b> | <b>938.423</b> |
| 2664.487 | <b>1332.747</b> | 26 | D | 16 | <b>1762.755</b> | <b>881.881</b> |
| 2721.508 | <b>1361.258</b> | 27 | G | 15 | <b>1647.728</b> | <b>824.368</b> |
| 2850.551 | 1425.779        | 28 | E | 14 | <b>1590.706</b> | <b>795.857</b> |
| 2965.578 | <b>1483.292</b> | 29 | D | 13 | <b>1461.664</b> | <b>731.336</b> |
| 3066.625 | <b>1533.816</b> | 30 | T | 12 | <b>1346.637</b> | <b>673.822</b> |
| 3153.657 | <b>1577.332</b> | 31 | S | 11 | <b>1245.589</b> | <b>623.298</b> |
| 3240.689 | 1620.848        | 32 | S | 10 | <b>1158.557</b> | <b>579.782</b> |
| 3371.730 | <b>1686.369</b> | 33 | M | 9  | <b>1071.525</b> | 536.266        |
| 3472.777 | <b>1736.892</b> | 34 | T | 8  | <b>940.485</b>  | <b>470.746</b> |
| 3609.836 | <b>1805.422</b> | 35 | H | 7  | <b>839.437</b>  | 420.222        |
| 3722.920 | <b>1861.964</b> | 36 | L | 6  | <b>702.378</b>  | <b>351.693</b> |
| 3851.963 | 1926.485        | 37 | E | 5  | <b>589.294</b>  | 295.151        |
| 3923.000 | <b>1962.004</b> | 38 | A | 4  | <b>460.251</b>  | 230.629        |
| 4051.059 | 2026.033        | 39 | Q | 3  | <b>389.214</b>  | 195.111        |
| 4165.102 | 2083.054        | 40 | N | 2  | 261.156         | 131.082        |
| 4293.197 | 2147.102        | 41 | K | 1  | 147.113         | 74.060         |

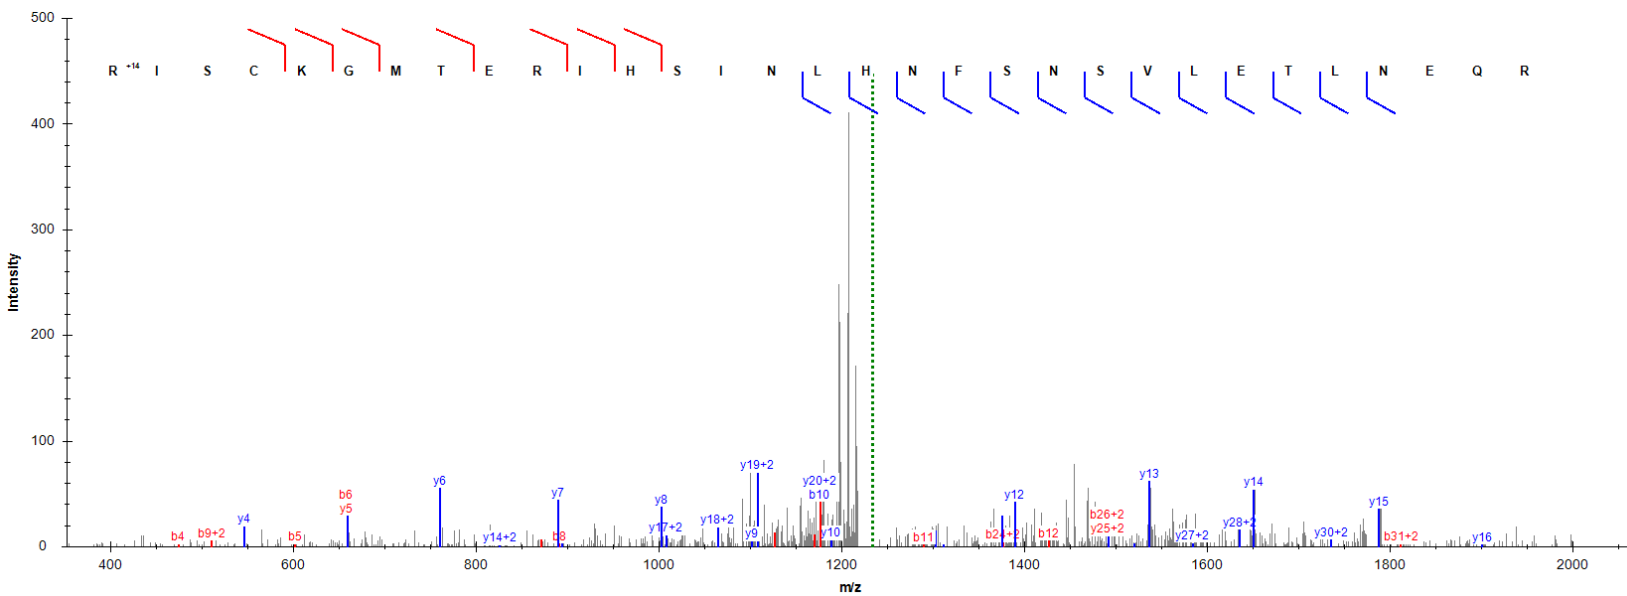

| b               | b(+2)           | #  | seq | #  | y               | y(+2)           |
|-----------------|-----------------|----|-----|----|-----------------|-----------------|
| 171.124         | 86.066          | 1  | R   | 31 | 3640.844        | 1820.925        |
| 284.208         | 142.608         | 2  | I   | 30 | 3470.727        | <b>1735.867</b> |
| 371.240         | 186.124         | 3  | S   | 29 | 3357.643        | 1679.325        |
| <b>474.249</b>  | 237.628         | 4  | C   | 28 | 3270.611        | <b>1635.809</b> |
| <b>602.344</b>  | 301.676         | 5  | K   | 27 | 3167.601        | <b>1584.304</b> |
| <b>659.366</b>  | 330.187         | 6  | G   | 26 | 3039.506        | <b>1520.257</b> |
| 790.406         | 395.707         | 7  | M   | 25 | 2982.485        | <b>1491.746</b> |
| <b>891.454</b>  | 446.231         | 8  | T   | 24 | 2851.445        | <b>1426.226</b> |
| 1020.497        | <b>510.752</b>  | 9  | E   | 23 | 2750.397        | <b>1375.702</b> |
| <b>1176.598</b> | 588.802         | 10 | R   | 22 | 2621.354        | <b>1311.181</b> |
| <b>1289.682</b> | 645.344         | 11 | I   | 21 | 2465.253        | 1233.130        |
| <b>1426.741</b> | 713.874         | 12 | H   | 20 | 2352.169        | <b>1176.588</b> |
| 1513.773        | 757.390         | 13 | S   | 19 | 2215.110        | <b>1108.059</b> |
| 1626.857        | 813.932         | 14 | I   | 18 | 2128.078        | <b>1064.543</b> |
| 1740.900        | <b>870.953</b>  | 15 | N   | 17 | 2014.994        | <b>1008.001</b> |
| 1853.984        | 927.495         | 16 | L   | 16 | <b>1900.951</b> | 950.979         |
| 1991.043        | 996.025         | 17 | H   | 15 | <b>1787.867</b> | <b>894.437</b>  |
| 2105.086        | 1053.046        | 18 | N   | 14 | <b>1650.808</b> | <b>825.908</b>  |
| 2252.154        | <b>1126.581</b> | 19 | F   | 13 | <b>1536.765</b> | 768.886         |
| 2339.186        | <b>1170.097</b> | 20 | S   | 12 | <b>1389.697</b> | 695.352         |
| 2453.229        | 1227.118        | 21 | N   | 11 | <b>1302.665</b> | 651.836         |
| 2540.261        | 1270.634        | 22 | S   | 10 | <b>1188.622</b> | 594.815         |
| 2639.329        | 1320.168        | 23 | V   | 9  | <b>1101.590</b> | 551.299         |
| 2752.413        | <b>1376.710</b> | 24 | L   | 8  | <b>1002.521</b> | 501.764         |



|          |                 |    |   |   |                |         |
|----------|-----------------|----|---|---|----------------|---------|
| 2881.456 | 1441.232        | 25 | E | 7 | <b>889.437</b> | 445.222 |
| 2982.504 | <b>1491.755</b> | 26 | T | 6 | <b>760.395</b> | 380.701 |
| 3095.588 | 1548.298        | 27 | L | 5 | <b>659.347</b> | 330.177 |
| 3209.631 | 1605.319        | 28 | N | 4 | <b>546.263</b> | 273.635 |
| 3338.673 | 1669.840        | 29 | E | 3 | 432.220        | 216.614 |
| 3466.732 | 1733.870        | 30 | Q | 2 | 303.178        | 152.092 |
| 3622.833 | <b>1811.920</b> | 31 | R | 1 | 175.119        | 88.063  |

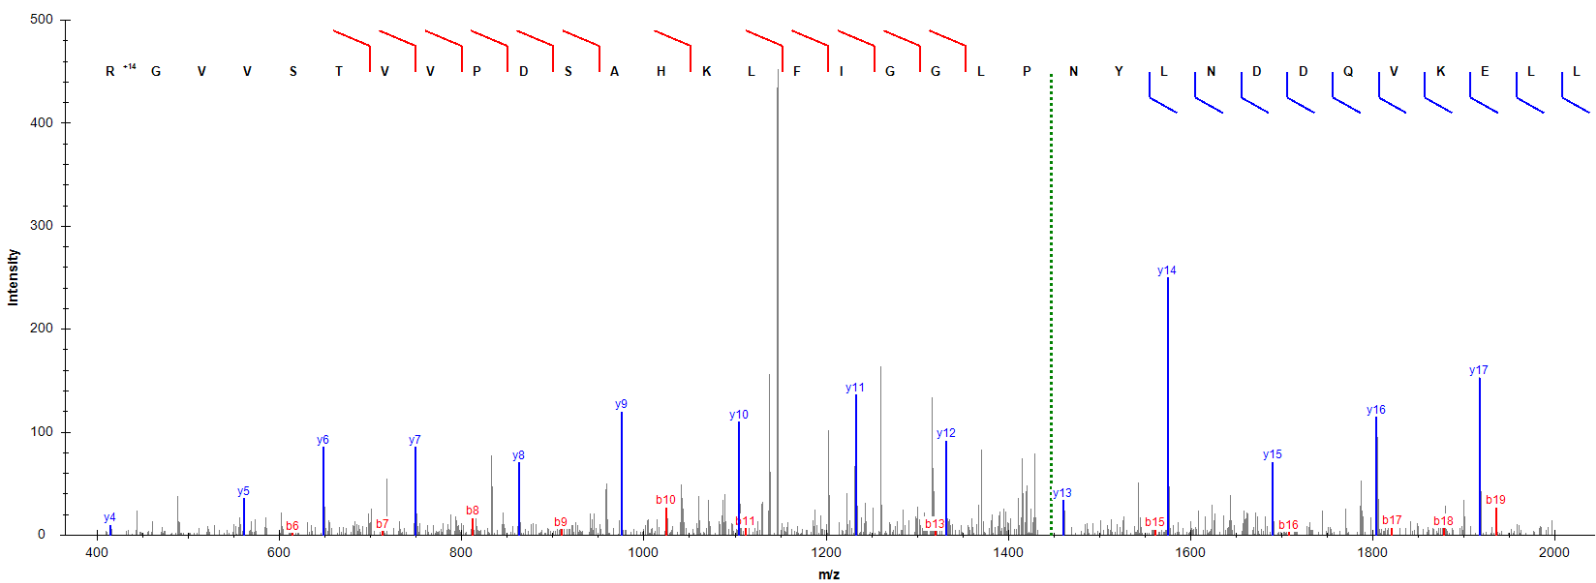

| <b>b</b>        | <b>#</b> | <b>seq</b> | <b>#</b> | <b>y</b> |
|-----------------|----------|------------|----------|----------|
| 171.124         | 1        | R          | 40       | 4338.350 |
| 228.146         | 2        | G          | 39       | 4168.233 |
| 327.214         | 3        | V          | 38       | 4111.211 |
| 426.282         | 4        | V          | 37       | 4012.143 |
| 513.314         | 5        | S          | 36       | 3913.075 |
| <b>614.362</b>  | 6        | T          | 35       | 3826.043 |
| <b>713.430</b>  | 7        | V          | 34       | 3724.995 |
| <b>812.499</b>  | 8        | V          | 33       | 3625.926 |
| <b>909.552</b>  | 9        | P          | 32       | 3526.858 |
| <b>1024.579</b> | 10       | D          | 31       | 3429.805 |
| <b>1111.611</b> | 11       | S          | 30       | 3314.778 |
| 1182.648        | 12       | A          | 29       | 3227.746 |
| <b>1319.707</b> | 13       | H          | 28       | 3156.709 |
| 1447.802        | 14       | K          | 27       | 3019.650 |
| <b>1560.886</b> | 15       | L          | 26       | 2891.555 |
| <b>1707.954</b> | 16       | F          | 25       | 2778.471 |
| <b>1821.038</b> | 17       | I          | 24       | 2631.403 |
| <b>1878.060</b> | 18       | G          | 23       | 2518.319 |
| <b>1935.081</b> | 19       | G          | 22       | 2461.297 |
| 2048.165        | 20       | L          | 21       | 2404.276 |
| 2145.218        | 21       | P          | 20       | 2291.192 |

|          |    |   |    |                 |
|----------|----|---|----|-----------------|
| 2259.261 | 22 | N | 19 | 2194.139        |
| 2422.324 | 23 | Y | 18 | 2080.096        |
| 2535.408 | 24 | L | 17 | <b>1917.033</b> |
| 2649.451 | 25 | N | 16 | <b>1803.949</b> |
| 2764.478 | 26 | D | 15 | <b>1689.906</b> |
| 2879.505 | 27 | D | 14 | <b>1574.879</b> |
| 3007.564 | 28 | Q | 13 | <b>1459.852</b> |
| 3106.632 | 29 | V | 12 | <b>1331.793</b> |
| 3234.727 | 30 | K | 11 | <b>1232.725</b> |
| 3363.770 | 31 | E | 10 | <b>1104.630</b> |
| 3476.854 | 32 | L | 9  | <b>975.587</b>  |
| 3589.938 | 33 | L | 8  | <b>862.503</b>  |
| 3690.985 | 34 | T | 7  | <b>749.419</b>  |
| 3778.017 | 35 | S | 6  | <b>648.372</b>  |
| 3925.086 | 36 | F | 5  | <b>561.340</b>  |
| 3982.107 | 37 | G | 4  | <b>414.271</b>  |
| 4079.160 | 38 | P | 3  | 357.250         |
| 4192.244 | 39 | L | 2  | 260.197         |
| 4320.339 | 40 | K | 1  | 147.113         |

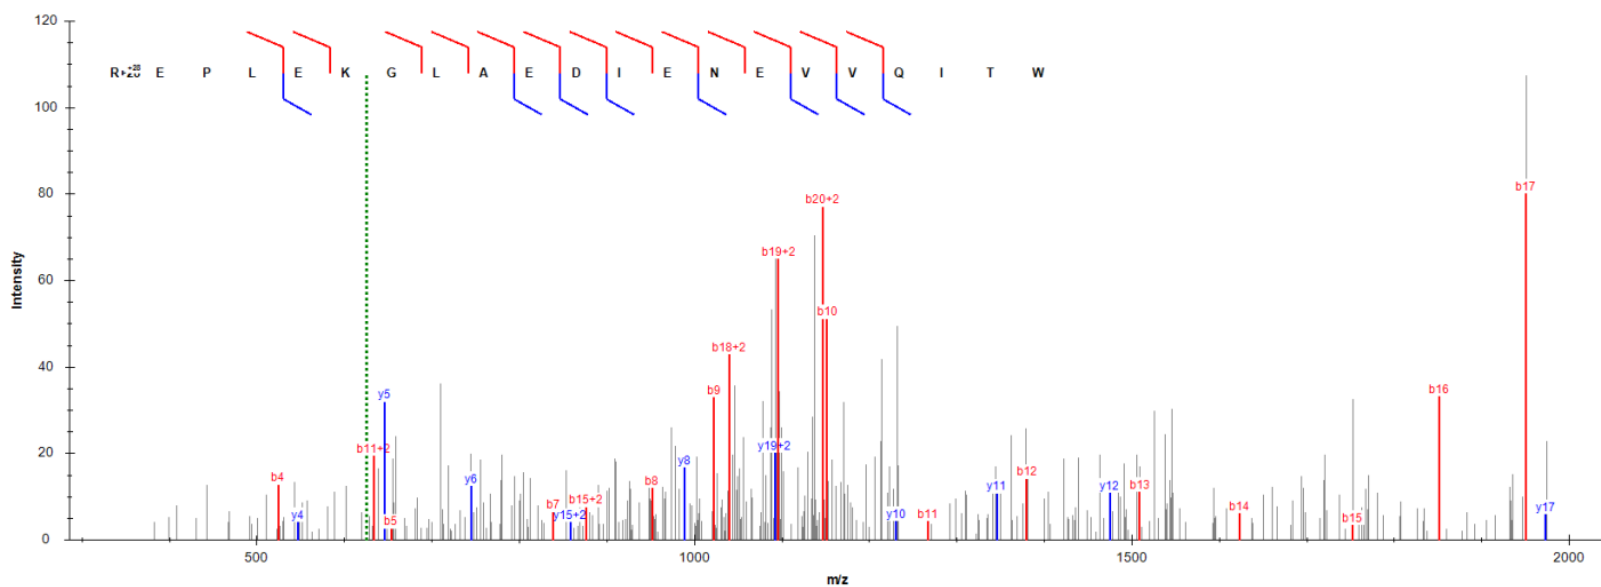

| b               | b(+2)           | #  | seq | #  | y               | y(+2)           |
|-----------------|-----------------|----|-----|----|-----------------|-----------------|
| 185.140         | 93.073          | 1  | R   | 21 | 2496.298        | 1248.653        |
| 314.182         | 157.595         | 2  | E   | 20 | 2312.166        | 1156.586        |
| 411.235         | 206.121         | 3  | P   | 19 | 2183.123        | <b>1092.065</b> |
| <b>524.319</b>  | 262.663         | 4  | L   | 18 | 2086.070        | 1043.539        |
| <b>653.362</b>  | 327.184         | 5  | E   | 17 | <b>1972.986</b> | 986.997         |
| 781.457         | 391.232         | 6  | K   | 16 | 1843.944        | 922.475         |
| <b>838.478</b>  | 419.743         | 7  | G   | 15 | 1715.849        | <b>858.428</b>  |
| <b>951.562</b>  | 476.285         | 8  | L   | 14 | 1658.827        | 829.917         |
| <b>1022.599</b> | 511.803         | 9  | A   | 13 | 1545.743        | 773.375         |
| <b>1151.642</b> | 576.325         | 10 | E   | 12 | <b>1474.706</b> | 737.857         |
| <b>1266.669</b> | <b>633.838</b>  | 11 | D   | 11 | <b>1345.663</b> | 673.335         |
| <b>1379.753</b> | 690.380         | 12 | I   | 10 | <b>1230.636</b> | 615.822         |
| <b>1508.795</b> | 754.901         | 13 | E   | 9  | 1117.552        | 559.280         |
| <b>1622.838</b> | 811.923         | 14 | N   | 8  | <b>988.510</b>  | 494.759         |
| <b>1751.881</b> | <b>876.444</b>  | 15 | E   | 7  | 874.467         | 437.737         |
| <b>1850.949</b> | 925.978         | 16 | V   | 6  | <b>745.424</b>  | 373.216         |
| <b>1950.018</b> | 975.513         | 17 | V   | 5  | <b>646.356</b>  | 323.682         |
| 2078.076        | <b>1039.542</b> | 18 | Q   | 4  | <b>547.287</b>  | 274.147         |
| 2191.160        | <b>1096.084</b> | 19 | I   | 3  | 419.229         | 210.118         |
| 2292.208        | <b>1146.608</b> | 20 | T   | 2  | 306.145         | 153.576         |
| 2478.287        | 1239.647        | 21 | W   | 1  | 205.097         | 103.052         |

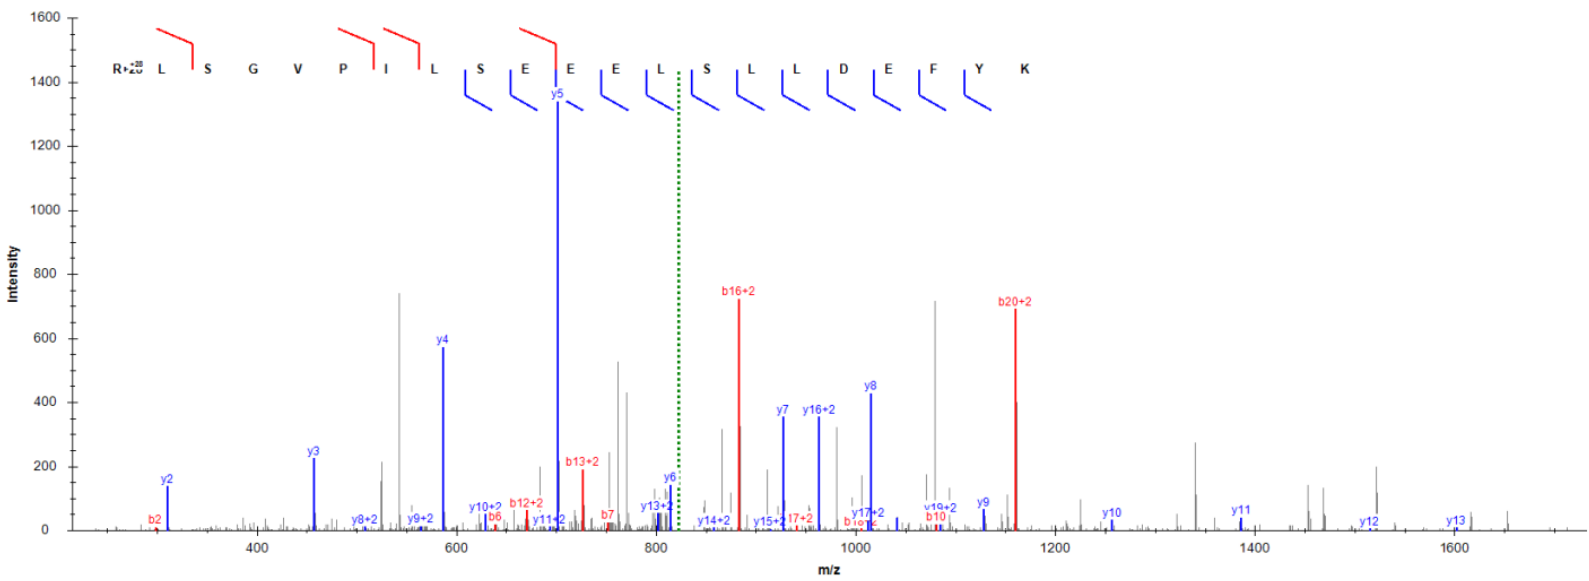

| b               | b(+2)           | #  | seq | #  | y               | y(+2)           |
|-----------------|-----------------|----|-----|----|-----------------|-----------------|
| 185.140         | 93.073          | 1  | R   | 21 | 2465.317        | 1233.162        |
| <b>298.224</b>  | 149.616         | 2  | L   | 20 | 2281.185        | 1141.096        |
| 385.256         | 193.132         | 3  | S   | 19 | 2168.101        | <b>1084.554</b> |
| 442.277         | 221.642         | 4  | G   | 18 | 2081.069        | <b>1041.038</b> |
| 541.346         | 271.176         | 5  | V   | 17 | 2024.047        | <b>1012.527</b> |
| <b>638.398</b>  | 319.703         | 6  | P   | 16 | 1924.979        | <b>962.993</b>  |
| <b>751.482</b>  | 376.245         | 7  | I   | 15 | 1827.926        | <b>914.467</b>  |
| 864.567         | 432.787         | 8  | L   | 14 | 1714.842        | <b>857.925</b>  |
| 951.599         | 476.303         | 9  | S   | 13 | <b>1601.758</b> | <b>801.383</b>  |
| <b>1080.641</b> | 540.824         | 10 | E   | 12 | <b>1514.726</b> | 757.867         |
| 1209.684        | 605.346         | 11 | E   | 11 | <b>1385.683</b> | <b>693.345</b>  |
| 1338.726        | <b>669.867</b>  | 12 | E   | 10 | <b>1256.641</b> | <b>628.824</b>  |
| 1451.810        | <b>726.409</b>  | 13 | L   | 9  | <b>1127.598</b> | <b>564.303</b>  |
| 1538.842        | 769.925         | 14 | S   | 8  | <b>1014.514</b> | <b>507.761</b>  |
| 1651.927        | 826.467         | 15 | L   | 7  | <b>927.482</b>  | 464.245         |
| 1765.011        | <b>883.009</b>  | 16 | L   | 6  | <b>814.398</b>  | 407.703         |
| 1880.038        | <b>940.522</b>  | 17 | D   | 5  | <b>701.314</b>  | 351.161         |
| 2009.080        | <b>1005.044</b> | 18 | E   | 4  | <b>586.287</b>  | 293.647         |
| 2156.149        | 1078.578        | 19 | F   | 3  | <b>457.245</b>  | 229.126         |
| 2319.212        | <b>1160.110</b> | 20 | Y   | 2  | <b>310.176</b>  | 155.592         |
| 2447.307        | 1224.157        | 21 | K   | 1  | 147.113         | 74.060          |

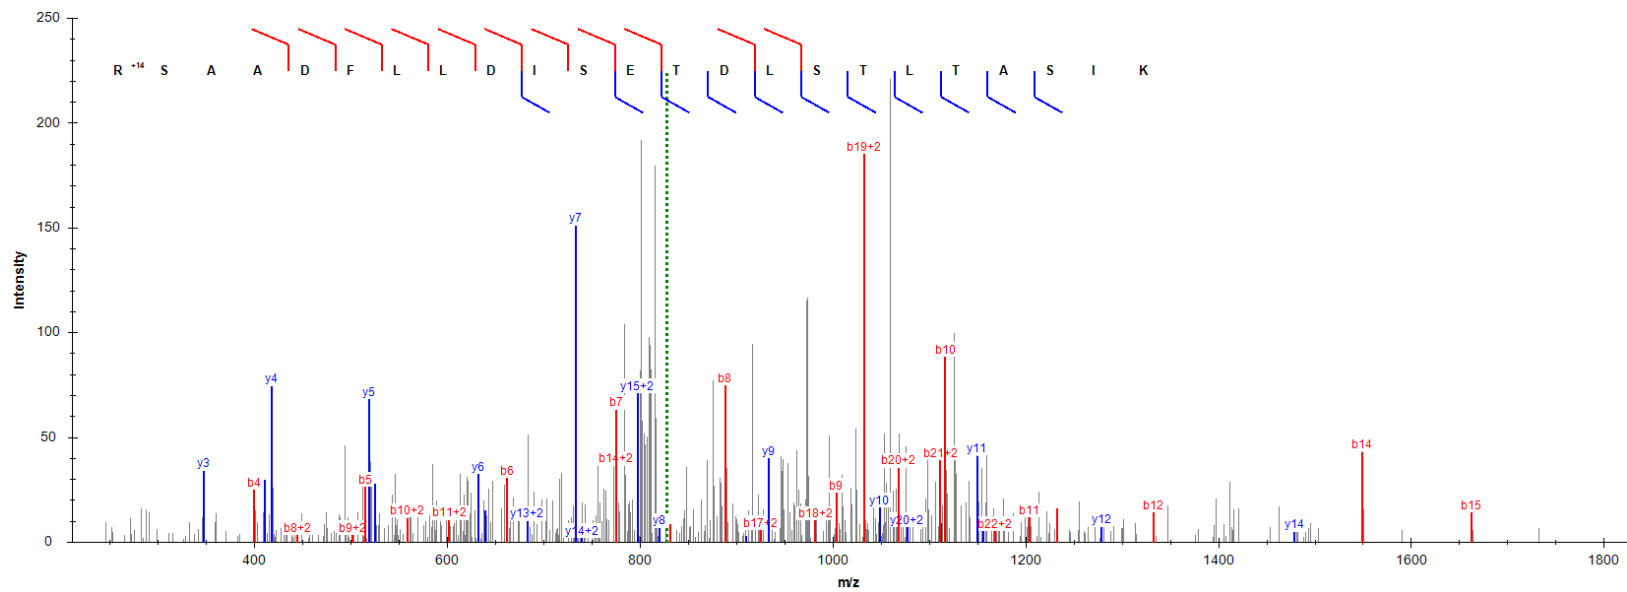

| b               | b(+2)           | #  | seq | #  | y               | y(+2)           |
|-----------------|-----------------|----|-----|----|-----------------|-----------------|
| 171.124         | 86.066          | 1  | R   | 23 | 2481.308        | 1241.158        |
| 258.156         | 129.582         | 2  | S   | 22 | 2311.192        | <b>1156.099</b> |
| 329.193         | 165.100         | 3  | A   | 21 | 2224.159        | <b>1112.583</b> |
| <b>400.230</b>  | 200.619         | 4  | A   | 20 | 2153.122        | <b>1077.065</b> |
| <b>515.257</b>  | 258.132         | 5  | D   | 19 | 2082.085        | 1041.546        |
| <b>662.326</b>  | 331.666         | 6  | F   | 18 | 1967.058        | 984.033         |
| <b>775.410</b>  | 388.209         | 7  | L   | 17 | 1819.990        | <b>910.499</b>  |
| <b>888.494</b>  | <b>444.751</b>  | 8  | L   | 16 | 1706.906        | 853.957         |
| <b>1003.521</b> | <b>502.264</b>  | 9  | D   | 15 | 1593.822        | <b>797.415</b>  |
| <b>1116.605</b> | <b>558.806</b>  | 10 | I   | 14 | <b>1478.795</b> | <b>739.901</b>  |
| <b>1203.637</b> | <b>602.322</b>  | 11 | S   | 13 | 1365.711        | <b>683.359</b>  |
| <b>1332.679</b> | 666.843         | 12 | E   | 12 | <b>1278.679</b> | <b>639.843</b>  |
| 1433.727        | 717.367         | 13 | T   | 11 | <b>1149.636</b> | 575.322         |
| <b>1548.754</b> | <b>774.881</b>  | 14 | D   | 10 | <b>1048.588</b> | <b>524.798</b>  |
| <b>1661.838</b> | <b>831.423</b>  | 15 | L   | 9  | <b>933.562</b>  | 467.284         |
| 1748.870        | 874.939         | 16 | S   | 8  | <b>820.477</b>  | <b>410.742</b>  |
| 1849.918        | <b>925.463</b>  | 17 | T   | 7  | <b>733.445</b>  | 367.226         |
| 1963.002        | <b>982.005</b>  | 18 | L   | 6  | <b>632.398</b>  | 316.703         |
| 2064.050        | <b>1032.528</b> | 19 | T   | 5  | <b>519.314</b>  | 260.160         |
| 2135.087        | <b>1068.047</b> | 20 | A   | 4  | <b>418.266</b>  | 209.637         |
| 2222.119        | <b>1111.563</b> | 21 | S   | 3  | <b>347.229</b>  | 174.118         |
| 2335.203        | <b>1168.105</b> | 22 | I   | 2  | 260.197         | 130.602         |
| 2463.298        | <b>1232.153</b> | 23 | K   | 1  | 147.113         | 74.060          |

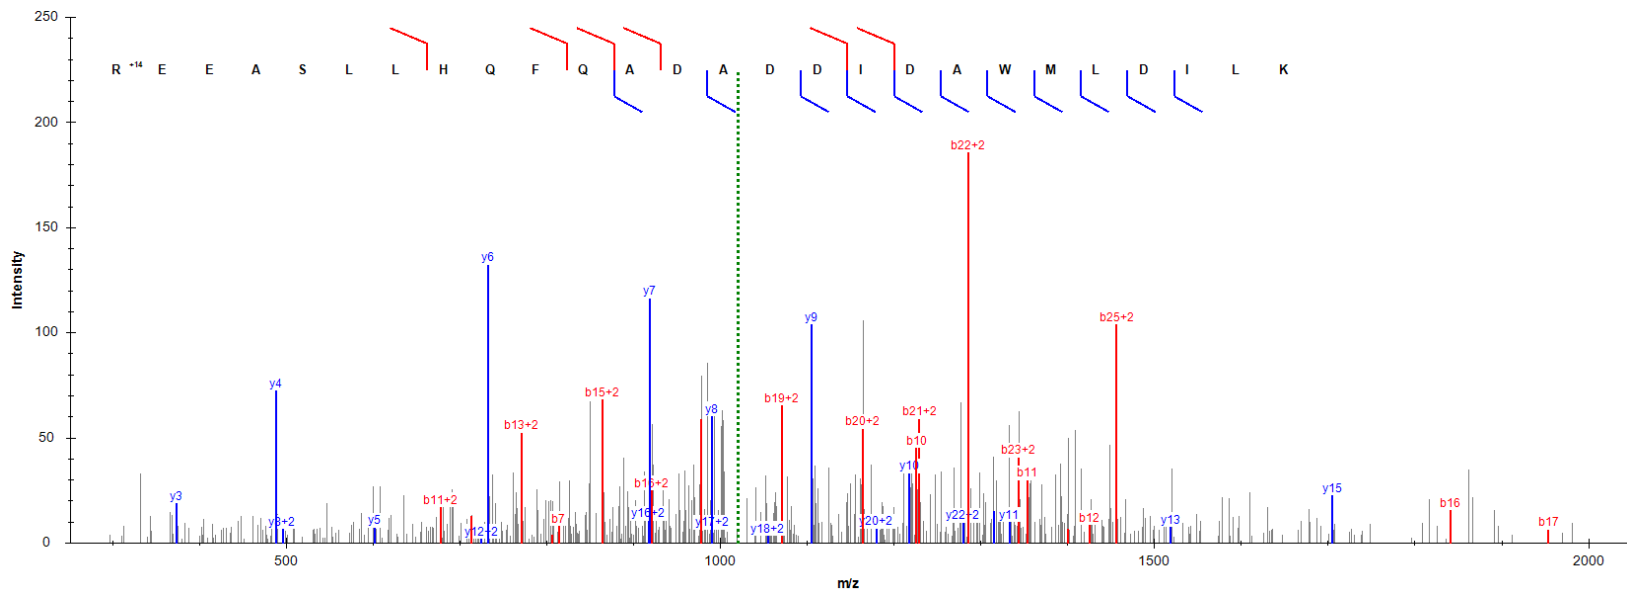

| b               | b(+2)           | #  | seq | #  | y               | y(+2)           |
|-----------------|-----------------|----|-----|----|-----------------|-----------------|
| 171.124         | 86.066          | 1  | R   | 26 | 3057.499        | 1529.253        |
| 300.167         | 150.587         | 2  | E   | 25 | 2887.382        | 1444.195        |
| 429.209         | 215.108         | 3  | E   | 24 | 2758.339        | 1379.673        |
| 500.246         | 250.627         | 4  | A   | 23 | 2629.297        | <b>1315.152</b> |
| 587.278         | 294.143         | 5  | S   | 22 | 2558.260        | <b>1279.633</b> |
| 700.362         | 350.685         | 6  | L   | 21 | 2471.228        | 1236.117        |
| <b>813.447</b>  | 407.227         | 7  | L   | 20 | 2358.143        | <b>1179.575</b> |
| 950.505         | 475.756         | 8  | H   | 19 | 2245.059        | 1123.033        |
| 1078.564        | 539.786         | 9  | Q   | 18 | 2108.000        | <b>1054.504</b> |
| <b>1225.632</b> | 613.320         | 10 | F   | 17 | 1979.942        | <b>990.475</b>  |
| <b>1353.691</b> | <b>677.349</b>  | 11 | Q   | 16 | 1832.873        | <b>916.940</b>  |
| <b>1424.728</b> | <b>712.868</b>  | 12 | A   | 15 | <b>1704.815</b> | 852.911         |
| 1539.755        | <b>770.381</b>  | 13 | D   | 14 | 1633.778        | 817.393         |
| 1610.792        | <b>805.900</b>  | 14 | A   | 13 | <b>1518.751</b> | 759.879         |
| 1725.819        | <b>863.413</b>  | 15 | D   | 12 | 1447.714        | <b>724.361</b>  |
| <b>1840.846</b> | <b>920.927</b>  | 16 | D   | 11 | <b>1332.687</b> | 666.847         |
| <b>1953.930</b> | <b>977.469</b>  | 17 | I   | 10 | <b>1217.660</b> | 609.334         |
| 2068.957        | 1034.982        | 18 | D   | 9  | <b>1104.576</b> | 552.792         |
| 2139.994        | <b>1070.501</b> | 19 | A   | 8  | <b>989.549</b>  | <b>495.278</b>  |
| 2326.074        | <b>1163.540</b> | 20 | W   | 7  | <b>918.512</b>  | 459.760         |
| 2457.114        | <b>1229.061</b> | 21 | M   | 6  | <b>732.432</b>  | 366.720         |
| 2570.198        | <b>1285.603</b> | 22 | L   | 5  | <b>601.392</b>  | 301.200         |
| 2685.225        | <b>1343.116</b> | 23 | D   | 4  | <b>488.308</b>  | 244.658         |
| 2798.309        | <b>1399.658</b> | 24 | I   | 3  | <b>373.281</b>  | 187.144         |
| 2911.393        | <b>1456.200</b> | 25 | L   | 2  | 260.197         | 130.602         |
| 3039.488        | 1520.248        | 26 | K   | 1  | 147.113         | 74.060          |

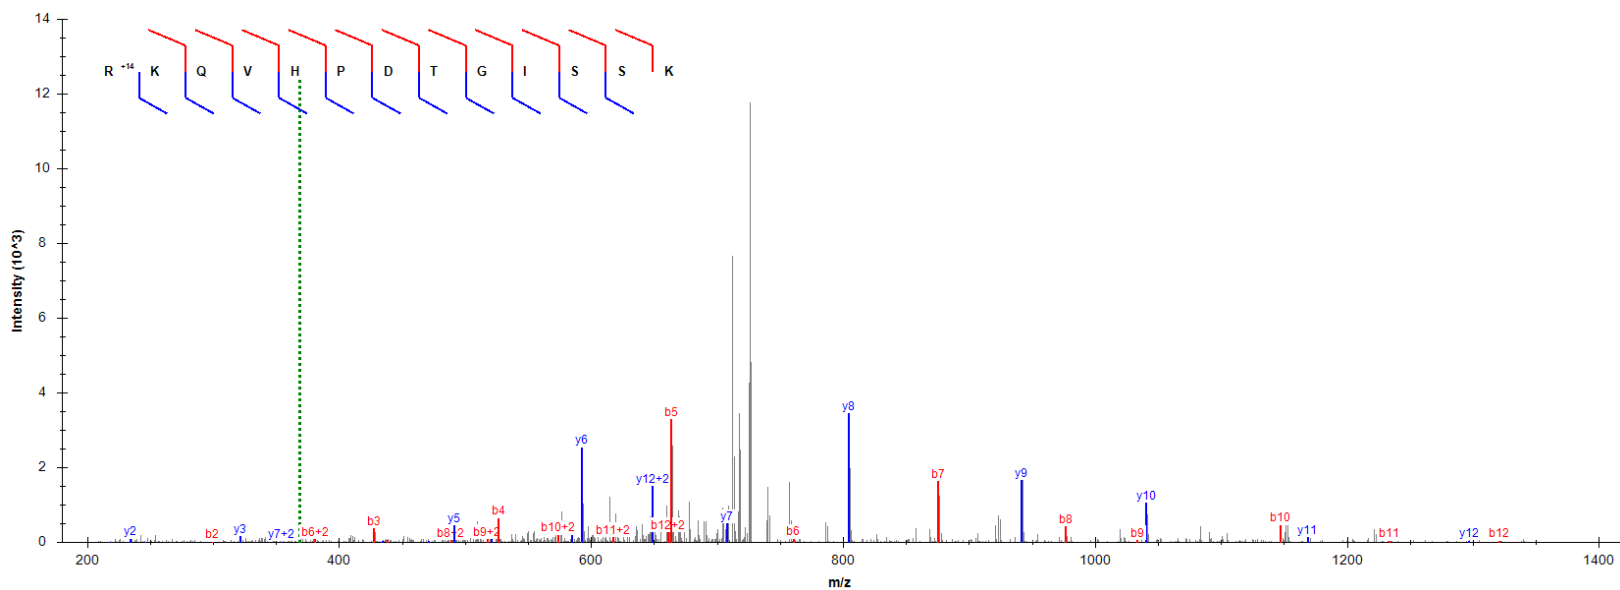

| <b>b</b>        | <b>b(+2)</b>   | <b>#</b> | <b>seq</b> | <b>#</b> | <b>y</b>        | <b>y(+2)</b>   |
|-----------------|----------------|----------|------------|----------|-----------------|----------------|
| 171.124         | 86.066         | 1        | R          | 13       | 1466.807        | 733.907        |
| <b>299.219</b>  | 150.113        | 2        | K          | 12       | <b>1296.691</b> | <b>648.849</b> |
| <b>427.278</b>  | 214.142        | 3        | Q          | 11       | <b>1168.596</b> | <b>584.801</b> |
| <b>526.346</b>  | 263.677        | 4        | V          | 10       | <b>1040.537</b> | <b>520.772</b> |
| <b>663.405</b>  | 332.206        | 5        | H          | 9        | <b>941.469</b>  | <b>471.238</b> |
| <b>760.458</b>  | <b>380.732</b> | 6        | P          | 8        | <b>804.410</b>  | 402.709        |
| <b>875.485</b>  | <b>438.246</b> | 7        | D          | 7        | <b>707.357</b>  | <b>354.182</b> |
| <b>976.532</b>  | <b>488.770</b> | 8        | T          | 6        | <b>592.330</b>  | 296.669        |
| <b>1033.554</b> | <b>517.281</b> | 9        | G          | 5        | <b>491.282</b>  | <b>246.145</b> |
| <b>1146.638</b> | <b>573.823</b> | 10       | I          | 4        | <b>434.261</b>  | <b>217.634</b> |
| <b>1233.670</b> | <b>617.339</b> | 11       | S          | 3        | <b>321.177</b>  | 161.092        |
| <b>1320.702</b> | <b>660.855</b> | 12       | S          | 2        | <b>234.145</b>  | 117.576        |
| 1448.797        | 724.902        | 13       | K          | 1        | 147.113         | 74.060         |



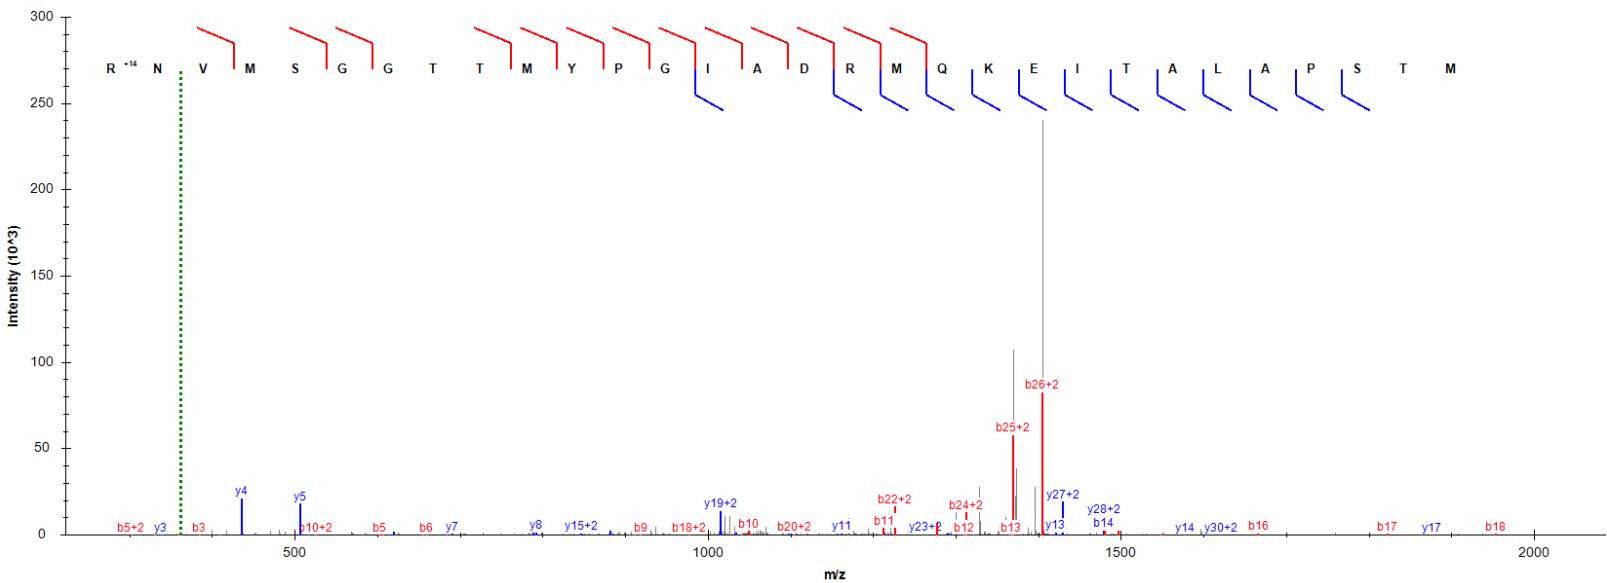

| b               | b(+2)           | #  | seq | #  | y               | y(+2)           |
|-----------------|-----------------|----|-----|----|-----------------|-----------------|
| 171.124         | 86.066          | 1  | R   | 30 | 3241.584        | <b>1621.295</b> |
| 285.167         | 143.087         | 2  | N   | 29 | 3071.467        | 1536.237        |
| <b>384.235</b>  | 192.621         | 3  | V   | 28 | 2957.424        | <b>1479.216</b> |
| 515.276         | 258.142         | 4  | M   | 27 | 2858.356        | <b>1429.681</b> |
| <b>602.308</b>  | <b>301.658</b>  | 5  | S   | 26 | 2727.315        | <b>1364.161</b> |
| <b>659.329</b>  | <b>330.168</b>  | 6  | G   | 25 | 2640.283        | <b>1320.645</b> |
| 716.351         | <b>358.679</b>  | 7  | G   | 24 | 2583.262        | <b>1292.134</b> |
| 817.399         | <b>409.203</b>  | 8  | T   | 23 | 2526.240        | <b>1263.624</b> |
| <b>918.446</b>  | 459.727         | 9  | T   | 22 | 2425.192        | <b>1213.100</b> |
| <b>1049.487</b> | <b>525.247</b>  | 10 | M   | 21 | 2324.145        | <b>1162.576</b> |
| <b>1212.550</b> | <b>606.779</b>  | 11 | Y   | 20 | 2193.104        | <b>1097.056</b> |
| <b>1309.603</b> | <b>655.305</b>  | 12 | P   | 19 | 2030.041        | <b>1015.524</b> |
| <b>1366.624</b> | <b>683.816</b>  | 13 | G   | 18 | 1932.988        | 966.998         |
| <b>1479.708</b> | 740.358         | 14 | I   | 17 | <b>1875.967</b> | 938.487         |
| <b>1550.745</b> | 775.876         | 15 | A   | 16 | 1762.883        | <b>881.945</b>  |
| <b>1665.772</b> | 833.390         | 16 | D   | 15 | 1691.846        | <b>846.426</b>  |
| <b>1821.873</b> | <b>911.440</b>  | 17 | R   | 14 | <b>1576.819</b> | <b>788.913</b>  |
| <b>1952.914</b> | <b>976.961</b>  | 18 | M   | 13 | <b>1420.717</b> | 710.862         |
| 2080.973        | <b>1040.990</b> | 19 | Q   | 12 | <b>1289.677</b> | 645.342         |
| 2209.068        | <b>1105.037</b> | 20 | K   | 11 | <b>1161.618</b> | <b>581.313</b>  |
| 2338.110        | <b>1169.559</b> | 21 | E   | 10 | <b>1033.523</b> | <b>517.265</b>  |
| 2451.194        | <b>1226.101</b> | 22 | I   | 9  | <b>904.481</b>  | 452.744         |
| 2552.242        | <b>1276.625</b> | 23 | T   | 8  | <b>791.397</b>  | <b>396.202</b>  |
| 2623.279        | <b>1312.143</b> | 24 | A   | 7  | <b>690.349</b>  | 345.678         |

|          |                 |    |   |   |                |                |
|----------|-----------------|----|---|---|----------------|----------------|
| 2736.363 | <b>1368.685</b> | 25 | L | 6 | <b>619.312</b> | <b>310.160</b> |
| 2807.400 | <b>1404.204</b> | 26 | A | 5 | <b>506.228</b> | 253.618        |
| 2904.453 | 1452.730        | 27 | P | 4 | <b>435.191</b> | 218.099        |
| 2991.485 | <b>1496.246</b> | 28 | S | 3 | <b>338.138</b> | 169.573        |
| 3092.533 | <b>1546.770</b> | 29 | T | 2 | 251.106        | 126.057        |
| 3223.573 | 1612.290        | 30 | M | 1 | 150.058        | 75.533         |



|          |                 |    |   |    |                 |                |
|----------|-----------------|----|---|----|-----------------|----------------|
| 2686.515 | 1343.761        | 26 | S | 18 | 1960.976        | <b>980.992</b> |
| 2801.542 | <b>1401.275</b> | 27 | D | 17 | <b>1873.944</b> | <b>937.476</b> |
| 2914.626 | <b>1457.817</b> | 28 | I | 16 | 1758.917        | <b>879.962</b> |
| 3013.695 | <b>1507.351</b> | 29 | V | 15 | <b>1645.833</b> | <b>823.420</b> |
| 3070.716 | <b>1535.862</b> | 30 | G | 14 | <b>1546.765</b> | <b>773.886</b> |
| 3167.769 | 1584.388        | 31 | P | 13 | <b>1489.743</b> | <b>745.375</b> |
| 3282.796 | <b>1641.902</b> | 32 | D | 12 | <b>1392.691</b> | 696.849        |
| 3339.817 | 1670.412        | 33 | G | 11 | <b>1277.664</b> | <b>639.335</b> |
| 3452.901 | <b>1726.954</b> | 34 | L | 10 | <b>1220.642</b> | <b>610.825</b> |
| 3551.970 | 1776.488        | 35 | V | 9  | <b>1107.558</b> | 554.283        |
| 3715.033 | 1858.020        | 36 | Y | 8  | <b>1008.490</b> | <b>504.749</b> |
| 3786.070 | 1893.539        | 37 | A | 7  | <b>845.426</b>  | <b>423.217</b> |
| 3885.139 | <b>1943.073</b> | 38 | V | 6  | <b>774.389</b>  | 387.698        |
| 4014.181 | 2007.594        | 39 | E | 5  | <b>675.321</b>  | <b>338.164</b> |
| 4161.250 | 2081.128        | 40 | F | 4  | <b>546.278</b>  | 273.643        |
| 4248.282 | 2124.644        | 41 | S | 3  | <b>399.210</b>  | 200.109        |
| 4385.341 | 2193.174        | 42 | H | 2  | 312.178         | 156.593        |
| 4541.442 | 2271.224        | 43 | R | 1  | 175.119         | 88.063         |

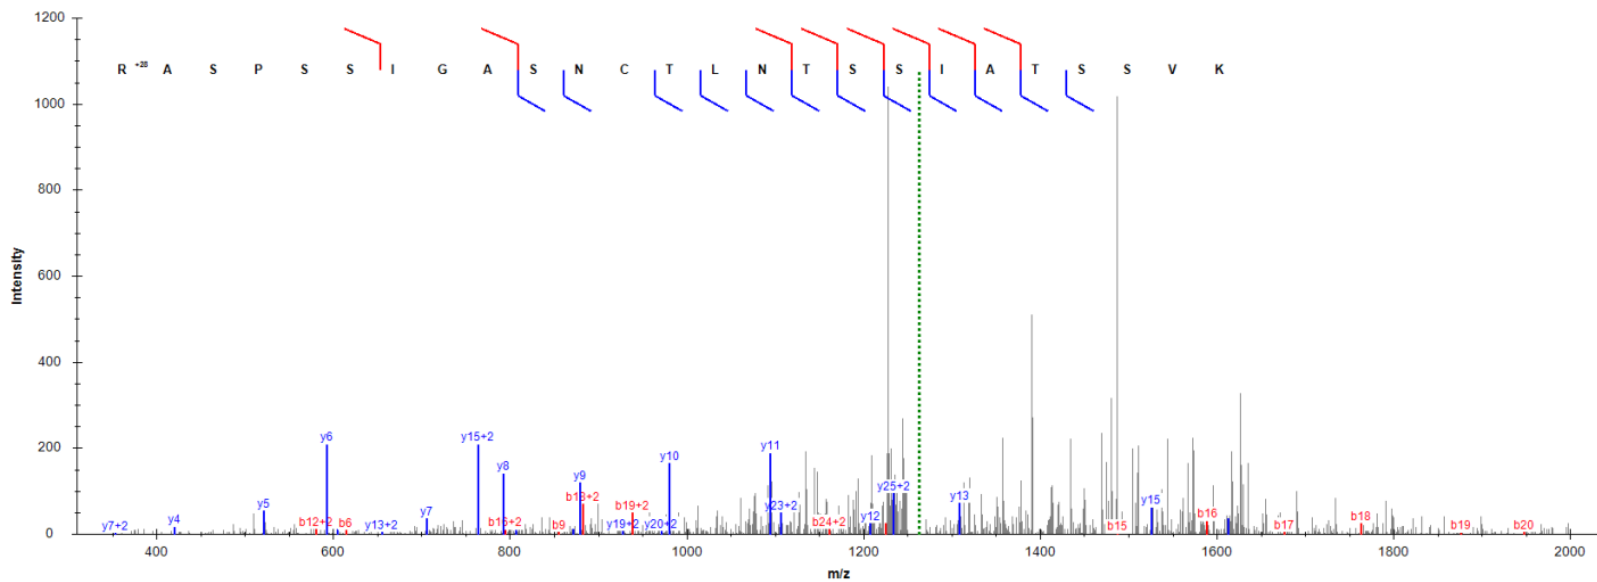

| b               | b(+2)           | #  | seq | #  | y               | y(+2)           |
|-----------------|-----------------|----|-----|----|-----------------|-----------------|
| 185.140         | 93.073          | 1  | R   | 25 | 2467.246        | <b>1234.126</b> |
| 256.177         | 128.592         | 2  | A   | 24 | 2283.113        | 1142.060        |
| 343.209         | 172.108         | 3  | S   | 23 | 2212.076        | <b>1106.542</b> |
| 440.262         | 220.634         | 4  | P   | 22 | 2125.044        | 1063.026        |
| 527.294         | 264.150         | 5  | S   | 21 | 2027.991        | 1014.499        |
| <b>614.326</b>  | 307.666         | 6  | S   | 20 | 1940.959        | <b>970.983</b>  |
| 727.410         | 364.208         | 7  | I   | 19 | 1853.927        | <b>927.467</b>  |
| 784.431         | 392.719         | 8  | G   | 18 | 1740.843        | <b>870.925</b>  |
| <b>855.468</b>  | 428.238         | 9  | A   | 17 | 1683.822        | 842.415         |
| 942.500         | 471.754         | 10 | S   | 16 | <b>1612.785</b> | <b>806.896</b>  |
| 1056.543        | 528.775         | 11 | N   | 15 | <b>1525.753</b> | <b>763.380</b>  |
| 1159.552        | <b>580.280</b>  | 12 | C   | 14 | 1411.710        | 706.358         |
| 1260.600        | 630.804         | 13 | T   | 13 | <b>1308.701</b> | <b>654.854</b>  |
| 1373.684        | 687.346         | 14 | L   | 12 | <b>1207.653</b> | <b>604.330</b>  |
| <b>1487.727</b> | 744.367         | 15 | N   | 11 | <b>1094.569</b> | 547.788         |
| <b>1588.775</b> | <b>794.891</b>  | 16 | T   | 10 | <b>980.526</b>  | 490.767         |
| <b>1675.807</b> | 838.407         | 17 | S   | 9  | <b>879.478</b>  | 440.243         |
| <b>1762.839</b> | <b>881.923</b>  | 18 | S   | 8  | <b>792.446</b>  | 396.727         |
| <b>1875.923</b> | <b>938.465</b>  | 19 | I   | 7  | <b>705.414</b>  | <b>353.211</b>  |
| <b>1946.960</b> | 973.984         | 20 | A   | 6  | <b>592.330</b>  | 296.669         |
| 2048.008        | 1024.507        | 21 | T   | 5  | <b>521.293</b>  | 261.150         |
| 2135.040        | 1068.023        | 22 | S   | 4  | <b>420.245</b>  | 210.626         |
| 2222.072        | 1111.540        | 23 | S   | 3  | 333.213         | 167.110         |
| 2321.140        | <b>1161.074</b> | 24 | V   | 2  | 246.181         | 123.594         |
| 2449.235        | <b>1225.121</b> | 25 | K   | 1  | 147.113         | 74.060          |

**Saha et al. “Arginylation and methylation double up to regulate nuclear proteins and nuclear architecture in vivo”: Supplemental Information.**

**Inventory of Supplemental Information**

Supplemental Table S1: Related to Figures 1 and S1 and Table 1

Supplemental Table S2: Related to Figures 4 and S5, Tables 1 and 2 and Datasets 1 and 2

Supplemental Table S3: Related to Tables 1 and 2 and Datasets 1 and 2

Supplemental Table S4: Related to Tables 1 and 2 and Datasets 1 and 2

Figure S1: Related to Figure 1 and Table 1.

Figure S2: Related to Figure 2.

Figure S3: Related to Figure 2.

Figure S4: Related to Figure 3.

Figure S5: Related to Figure 4 and Tables 1 and 2.

Dataset S1: Related to Figure 4 and Table 1.

Dataset S2: Related to Figure 4 and Table 2.

Supplemental Figure and Table Legends and Experimental Procedures.

## **Supplemental Table Legends:**

**Supplemental Table S1.** Accession numbers, peptide sequences, and database search parameters used for the identification of the arginylated/methylated peptides in the cytosolic samples from heart and fibroblasts and the analysis of the peptide standards shown in Fig. 1 and S1. See Experimental Procedures for method description.

**Supplemental Table S2.** Accession numbers, peptide sequences, and database search parameters used for the identification of the arginylated and arginylated/methylated peptides in nuclear subfractions shown in Tables 1 and 2 and Supplemental Datasets S1 and S2. See Experimental Procedures for method description.

**Supplemental Table S3.** Mass ambiguities considered during the validation of monomethyl-arginylated peptides, listing the identity of residues in the positions preceding the arginylation site (denoted as -1 and -2 for the two residues found N-terminally of the arginylation site in the protein sequence).

**Supplemental Table S4.** Mass ambiguities considered during the validation of dimethyl-arginylated peptides, listing the identity of residues in the positions preceding the arginylation site (denoted as -1 and -2 for the two residues found N-terminally of the arginylation site in the protein sequence).

## Supplemental Figure Legends:

**Figure S1. MS/MS spectra of the experimentally identified dimethyl-arginylated HSP90/HSP84b peptide (AAA37866) (left, natural peptide) and synthetic standard peptide containing N-terminal dimethylated Arg (right, dimethyl groups in both are denoted with double stars).** Peptide sequences and b and y ion masses are shown on the top right for each spectrum and in the tables underneath. See Supplemental Table S1 for the search parameters.

**Figure S2. Estimation of intracellular methylated Arg derivatives.** A. In vivo total methyl group incorporation in the presence of translation inhibitors, using  $^3\text{H}$ -Met as methyl donor (derived by dividing the total cpm of  $^3\text{H}$ -Met incorporation by the total protein amount in the cytosolic and nuclear fractions, from the same data as that shown in Fig 2B of the main text) presented as cpm. per  $\mu\text{g}$  of protein. Ate1 KO cells have overall higher methylation. B. Estimation of methylated Arg concentration in TCA-precipitated total intracellular protein by amino acid hydrolysis followed by HPLC. Out of the three types of methyl-Arg derivatives analysed, only asymmetric dimethyl Arg (ADMA) was detected during the analysis. Error bars +/- SEM, n = 3, p value is 0.06. Overall, levels of protein-incorporated methylated Arg are higher in Ate KO cells. C. Estimation of free intracellular methylated Arg derivatives monomethyl-Arg (MMA), symmetric dimethyl-Arg (SDMA), and asymmetric dimethyl-Arg (ADMA) in WT and Ate1 KO cell cytosol ( $100,000 \times \text{g}$  supernatant) shown as a total (left) and by individual derivatives (right). The free amino acid concentrations were normalized per  $\mu\text{g}$  of cytosolic protein present in the two cell types. Error bars +/- SEM, n = 6. Left panel, p values are 0.04. Right panel, p values are MMA: 0.09; SDMA: 0.2; ADMA: 0.003. Consistent with the results shown in A and B, methyl-Arg levels are higher in Ate1 knockout cells.



**Figure S3. Control experiments for *in vivo* incorporation of arginine and methyl groups.** A.

In vivo incorporation of  $^3\text{H}$ -Arg into different subcellular fractions of wild type (WT) and Ate1 knockout (KO) cells in the absence of protein synthesis inhibitors, presented as cpm per  $\mu\text{g}$  of protein. **B.** *In vivo* incorporation of  $^3\text{H}$ -Met into different subcellular fractions of cycloheximide/chloramphenicol-treated wild type (WT) and Ate1 knockout (KO) cells in the presence and absence of protein arginine methyl transferase inhibitor AMI-1, presented as cpm per  $\mu\text{g}$  of protein.

**Figure S4. *In vitro* Arg incorporation by endogenous ATE1 is Arg-tRNA dependent.**  $^3\text{H}$ -Arg

incorporation by endogenous ATE1 into cellular proteins in the cytosolic and nuclear extract at the 30 min time point (similarly to that shown in Fig. 3A of the main text) in the presence and absence of RNase A. RNase A abolishes the majority of arginine incorporation activity in both cytosol and nuclear extracts.

**Figure S5. Location of modified residues in tertiary structures of identified proteins.** A.

Structures of some of the arginylated/methylated proteins identified in this study. Modified residues are marked with yellow highlight and arrowheads (arginylated) or arrows (methylated/arginylated). PDB identifiers for the shown structures: actin, 1J6Z (modified sites are located on the actin subunit interface (top) and outer surface (left); neighboring residues are highlighted for visibility of the arginylation/methylation sites); fibrillarlin, 1G8A (modified site is located on the molecule surface); filamin fragment: 2K7Q; spectrin fragment: 1CUN (modified sites are located on the surfaces exposed to the molecular interactions in a folded protein). B. Structures of some of the arginylated proteins identified in this study. The

arginylated residues are marked in yellow. Macrophage migration inhibitory factor; PDB identifier: 1MFI; the image shows a trimer of the protein. GAPDH; PDB identifier: 1U8F; the image shows a tetramer of the protein. Rab 34; PDB identifier: 2FOL; the arginylation site is in the GTP and Mg binding site. FUSE binding protein 3; PDB identifier: 1X4N; the blue molecule represents an RNA molecule bound to the protein and the arginylated residue is one of the nucleotide binding residue. eIF-4B; PDB identifier: 2J76; the arginylation site is on the RNA recognition motif and RNA-binding site. Nuclear VCP-like protein; PDB identifier: 2X8A; the arginylation site is in the ATP binding pocket/ Walker A motif. The blue molecule represents a phosphate ion.

### **Supplemental Dataset Legends:**

**Dataset S1.** Related to Table 1. Mass spectra and ion mass tables of arginylated/methylated peptides. Each spectrum is followed by the corresponding ion mass table.

**Dataset S2.** Related to Table 2. Mass spectra and ion mass tables of arginylated peptides. Each spectrum is followed by the corresponding ion mass table.

## **Supplemental Experimental Procedures:**

**Nuclear fractionation and nuclear protein isolation for mass spectrometry.** Cells were lysed in the lysis buffer (0.3 M sucrose, 4 mM Mg acetate, 12.5 mM KCl, 50 mM Tris pH: 8.0, 0.5 mM arginine, 1 mM DTT, 0.2 mM PMSF, protease inhibitor cocktail). Nucleus and cytosol were separated by spinning for 5 min at 2000 x g, 4°C. The nuclei-containing pellet was resuspended in buffer B (50 mM Tris pH:7.5, 25 mM KCl, 5 mM MgCl<sub>2</sub> 0.5% NP 40, 1 mM DTT, 0.2 mM PMSF, protease inhibitor cocktail) and further purified by two extractions with buffer B followed by spinning for 5 min at 2000 x g, 4°C through 0.88 M sucrose in buffer B. Pure nuclei were lysed by resuspending in the hypertonic nuclear lysis buffer (50 mM Tris pH: 8.0, 100 mM KCl, 400 mM NaCl, 0.5 mM arginine, 4% Triton X 100, 1 mM DTT, 0.2 mM PMSF, protease inhibitor cocktail) and incubating on ice for 30 min with occasional mixing. The lysate was fractionated by spinning for 10 min at 16,000 x g at 4°C. The supernatant was collected as ‘nucleosol’ and the chromatin pellet was further extracted with histone extraction buffer (same as nuclear lysis buffer except NaCl concentration was 2 M and the buffer had no Triton X 100). The pellet was resuspended by pipetting and incubated on ice for 30 min. The suspension was centrifuged at 100,000 x g for 30 min at 4°C and the supernatant was collected as ‘chromatin associated proteins’. The pellet was further extracted by re-suspending in buffer C (10 mM Tris pH: 7.5, 2.5 mM MgCl<sub>2</sub>, 0.5 mM CaCl<sub>2</sub>) and DNase I treatment at 25°C for 20 min. The mix was centrifuged at 100,000 x g for 30 min at 4°C and the supernatant was collected as ‘chromatin integrated proteins’. Proteins from each fraction were precipitated by 20% TCA and the pellets were analyzed by mass spectrometry.

**Estimation of intracellular methyl-Arg concentrations in the protein and free metabolite pools.** For estimation of protein-integrated methyl arginine concentrations cell pellet was re-suspended in buffer D (10 mM Tris pH: 7.5, 25 mM KCl, 1 mM DTT, 0.2 mM PMSF, protease inhibitor cocktail) and lysed by sonication. The whole cell lysate was precipitated by 10% TCA and the TCA pellet was analyzed by dissolving in 70% formic acid for hydrolysis and subsequent HPLC analysis. For estimation of free methyl arginine concentrations cells were lysed in buffer E (10 mM Tris pH: 7.5 and 25mM KCl) in the same way as mentioned above and the whole cell lysate was spun at 100,000 x g for 45 min at 4°C and the supernatant was collected as cytosol. The proteins present in cytosol are precipitated by 10% TCA and the supernatant was analyzed by HPLC without acid hydrolysis. The pure methyl arginines (MMA, SDMA, and ADMA) were used as the standards in HPLC analysis. The amounts of methyl arginines injected as standrads were: MMA: 1.05 nMole; ADMA: 0.91 nMole; SDMA: 0.91 nMole. HPLC, amino acid hydrolysis, and Arg determination was performed by the W.M. Keck Foundation Biotechnology Resource Laboratory at Yale University.

**In vitro arginylation assay to estimate endogenous ATE1 activity in cellular fractions.** Prior to the assay, L-[<sup>3</sup>H] Arginine (Perkin Elmer) was charged to the tRNA<sup>Arg</sup> using arginyl-tRNA synthetase (RRS) in a reaction mix containing 50 mM Hepes, pH 7.5, 25 mM KCl, 15 mM MgCl<sub>2</sub>, 0.1 mM DTT, 2.5 mM ATP, 12.5 μM L-[<sup>3</sup>H]-Arginine, 40 μM tRNA<sup>Arg</sup>, 0.6 μM RRS, at 37°C for 1 hr. The charged tRNA was purified by chloroform extraction, 80% ethanol wash, and re-suspension in water. This purified charged tRNA was used for the final arginylation assay. For the in vitro arginylation assay cells were lysed using buffer A (50 mM Tris pH: 8, 0.3 M Sucrose, 4 mM Mg-acetate, 12.5 mM KCl, 10 mM β-ME, 0.5% NP 40, 1 mM DTT, 0.2 mM

PMSF, protease inhibitor cocktail). Nucleus and cytosol were separated by spinning at 4°C for 5 min at 2000 x g. The supernatant was collected as cytosol and the nuclear pellet was re-suspended in buffer B (50 mM Tris pH: 7.5, 25 mM KCl, 5 mM MgCl<sub>2</sub> 0.5% NP 40, 1 mM DTT, 0.2 mM PMSF, protease inhibitor cocktail) and layered on equal volume of 0.88 M sucrose in buffer B and spun at 4°C for 5 min at 2000 x g. The pellet was collected as pure nuclei and lysed in nuclear lysis buffer C (50 mM Tris pH:8.0, 25 mM KCl, 1 mM DTT, 0.2 mM PMSF, protease inhibitor cocktail) by sonication, followed by centrifugation at 4°C for 10 min at 16000 x g. The supernatant was collected as the soluble nuclear fraction for the assay. Protein concentration in the cytosolic and nuclear fraction were estimated by the Bradford assay. To estimate the endogenous ATE1 activity in the cytosolic and nuclear fractions, specific amount of the cytosolic and nuclear proteins were diluted in the ATE1 assay buffer (final concentration, 50 mM Hepes, pH 7.5, 25 mM KCl, 15 mM MgCl<sub>2</sub>, 0.1 mM DTT, 2.5 mM ATP, 400 µg/ml cycloheximide) and incubated with 60 uM L-[<sup>3</sup>H]-Arginine-charged tRNA<sup>Arg</sup> at 37°C for different time points. For the RNase A control assays, 3µg of RNase A/10µl reaction mix was added before transferring the reaction mix to 37°C. 10 µl of the reaction at each time point was immediately quenched into 40 µl of 20% Trichloroacetic acid (TCA) containing 1 mM of unlabeled Arg, and kept at room temperature for at least 10 min, followed by heating at 95°C for 15 min (to destroy the excess of the labeled Arg-tRNA), cooling down on ice for 20 min, and spinning at 16,000 x g for 30 min at 4°C to collect the pellets containing precipitated proteins. Pellets were washed 3x with 10% cold TCA and once with cold acetone, air dried, and counted in a liquid scintillation counter.

**In vitro methyl-Arg incorporation assay.** This assay was performed as a single step reaction (synthesis of methyl arginine charged tRNA coupled to the transfer of methylarginine onto the substrate) using purified RRS and ATE1-1 enzyme system and using a natural actin N-terminal peptide (DDIAALVVDNGSGMCK) as a substrate. The reaction mix (50  $\mu$ M peptide, 50 mM Hepes pH 7.5, 25 mM KCl, 15 mM MgCl<sub>2</sub>, 0.1 mM DTT, 2.5 mM ATP, 4 mM methylarginine, 50  $\mu$ M tRNA<sup>Arg</sup>, 0.6  $\mu$ M RRS, and 3.4  $\mu$ M Ate1-1) was prepared with either of the three different methylarginine species MMA, SDMA and ADMA and incubated at 37°C for 1 hr. The peptides were purified using C18 columns and analyzed by MALDI-TOF mass spectrometry.
